# Supplementary material for: Evolutionary Invariant of the Structure of DNA Double Helix in RNAP II Core Promoters
Source: MDPI journal article supplement (doi:10.3390/ijms231810873), 2022-09-17

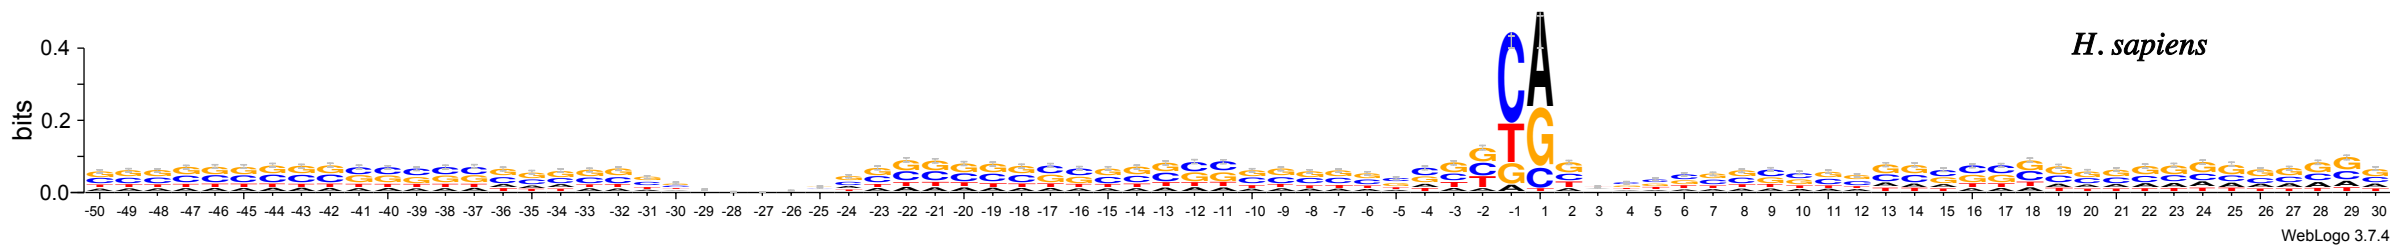

*M. mulatta*

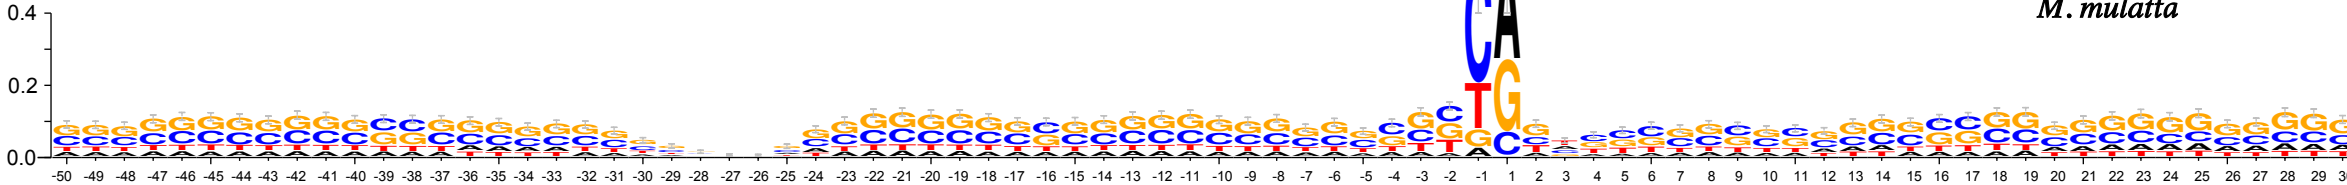

*M. musculus*

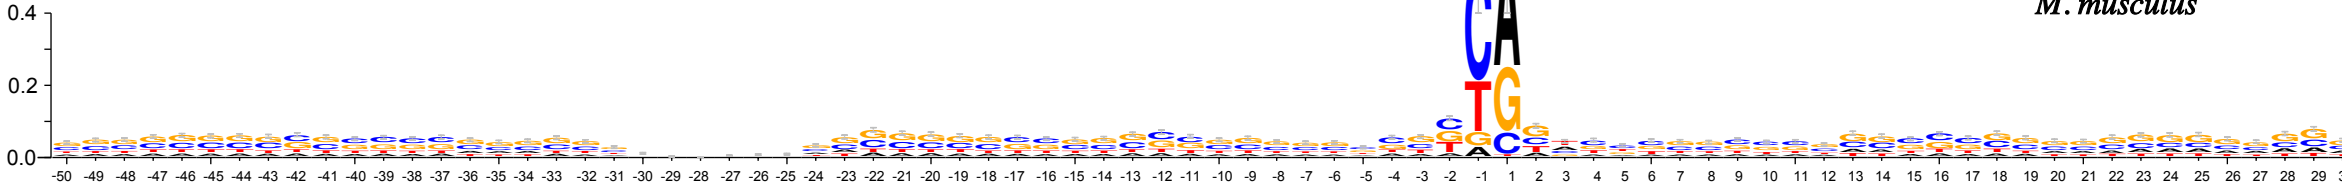

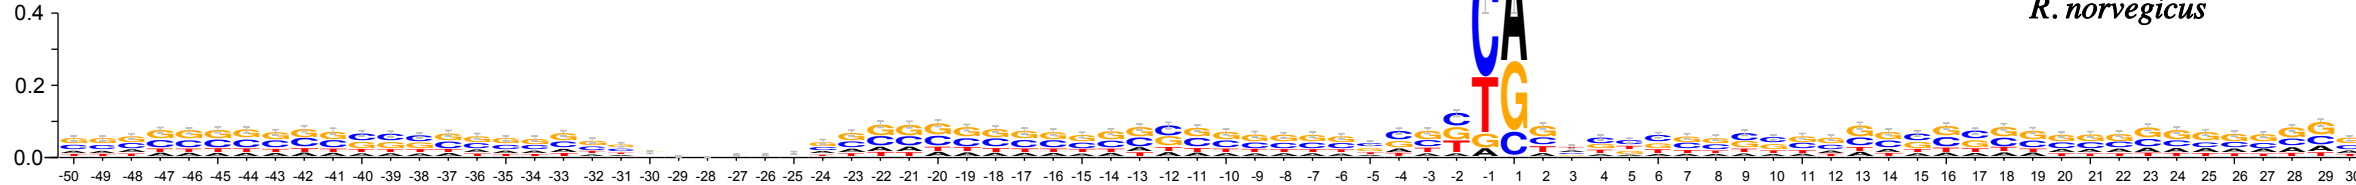

*G. gallus*

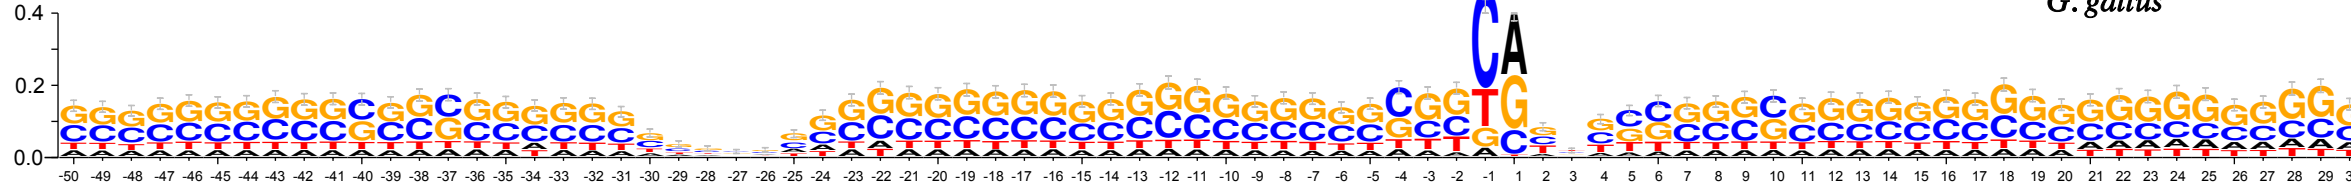

*C. familiaris*

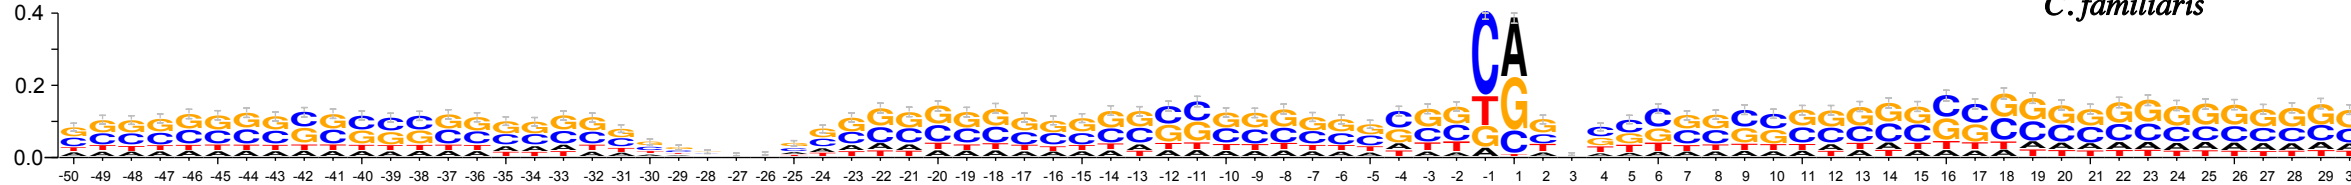

*D. melanogaster*

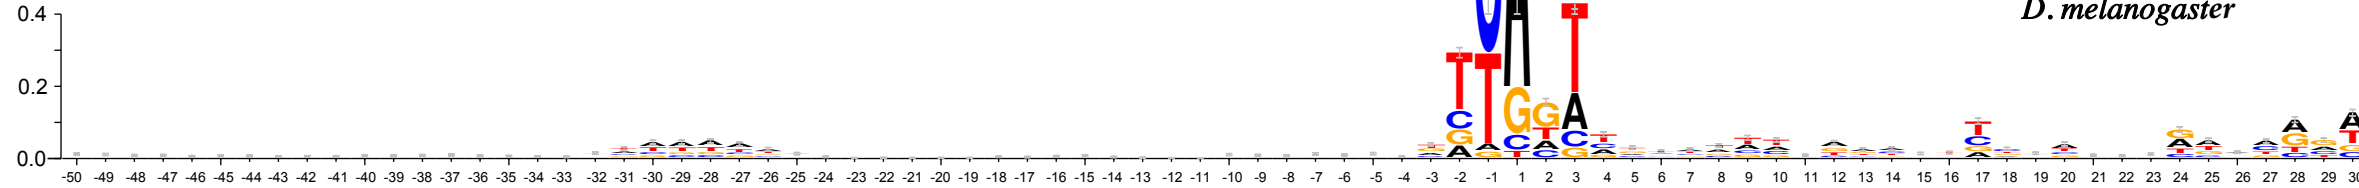

*A. mellifera*

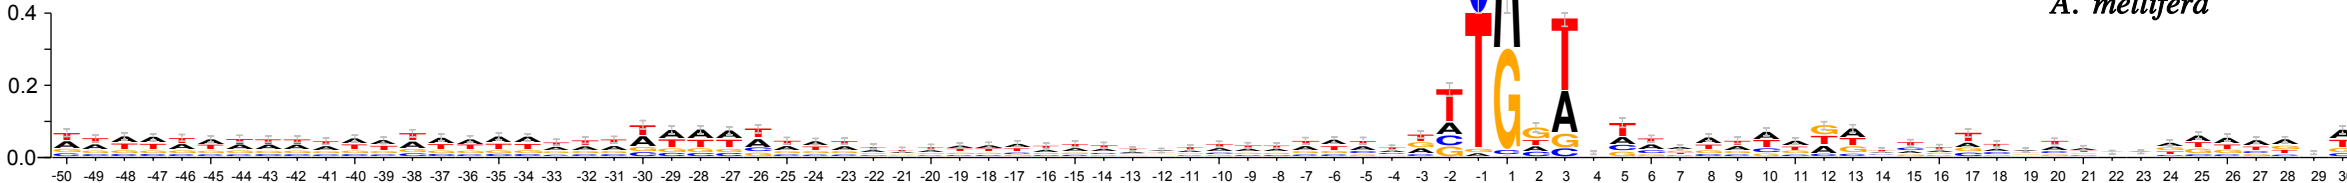

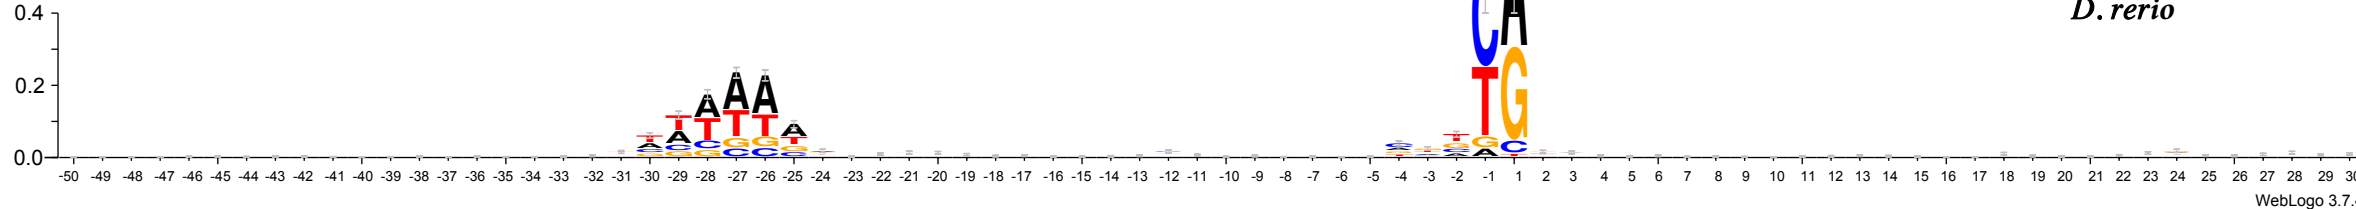

*C. elegans*

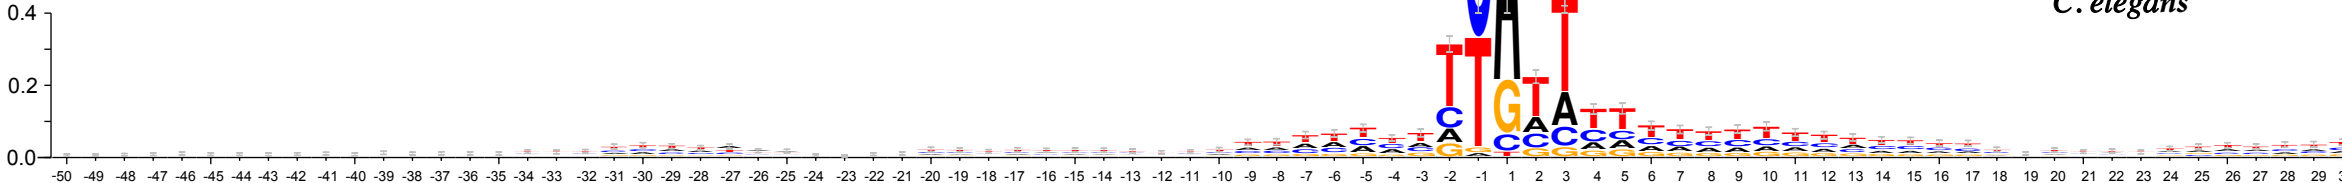

*A. thaliana*

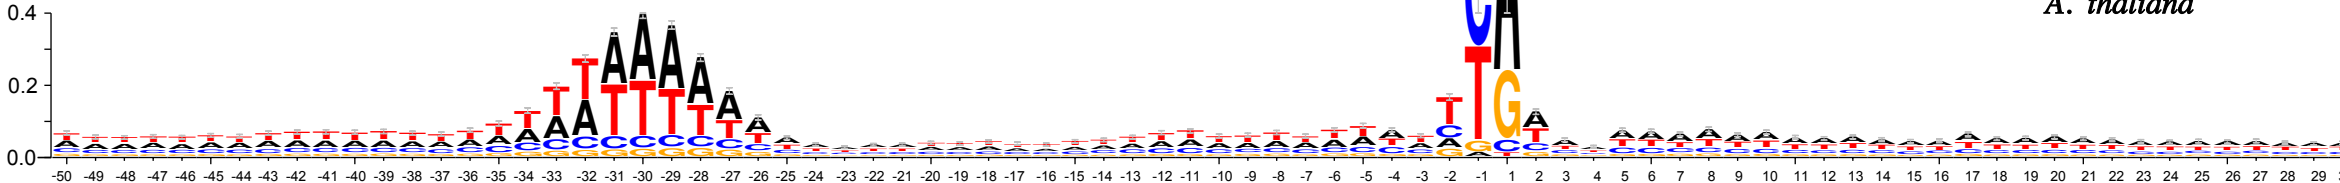

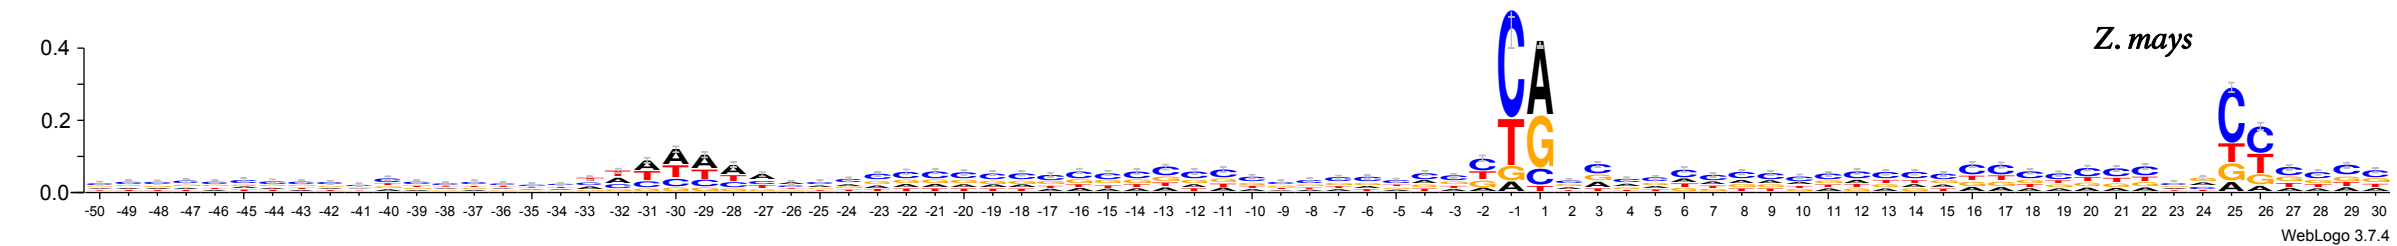

*S. cerevisiae*

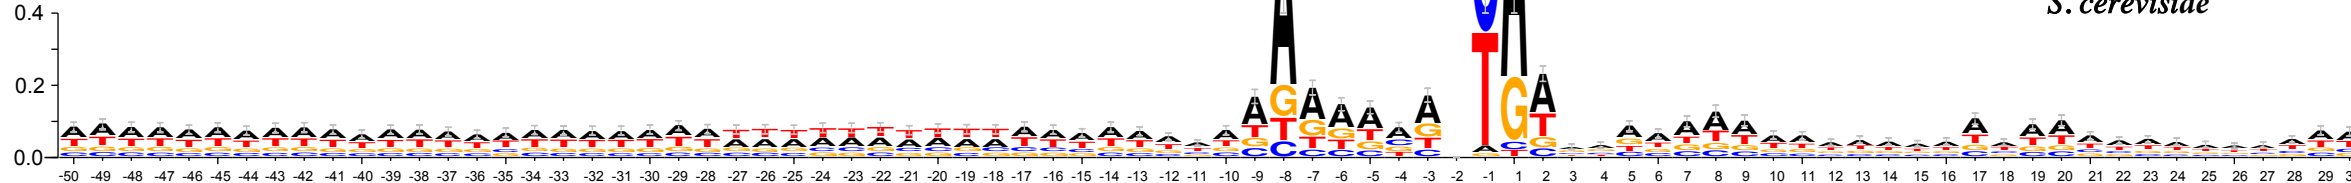

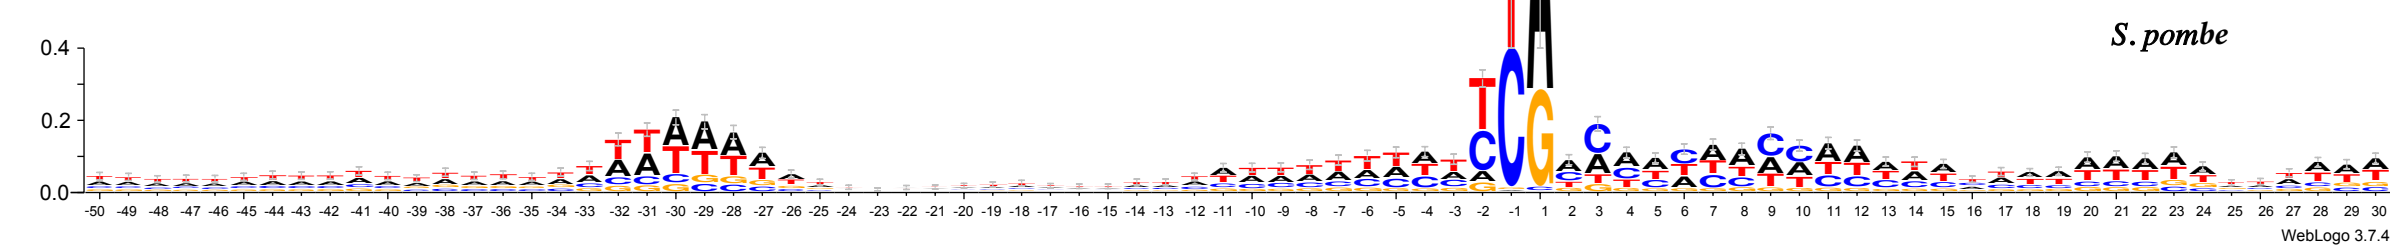

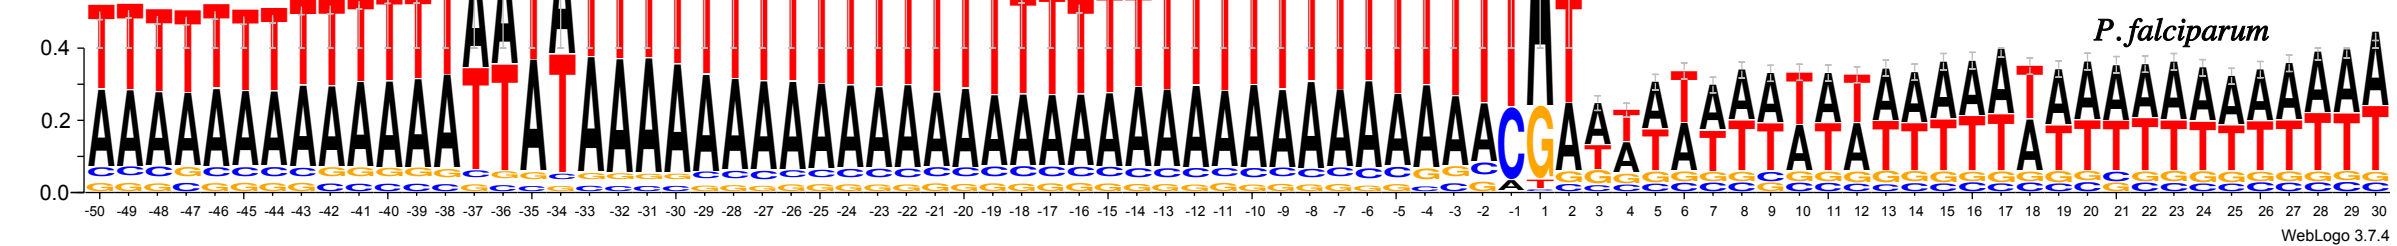

Supplement: s1 [file s1]
