# Supplementary material for: Evolutionary Invariant of the Structure of DNA Double Helix in RNAP II Core Promoters
Source: MDPI journal article supplement (doi:10.3390/ijms231810873), 2022-09-17

*H. sapiens*

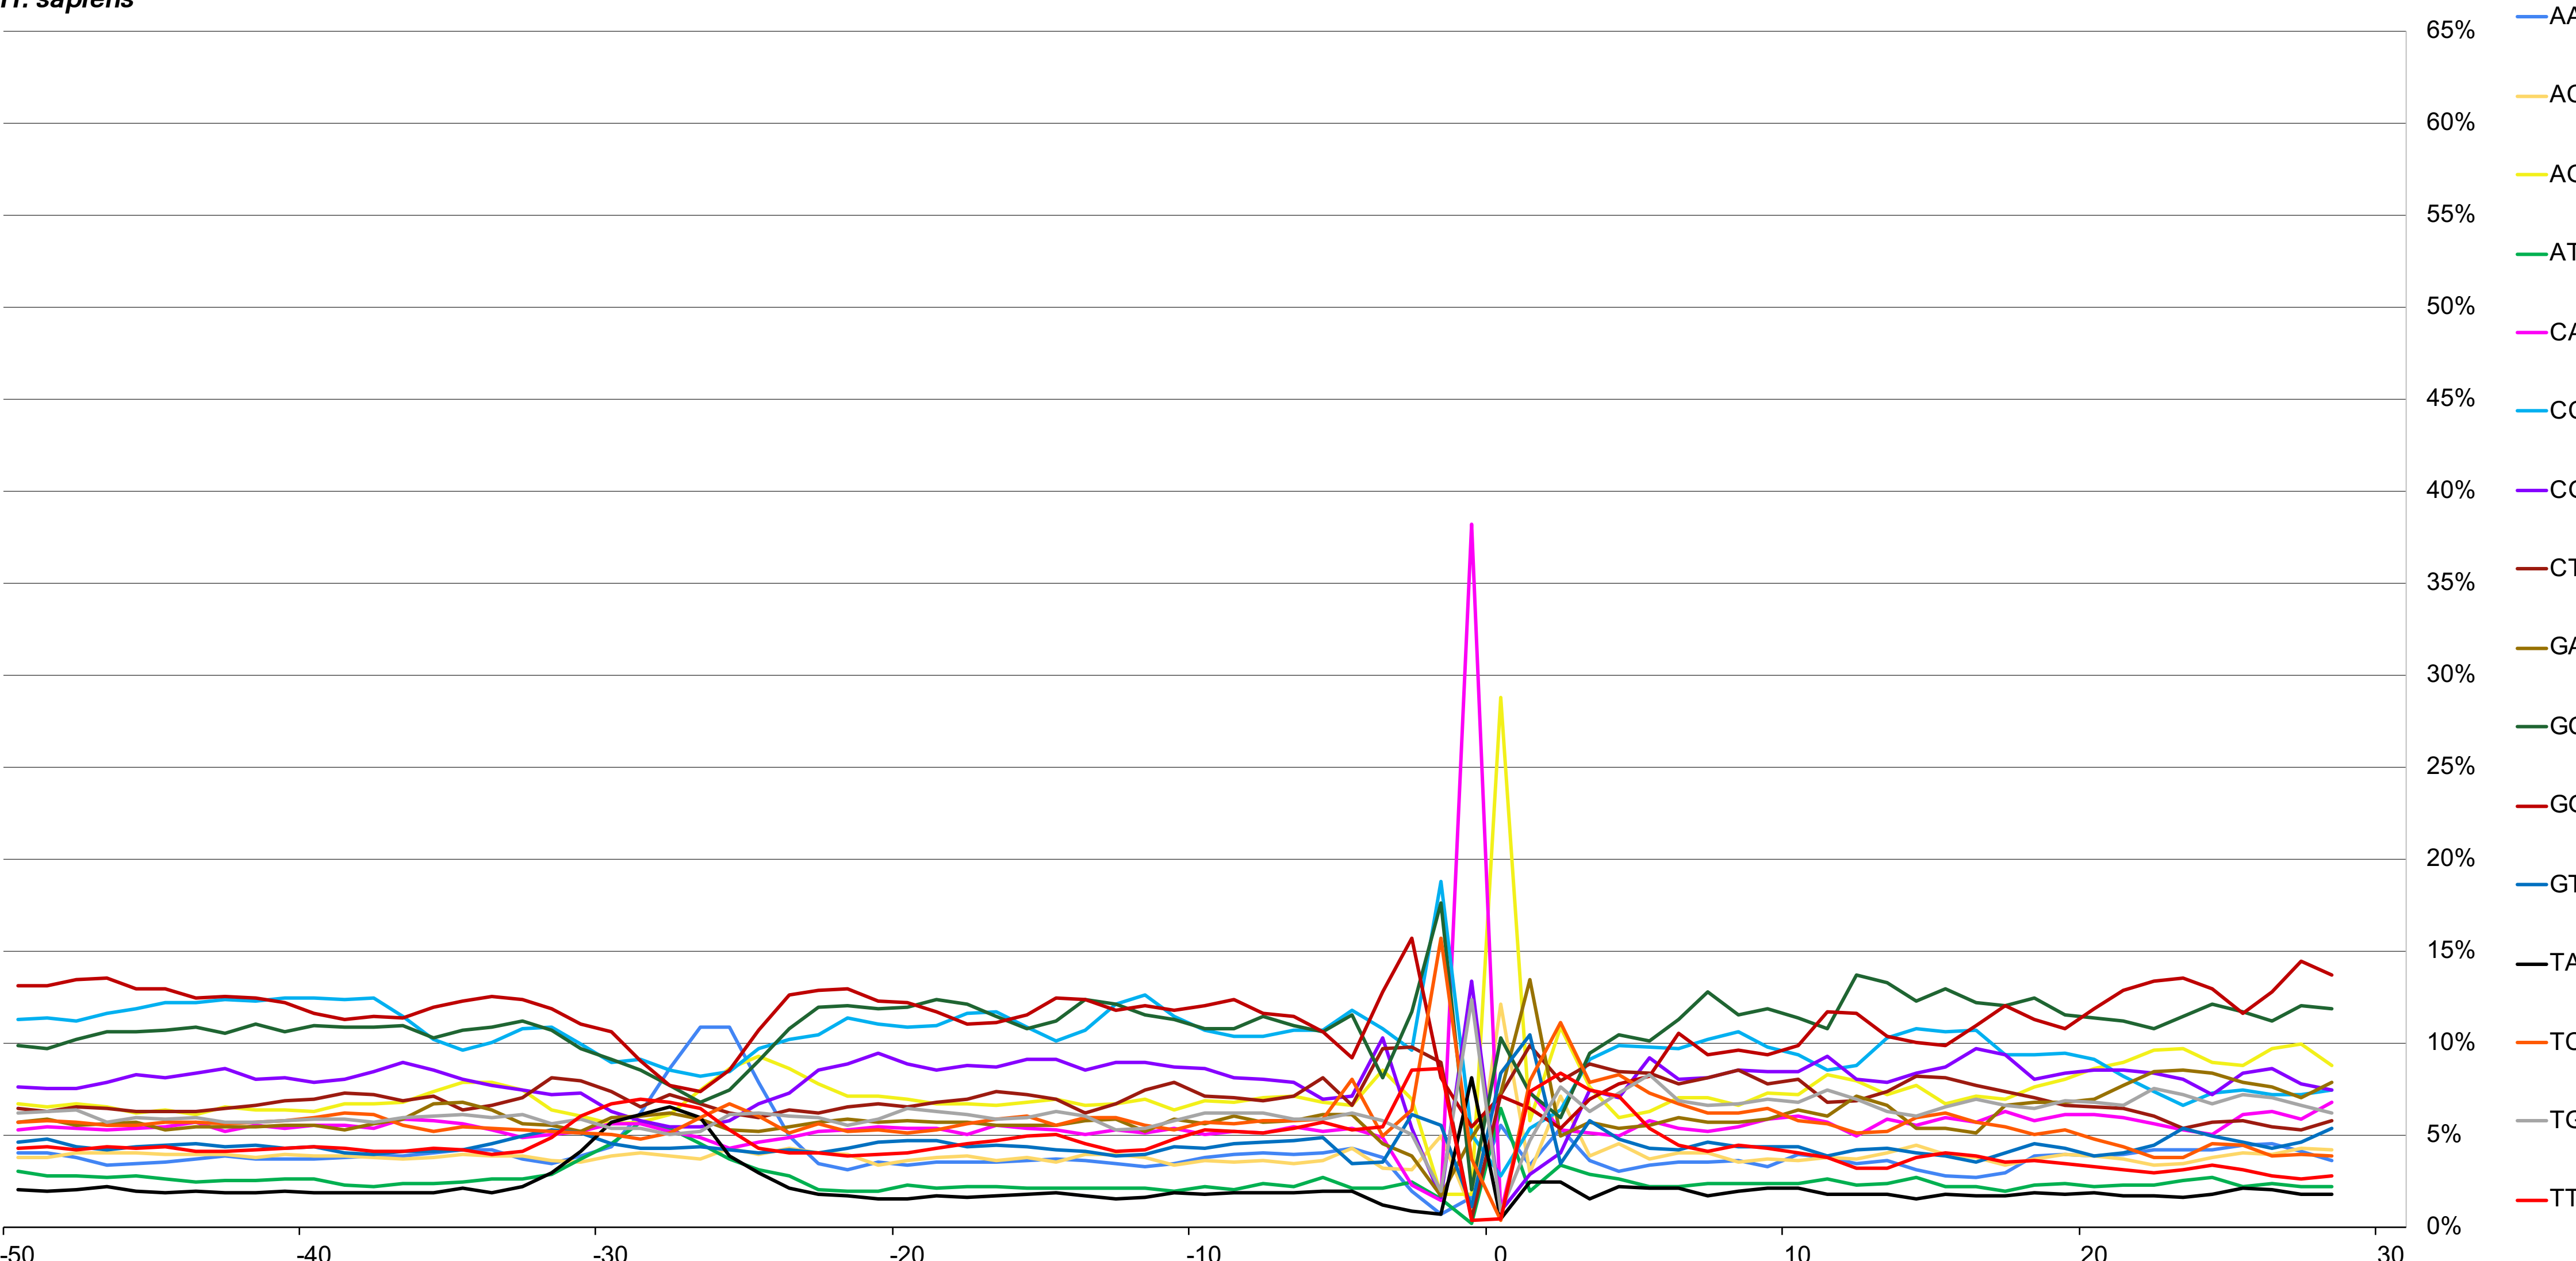

*M. mulatta*

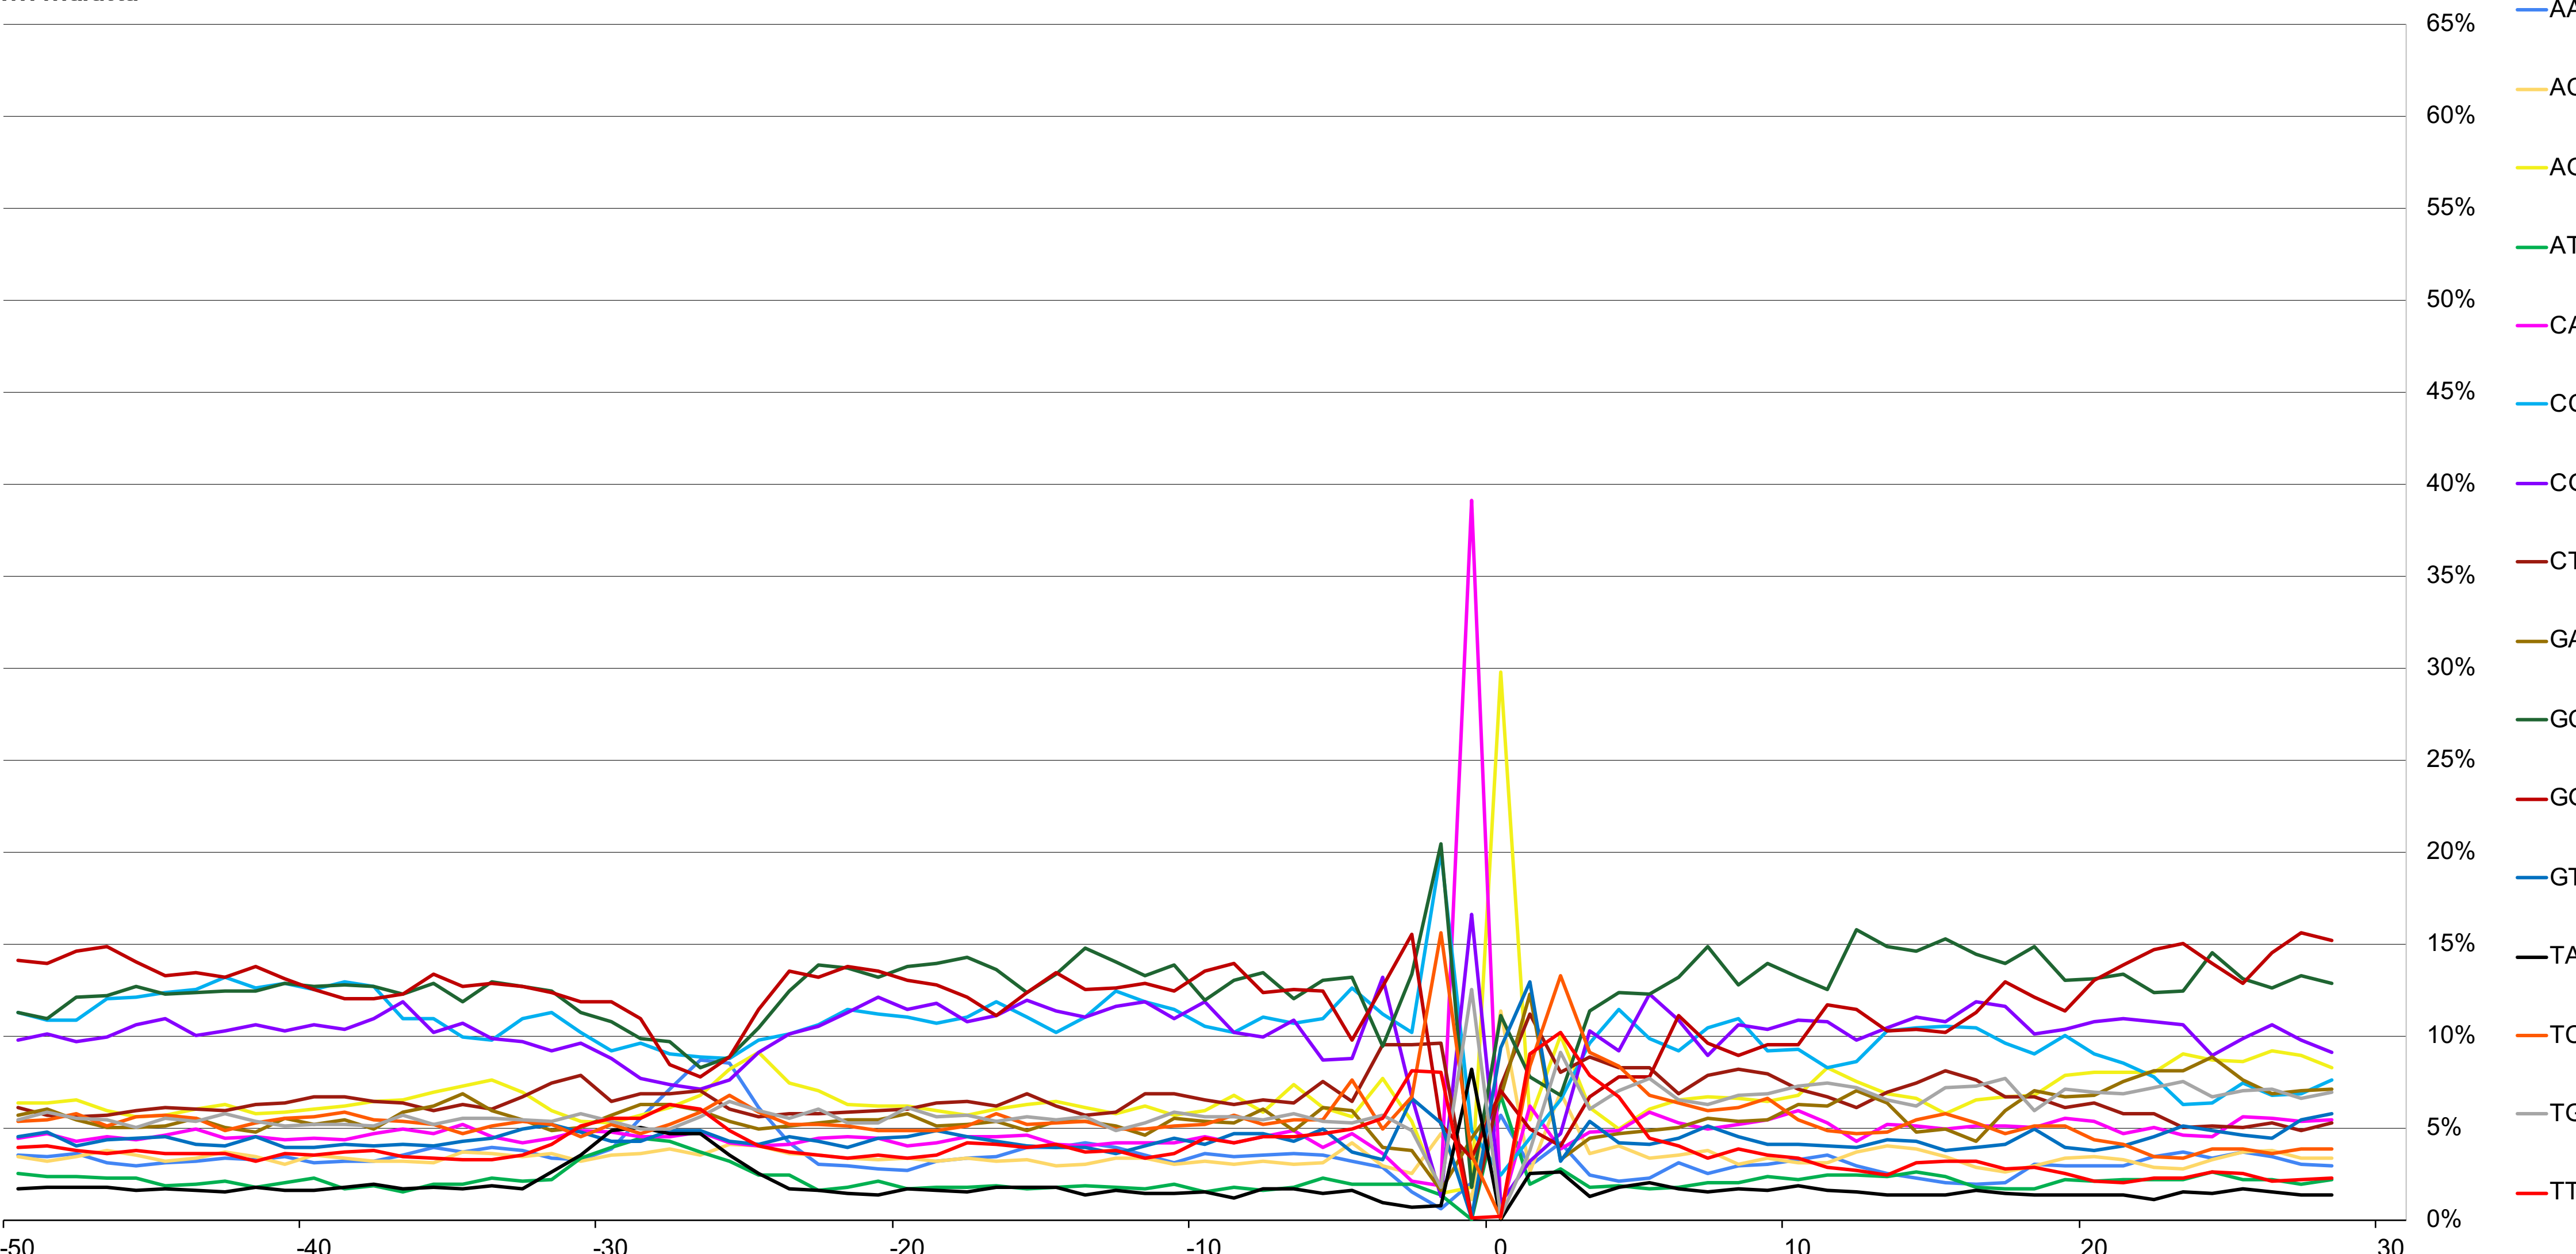

*M. musculus*

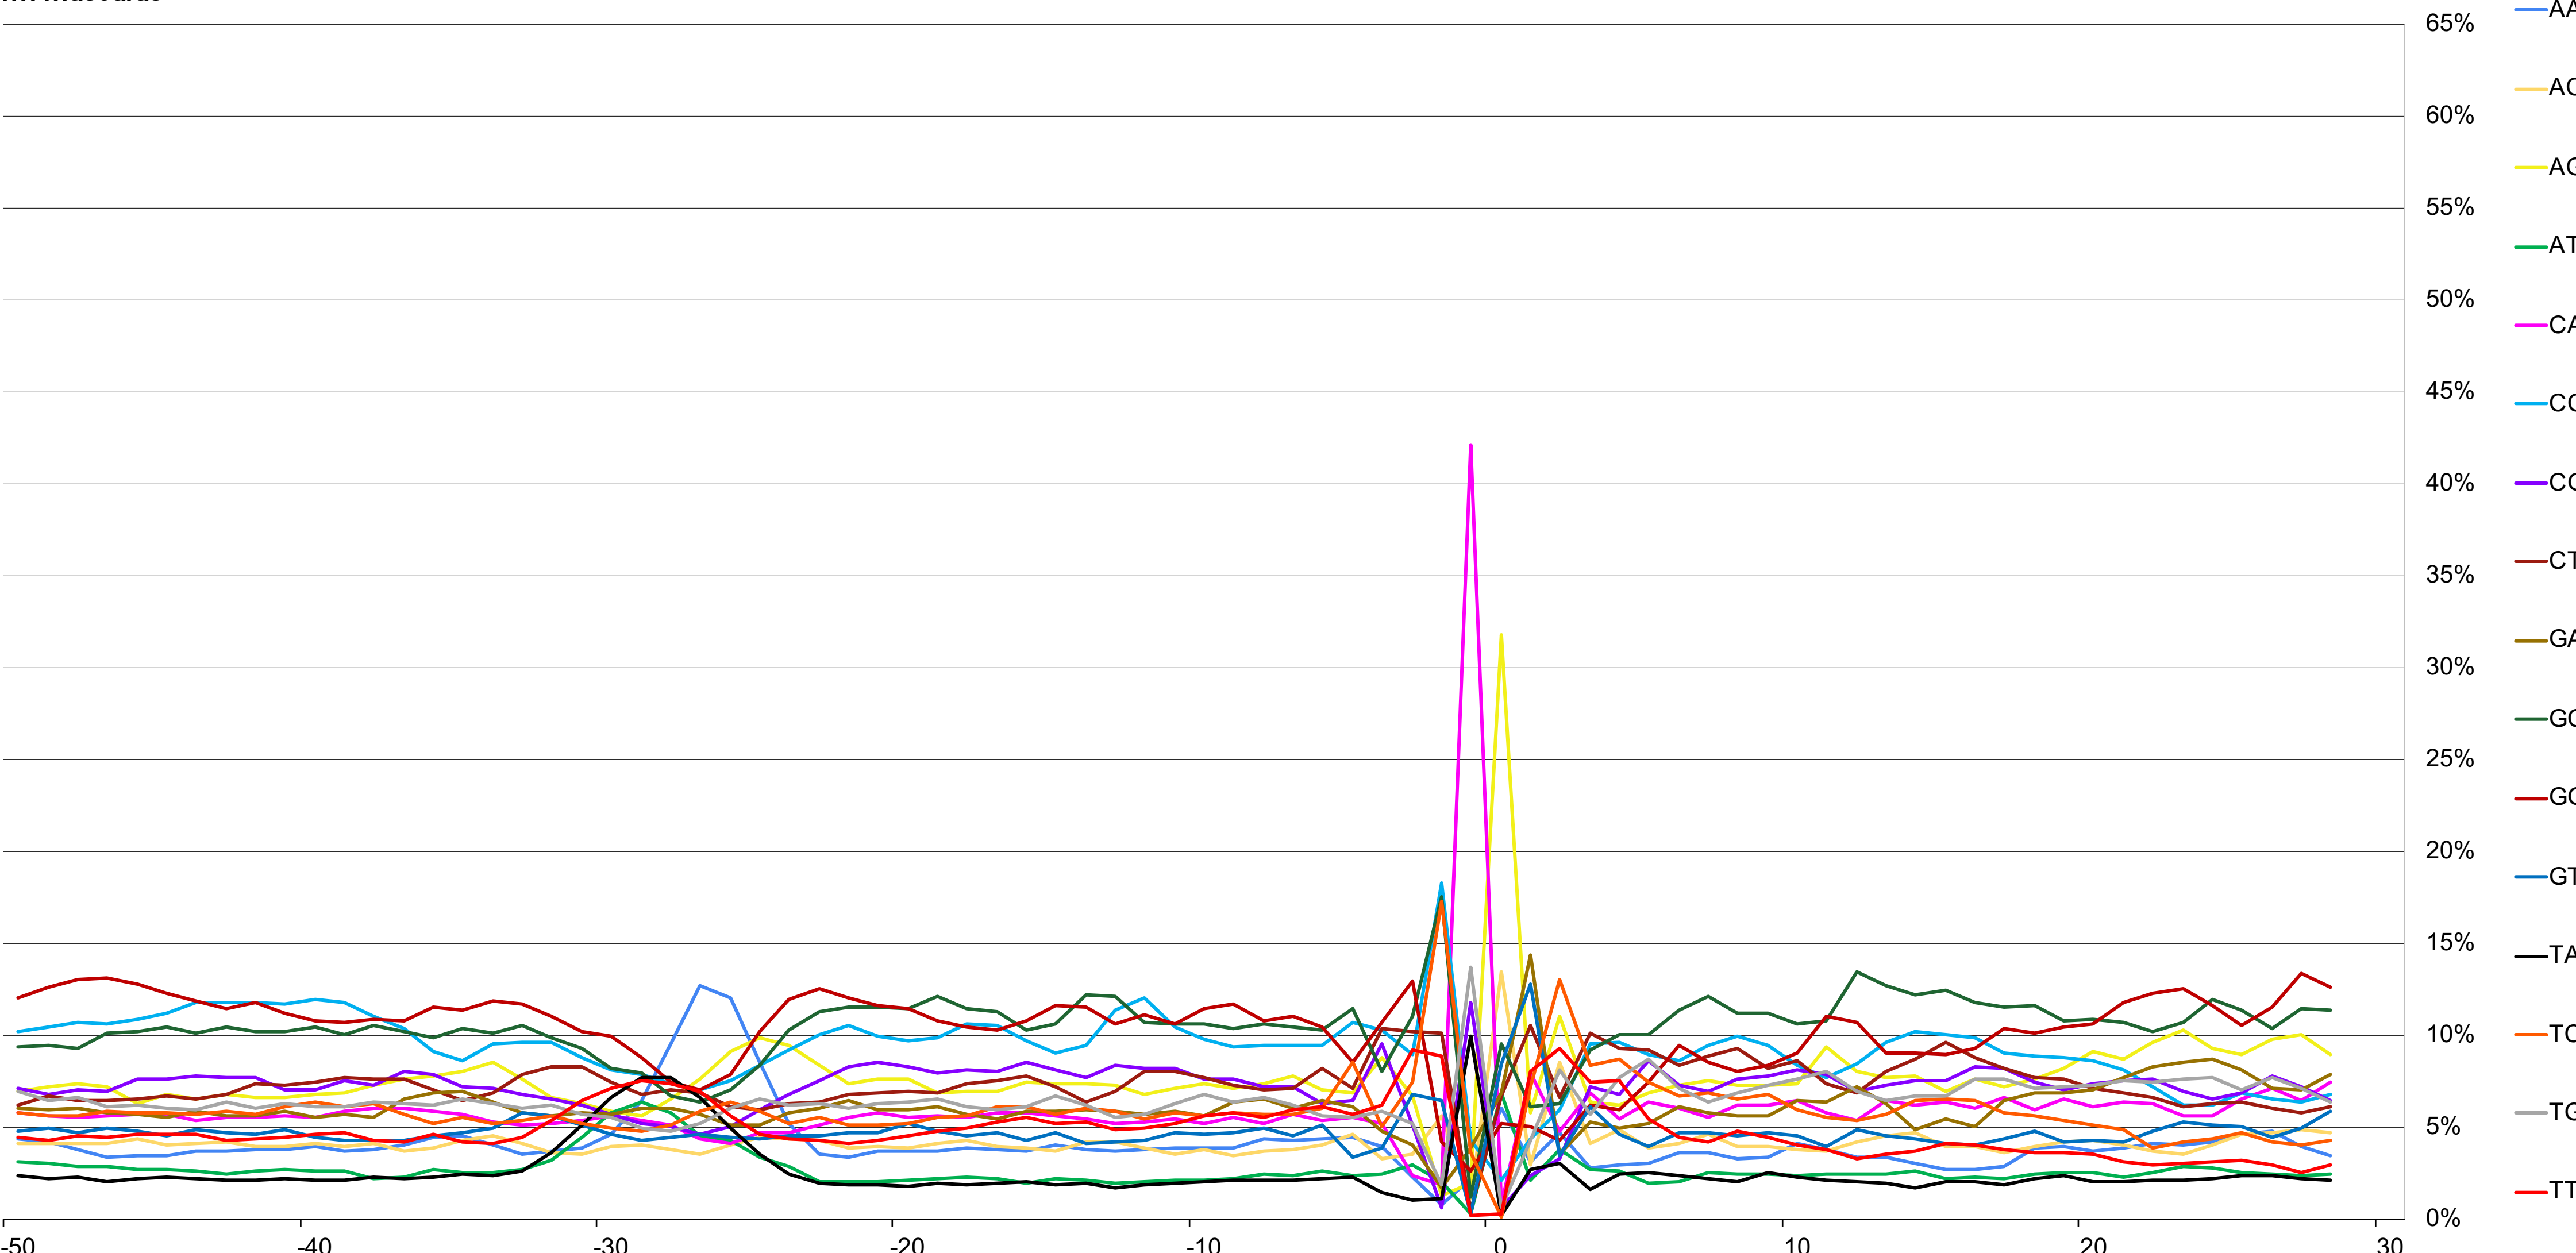

*R. norvegicus*

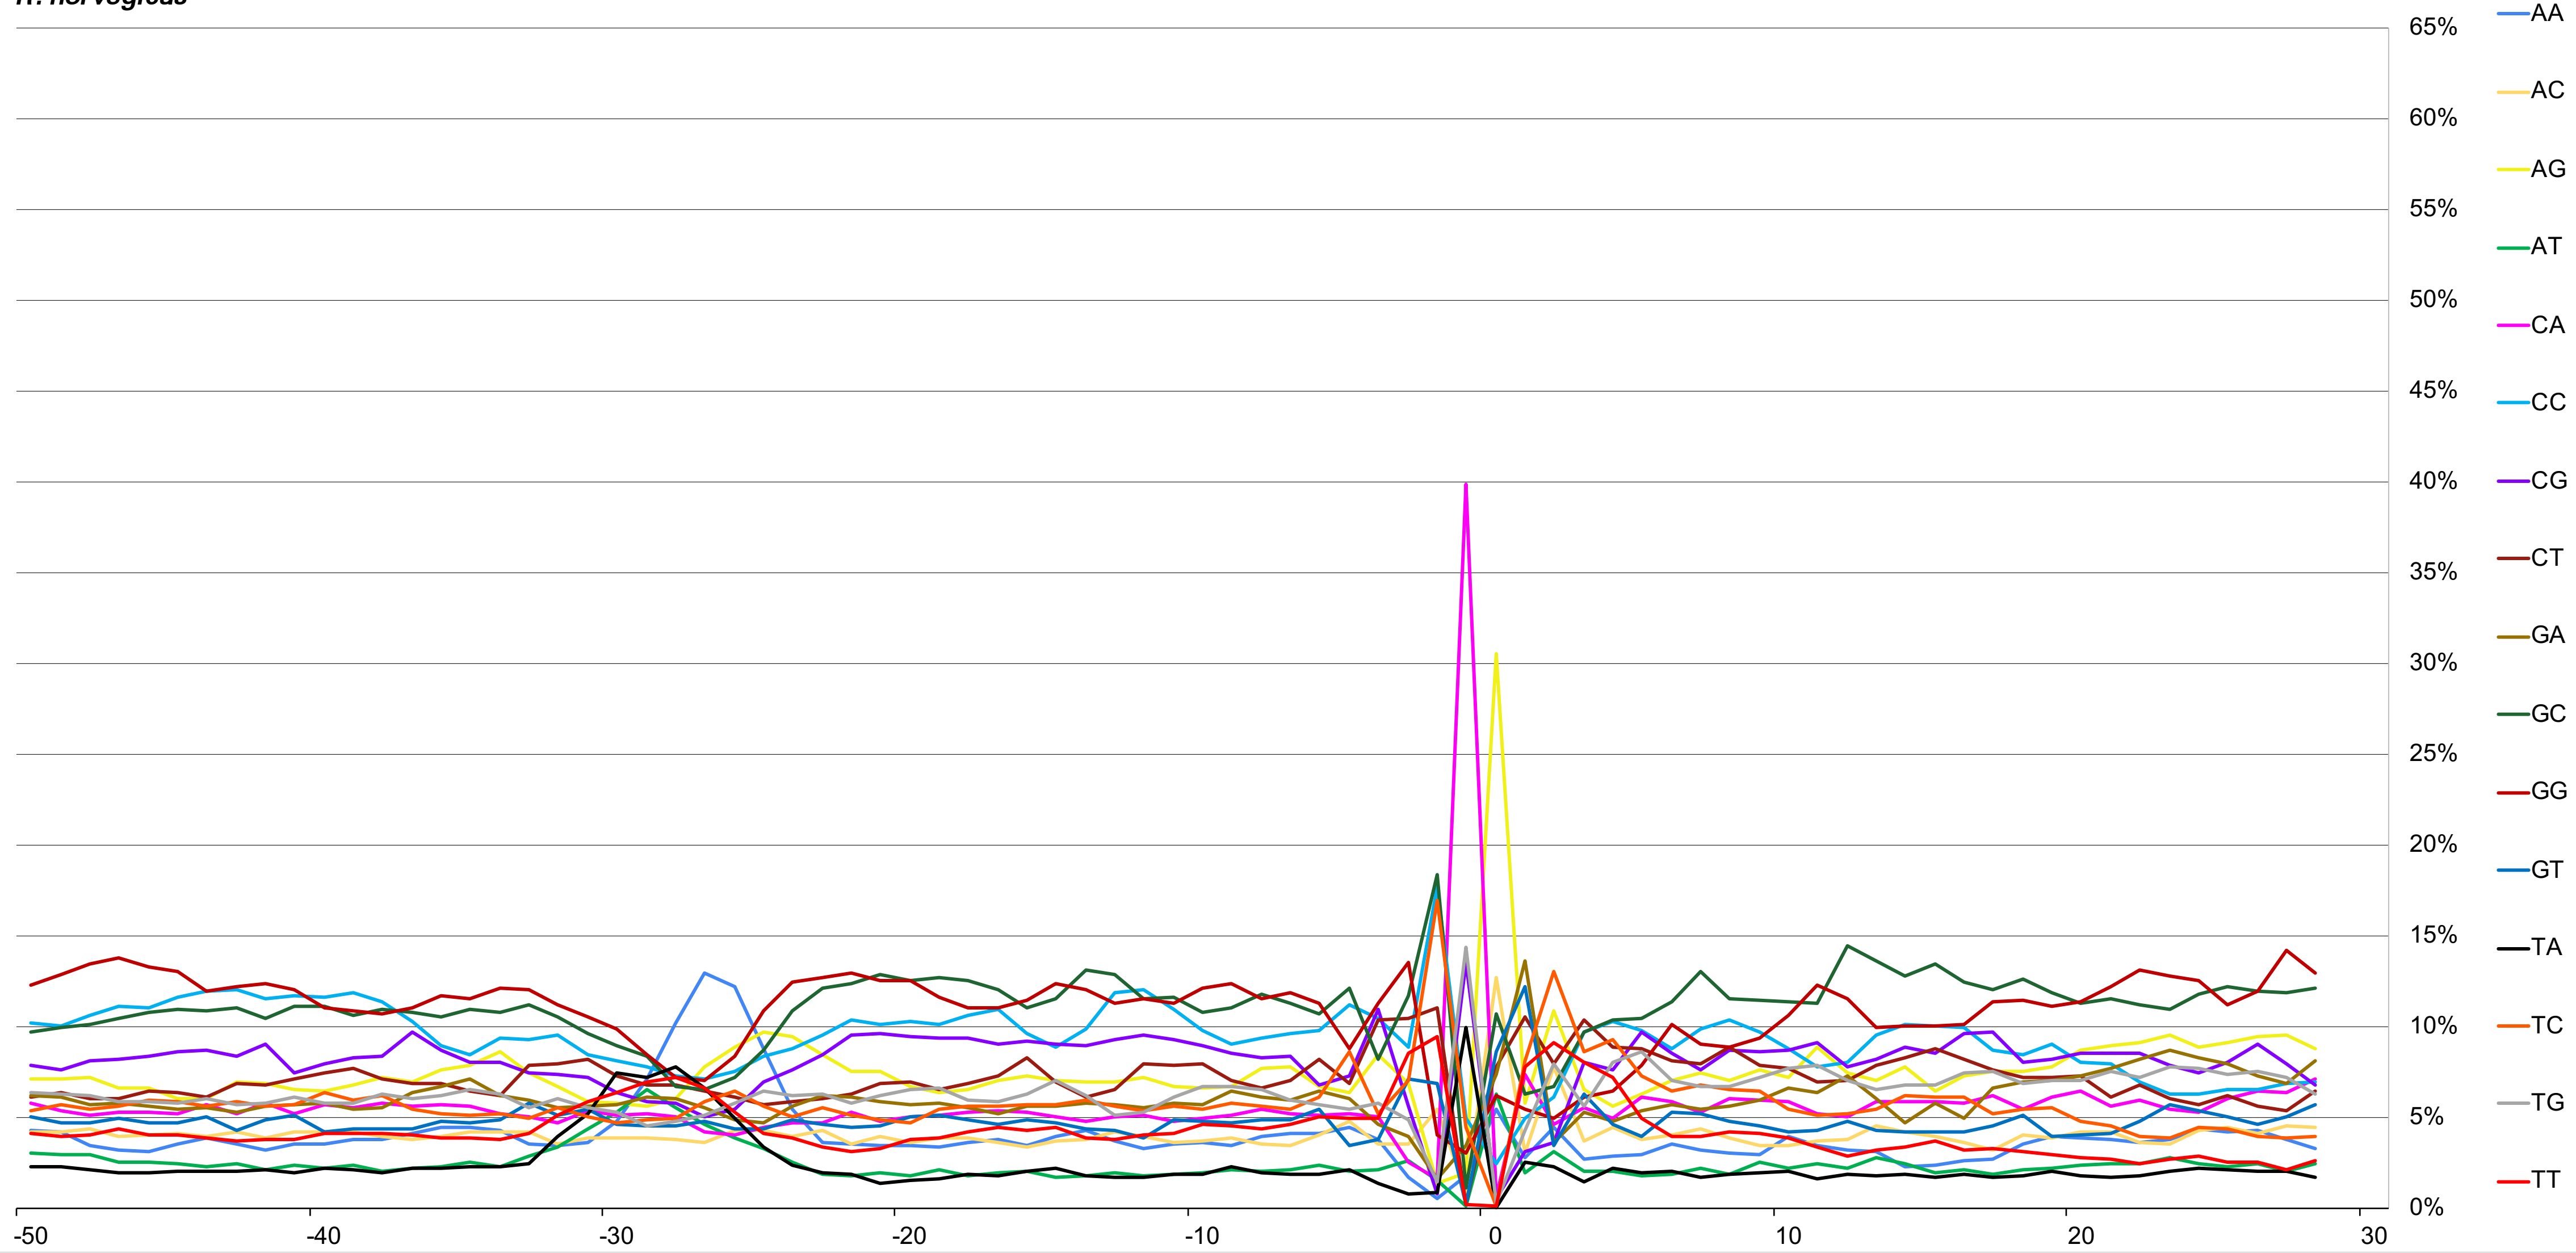

*G. gallus*

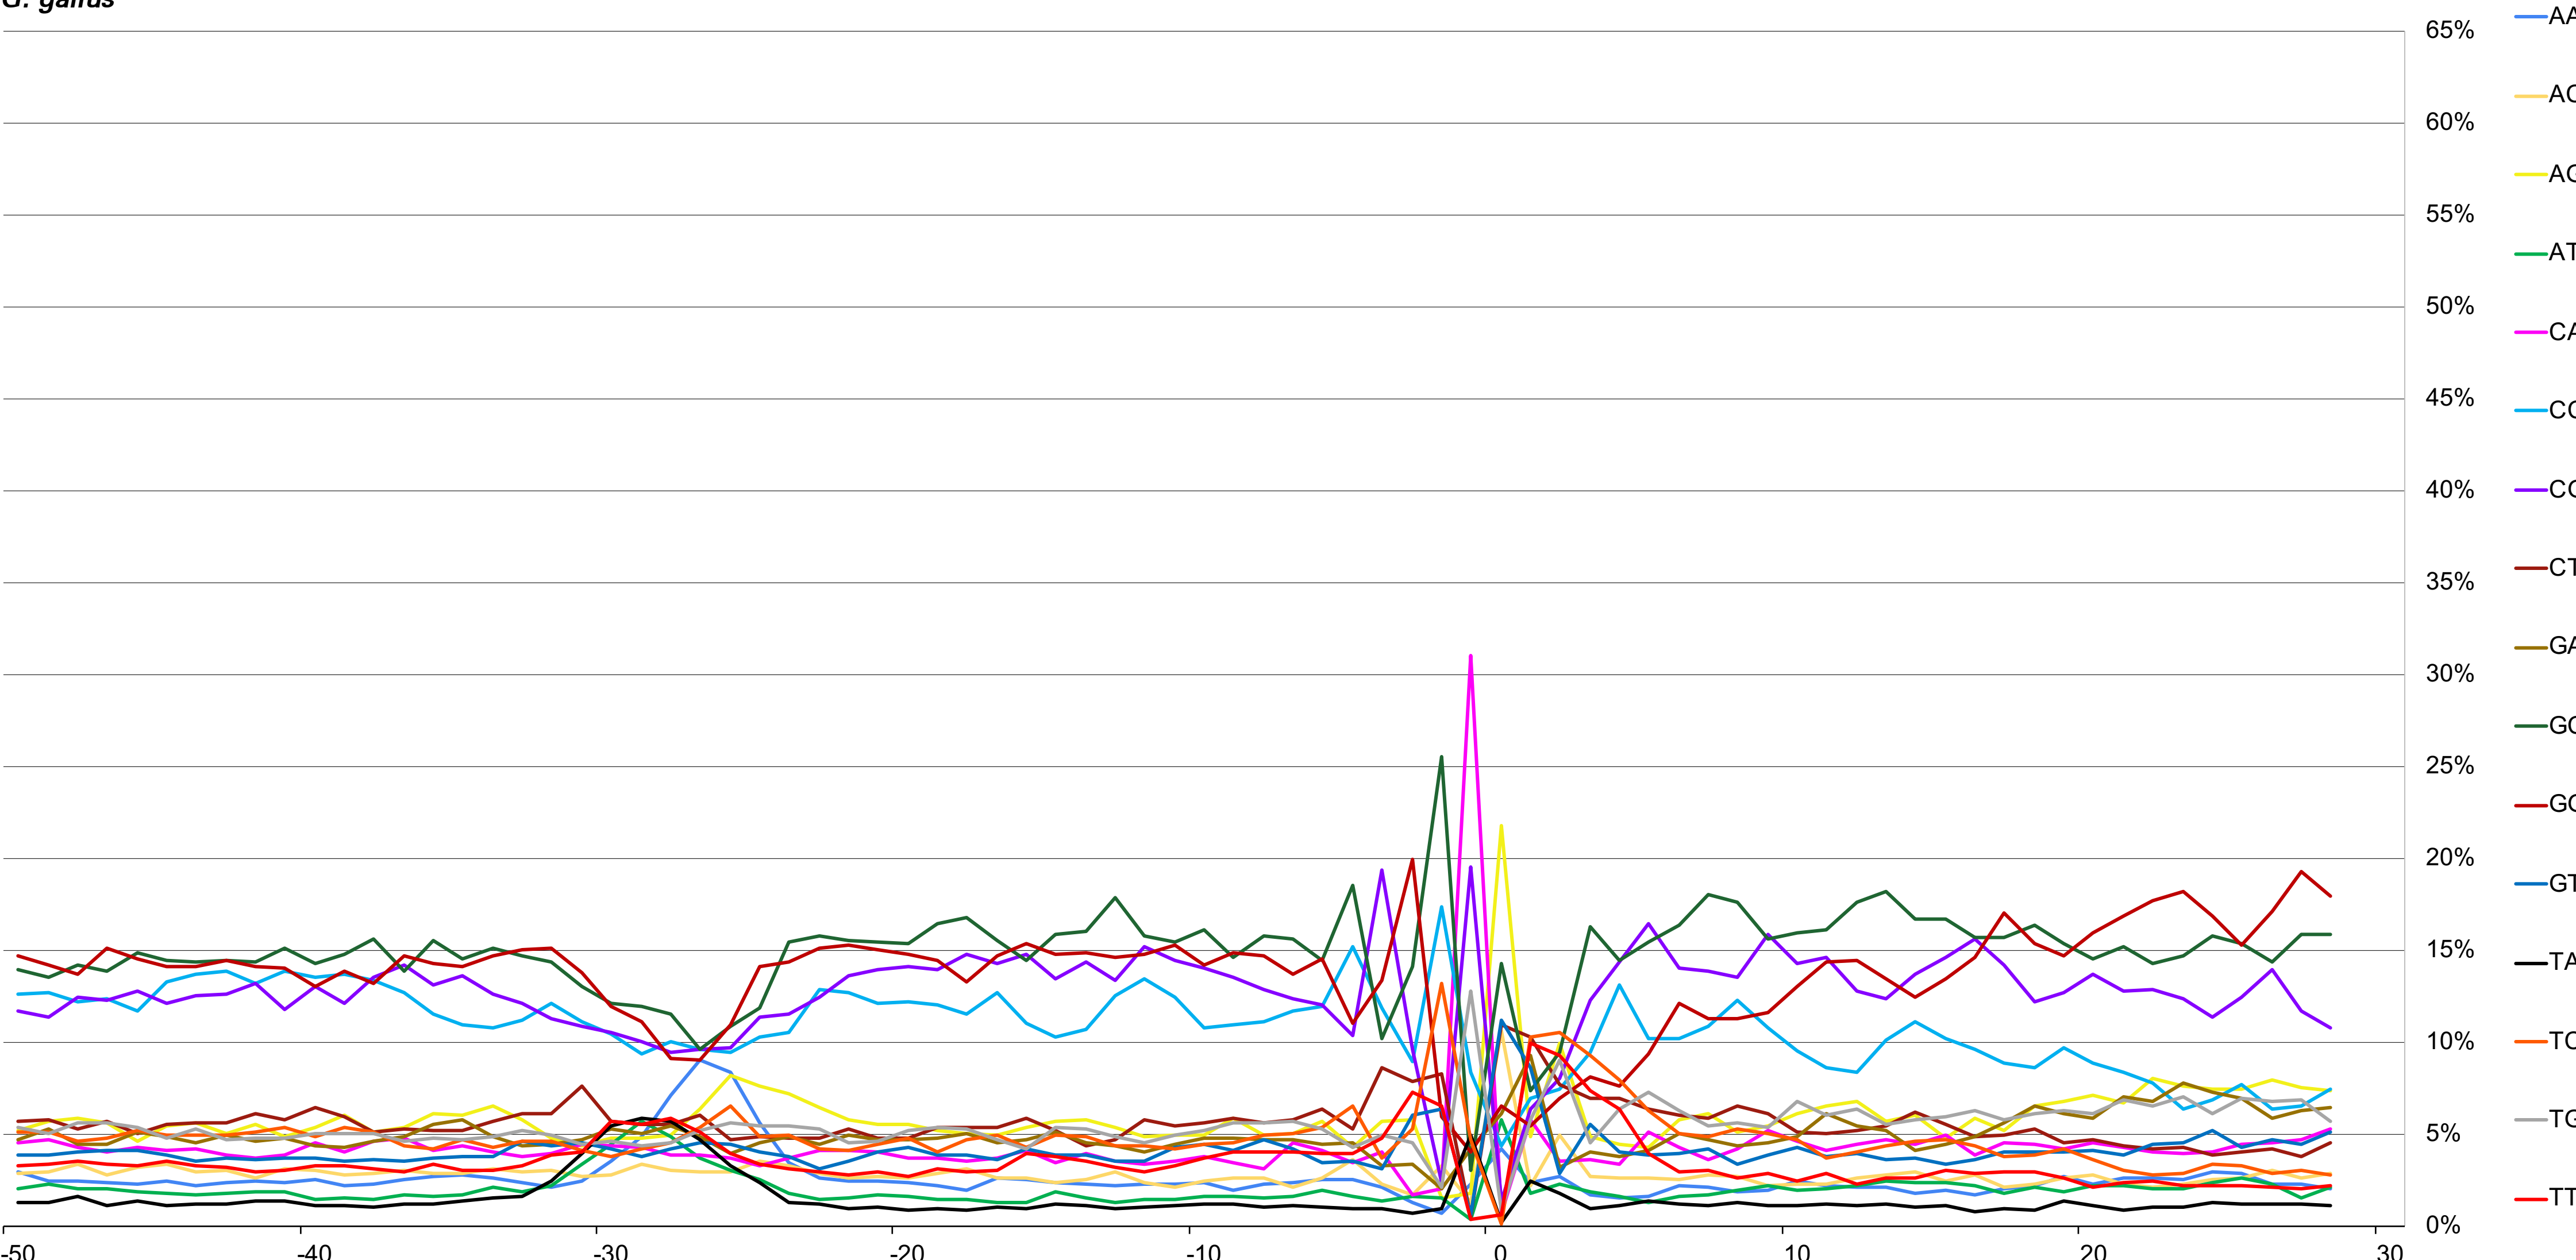

*C. familiaris*

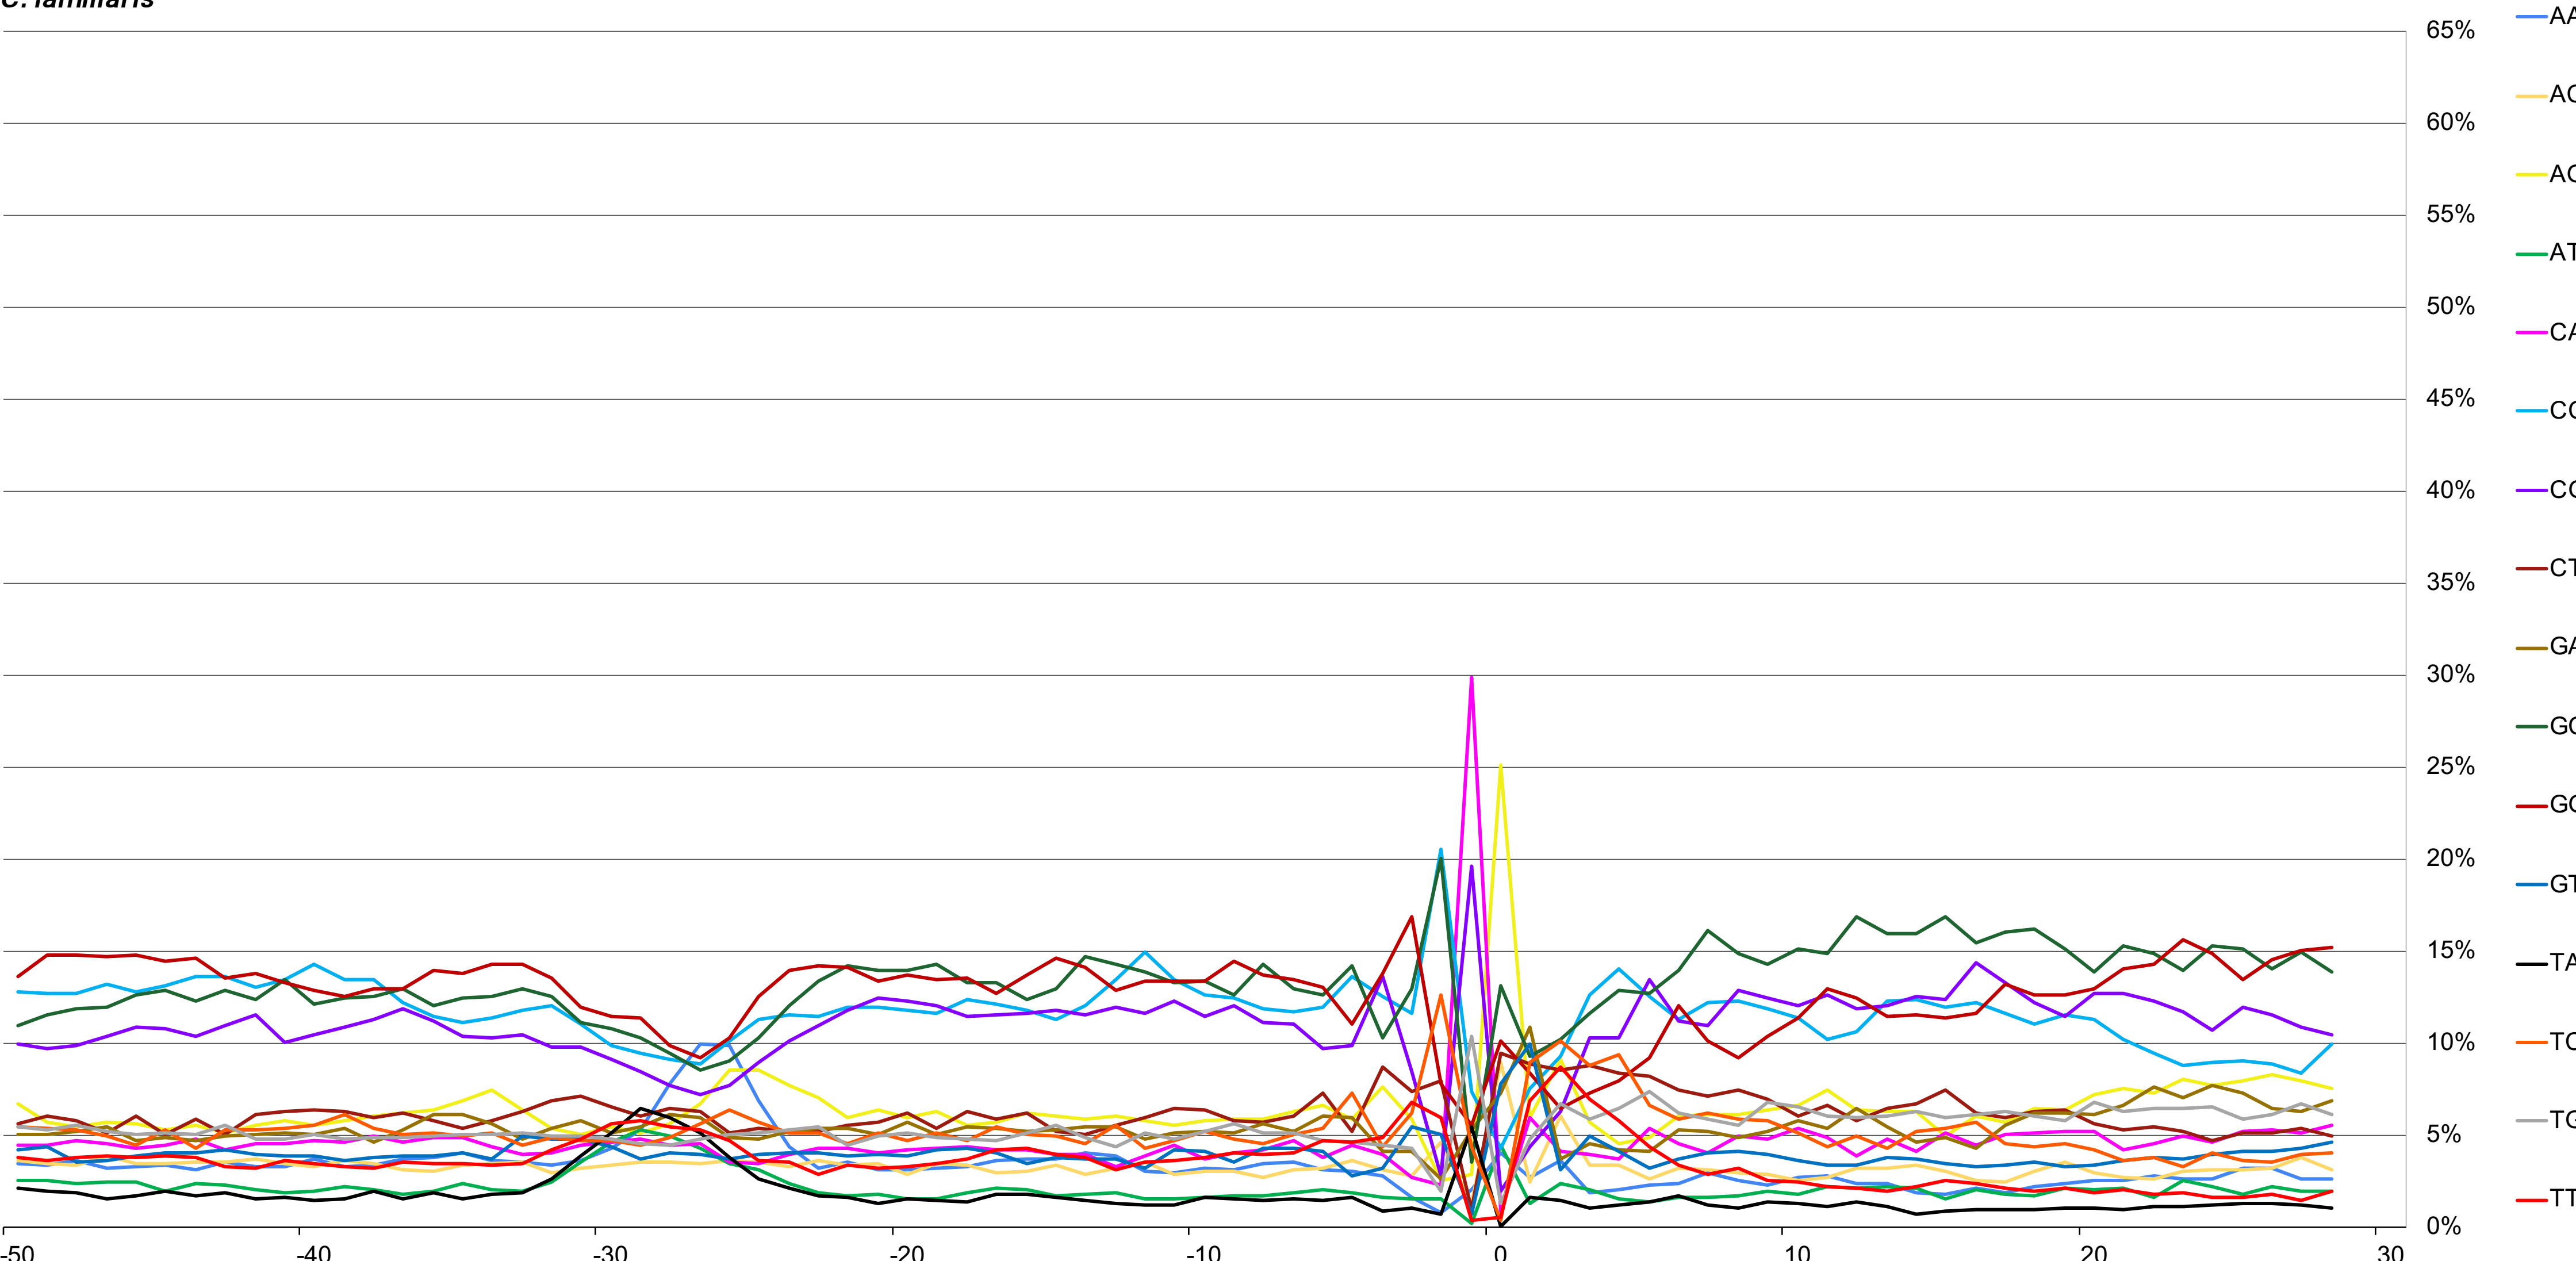



*D. melanogaster*

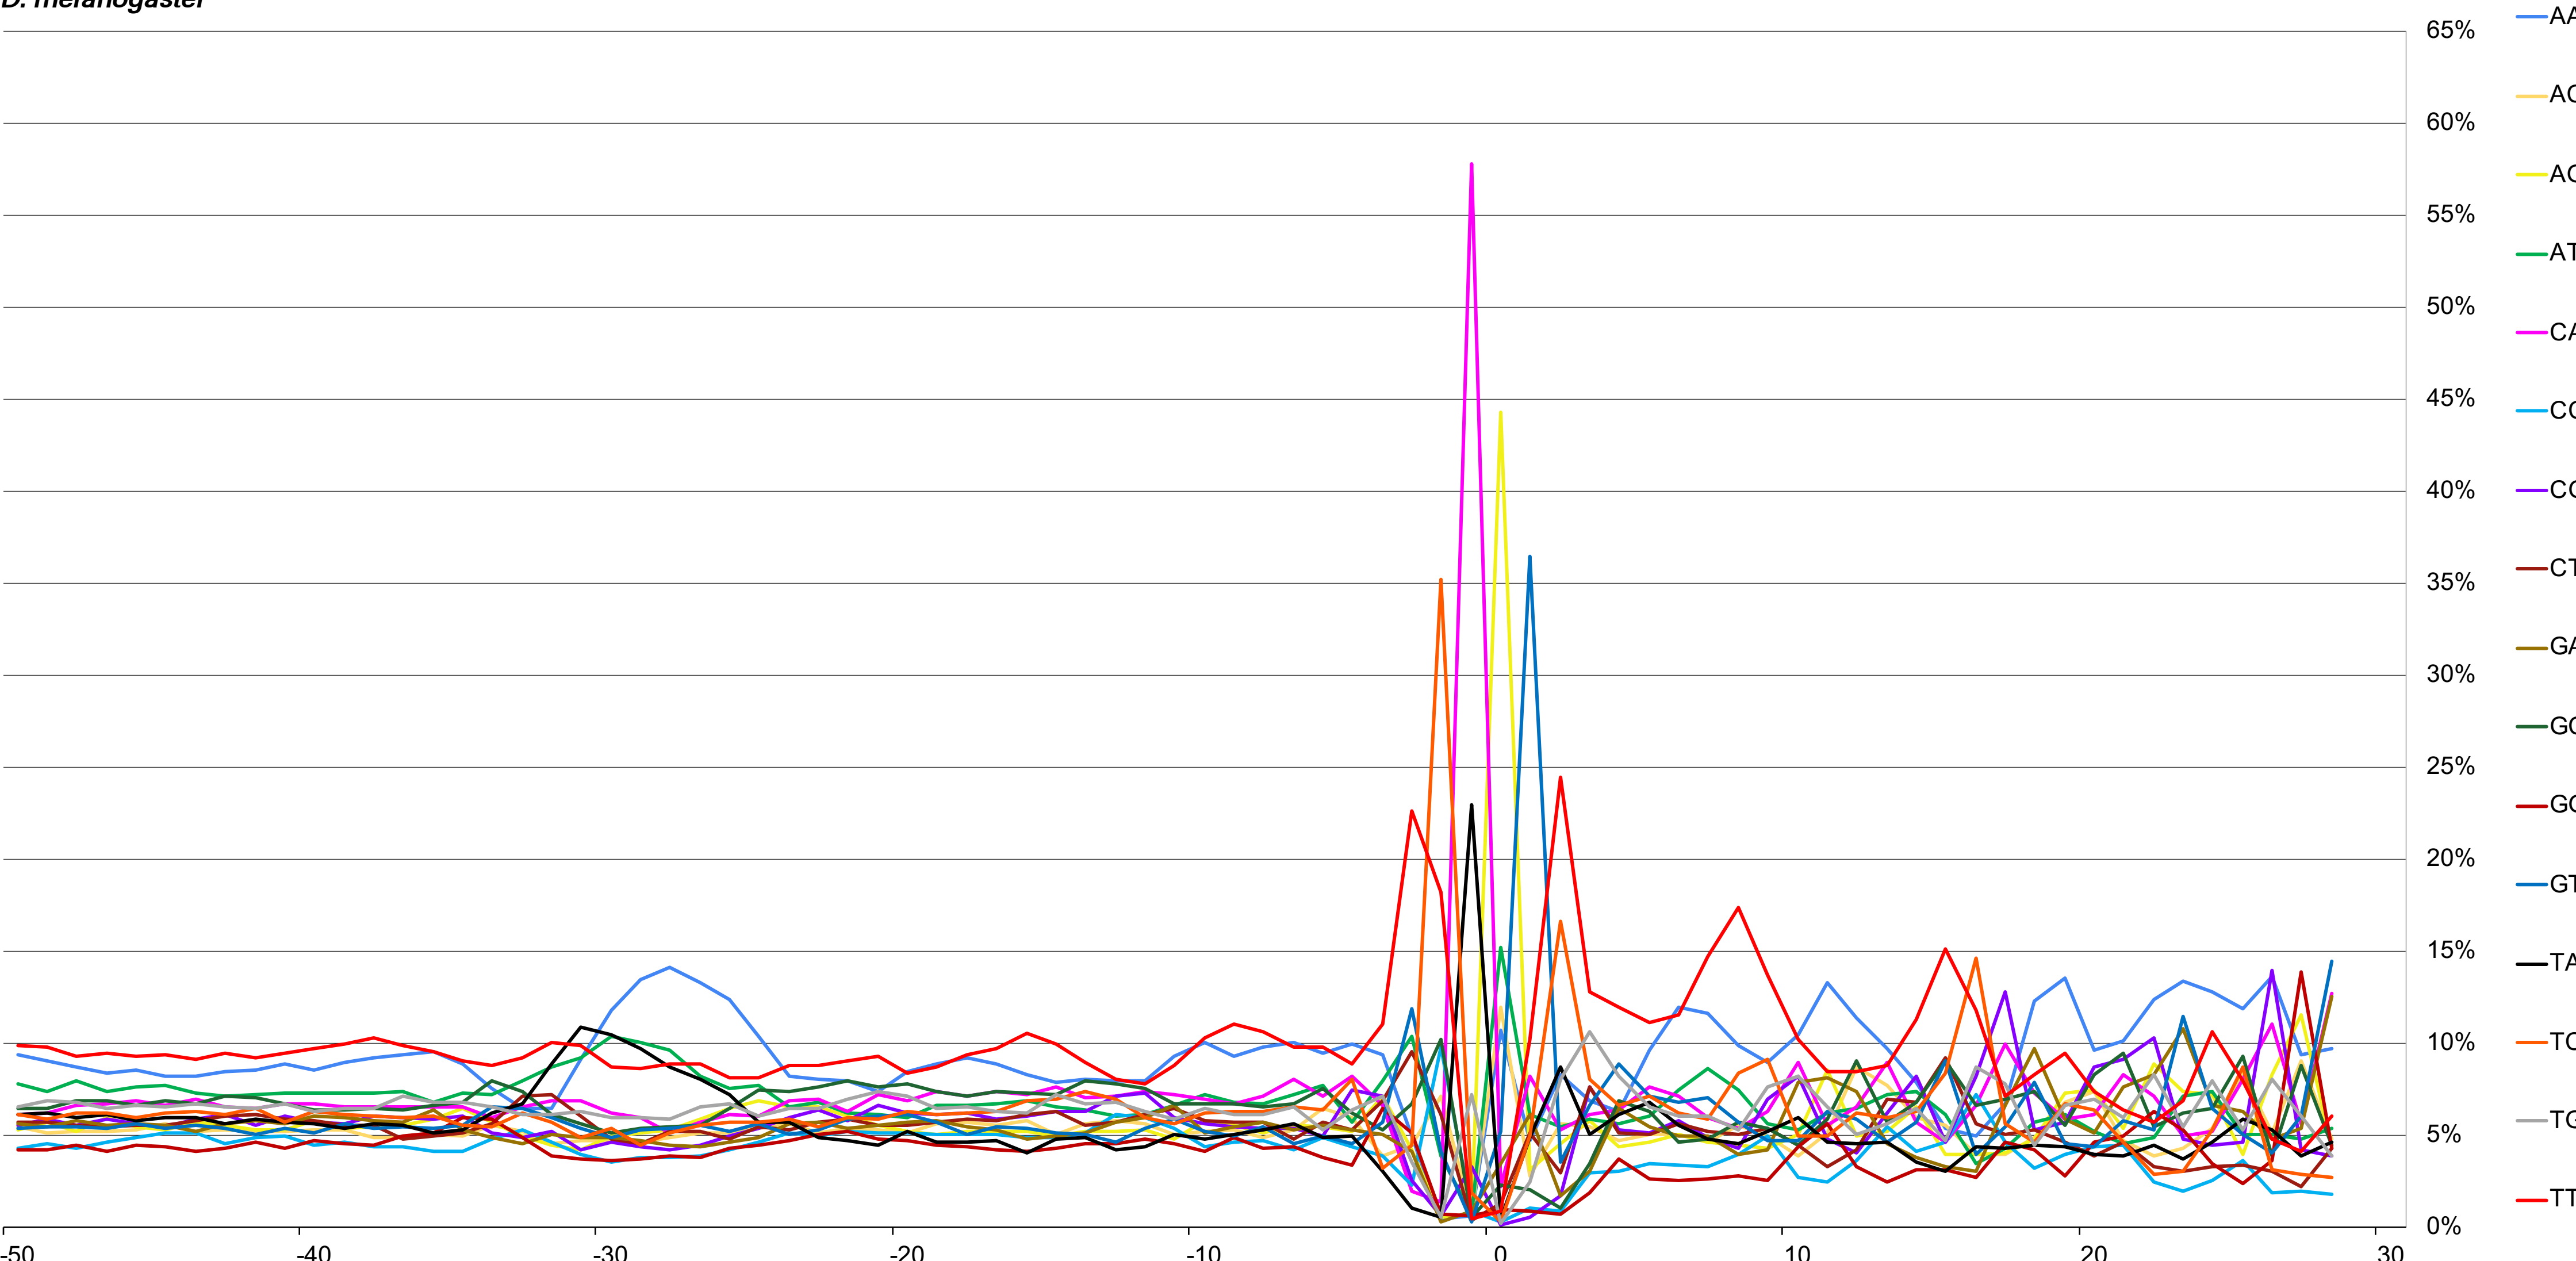

*A. mellifera*

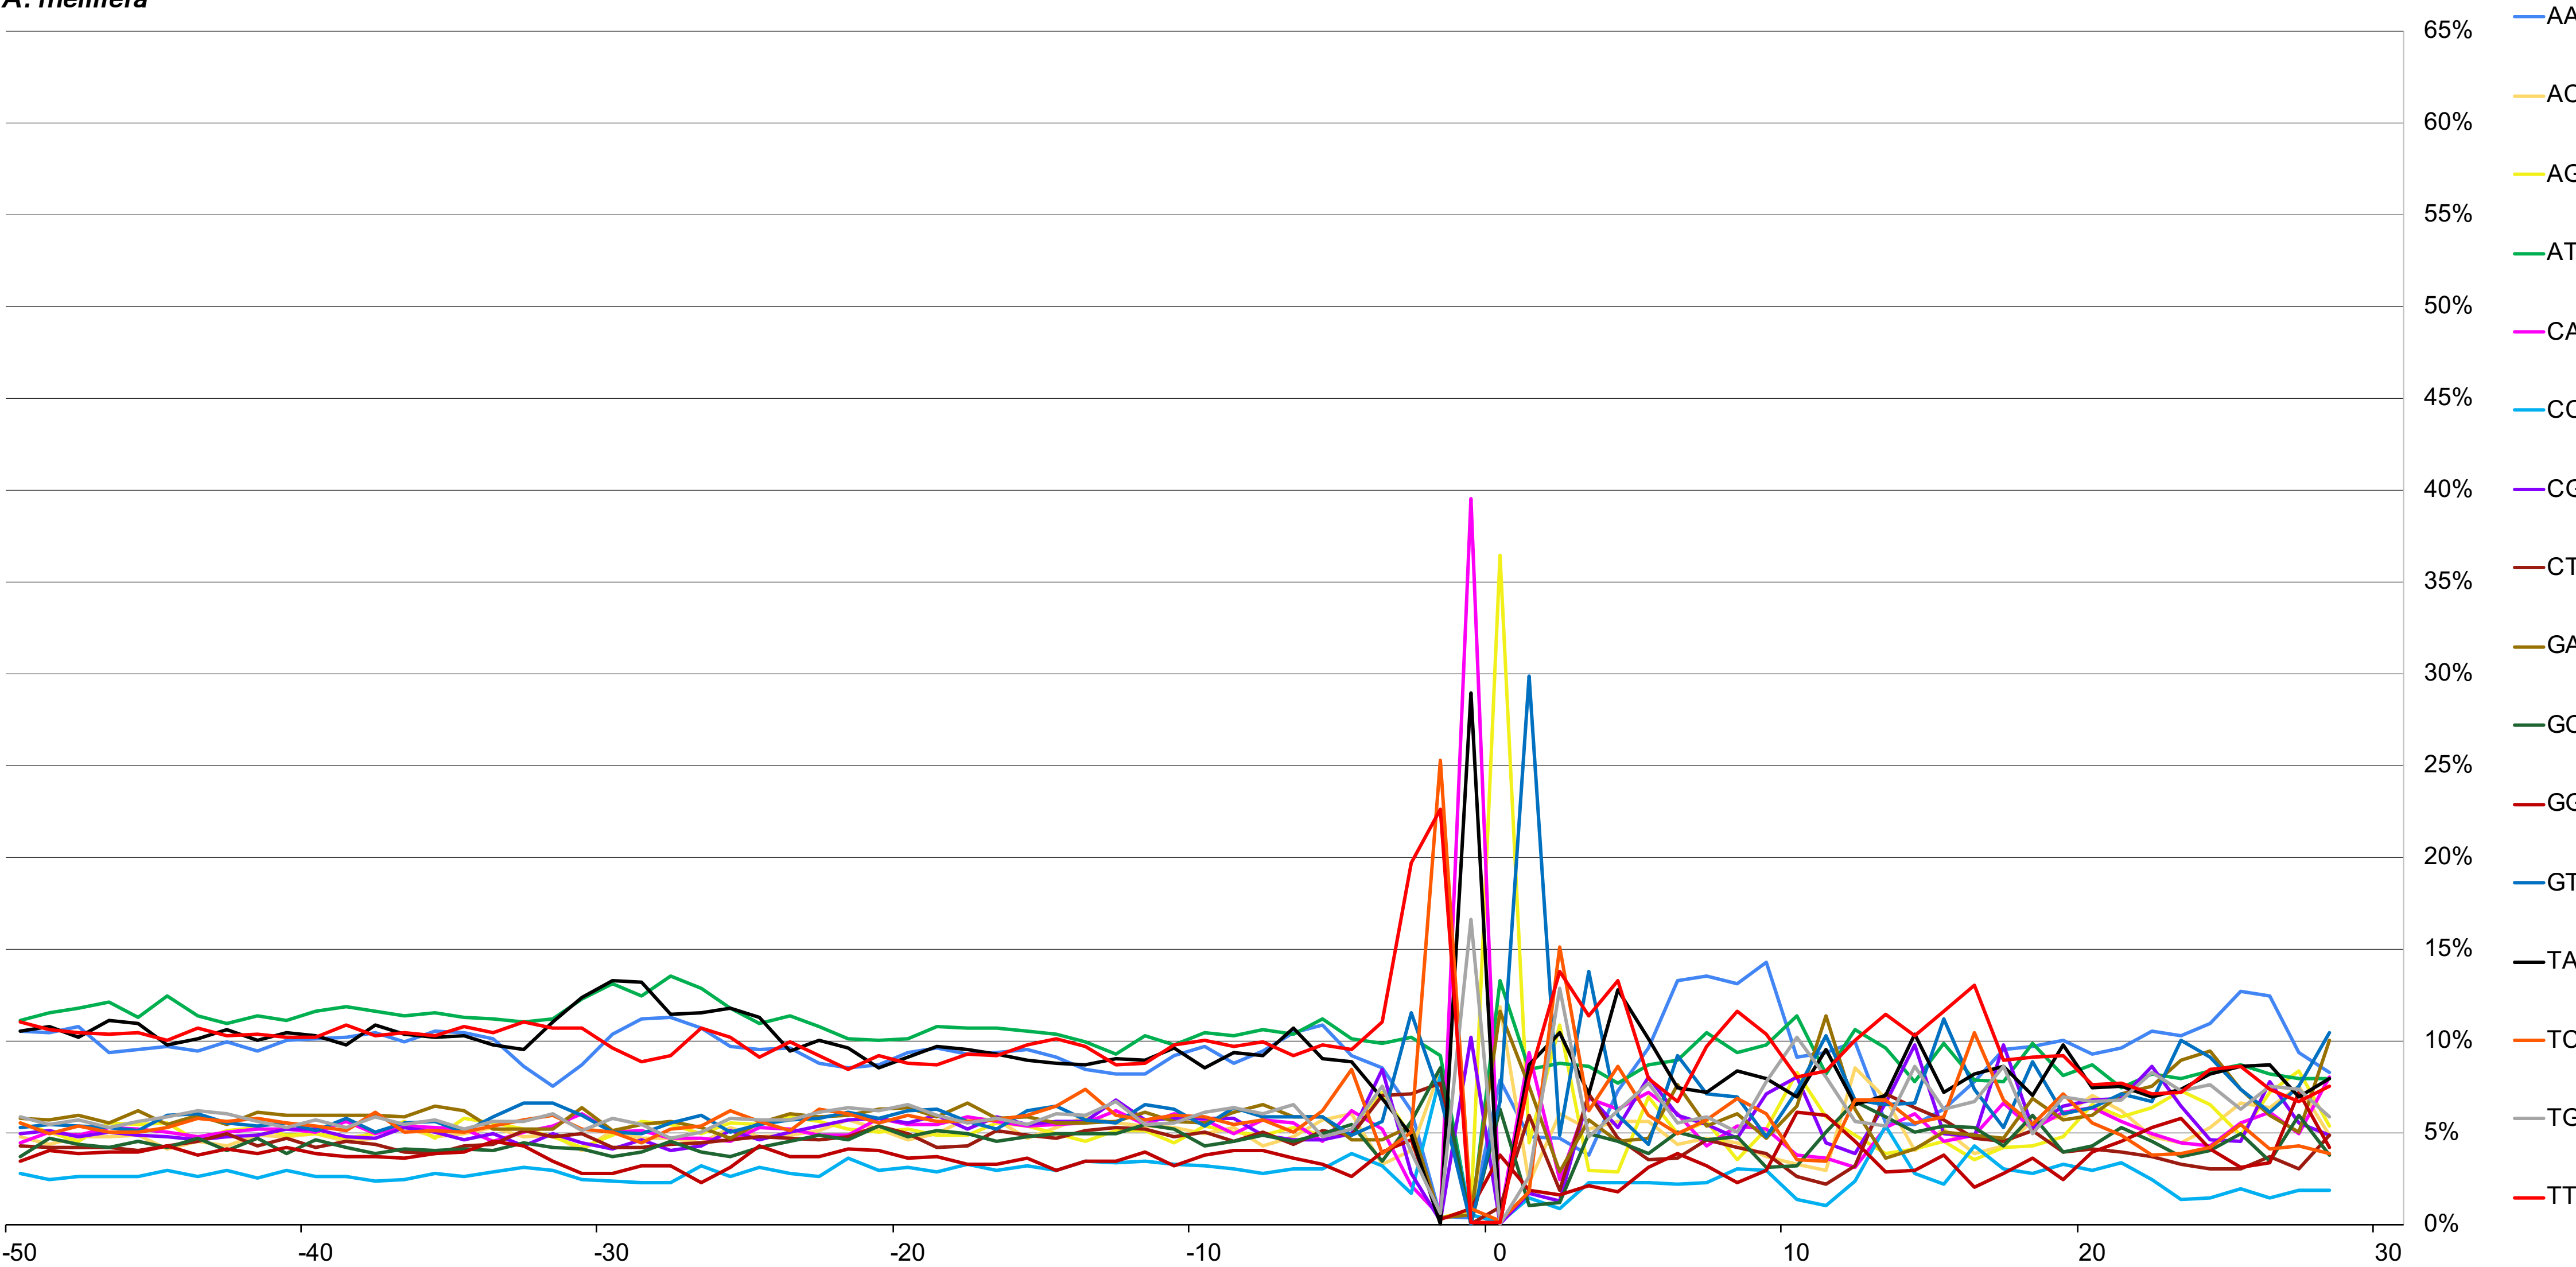



***D. rerio***

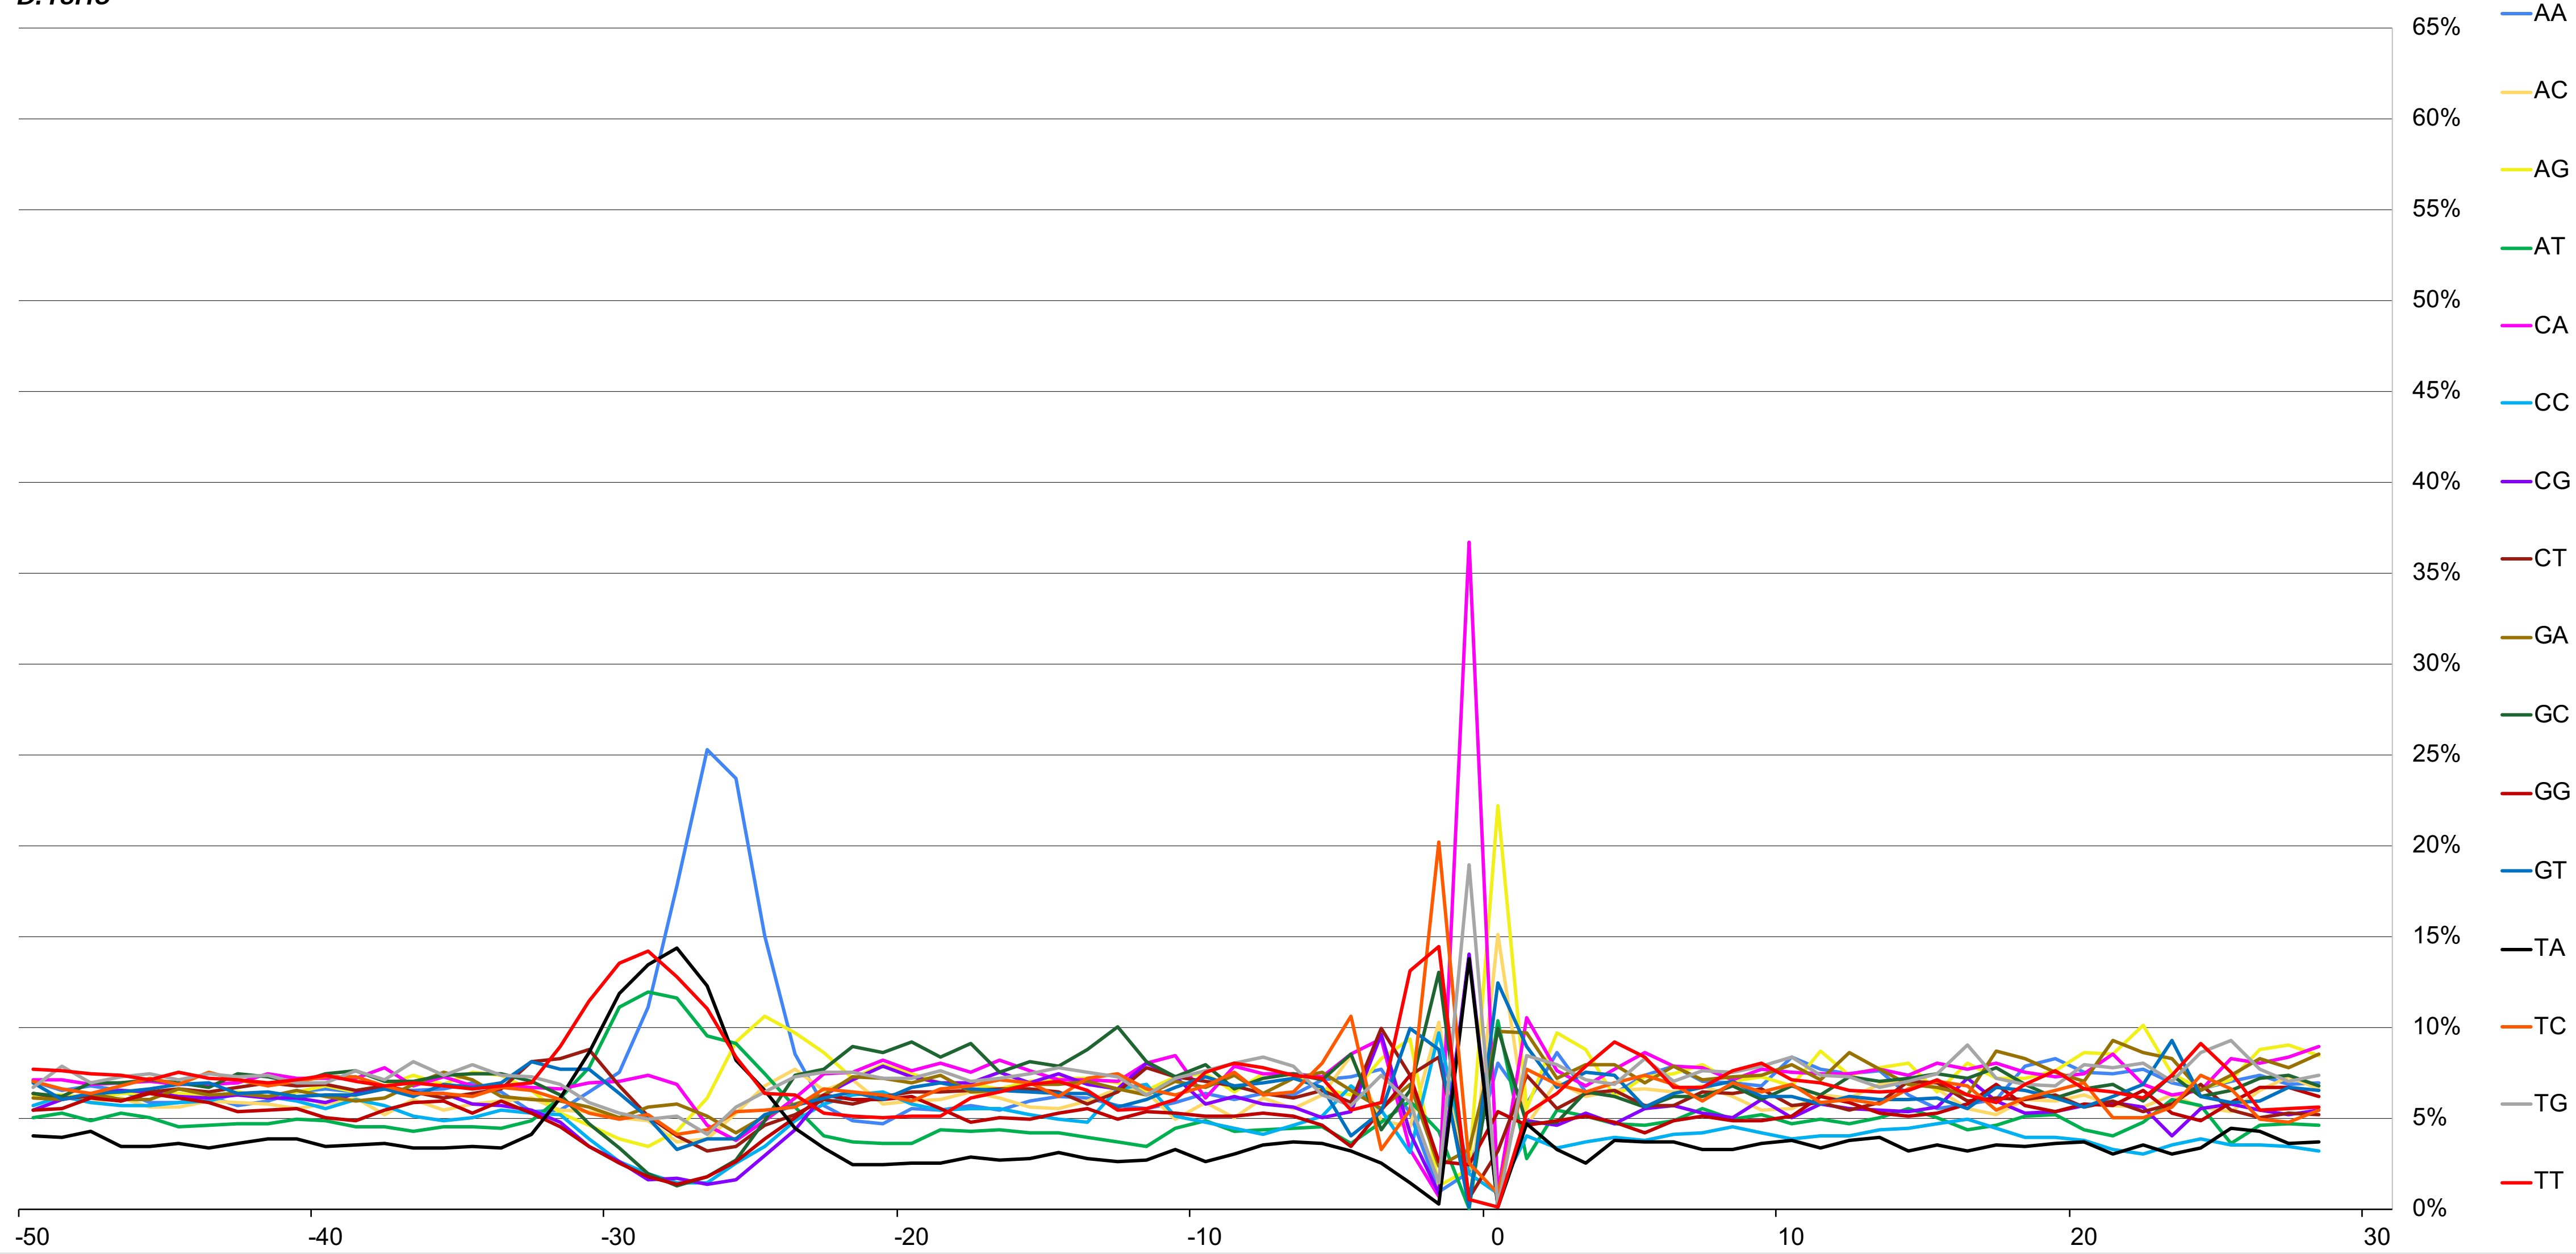

*C. elegans*

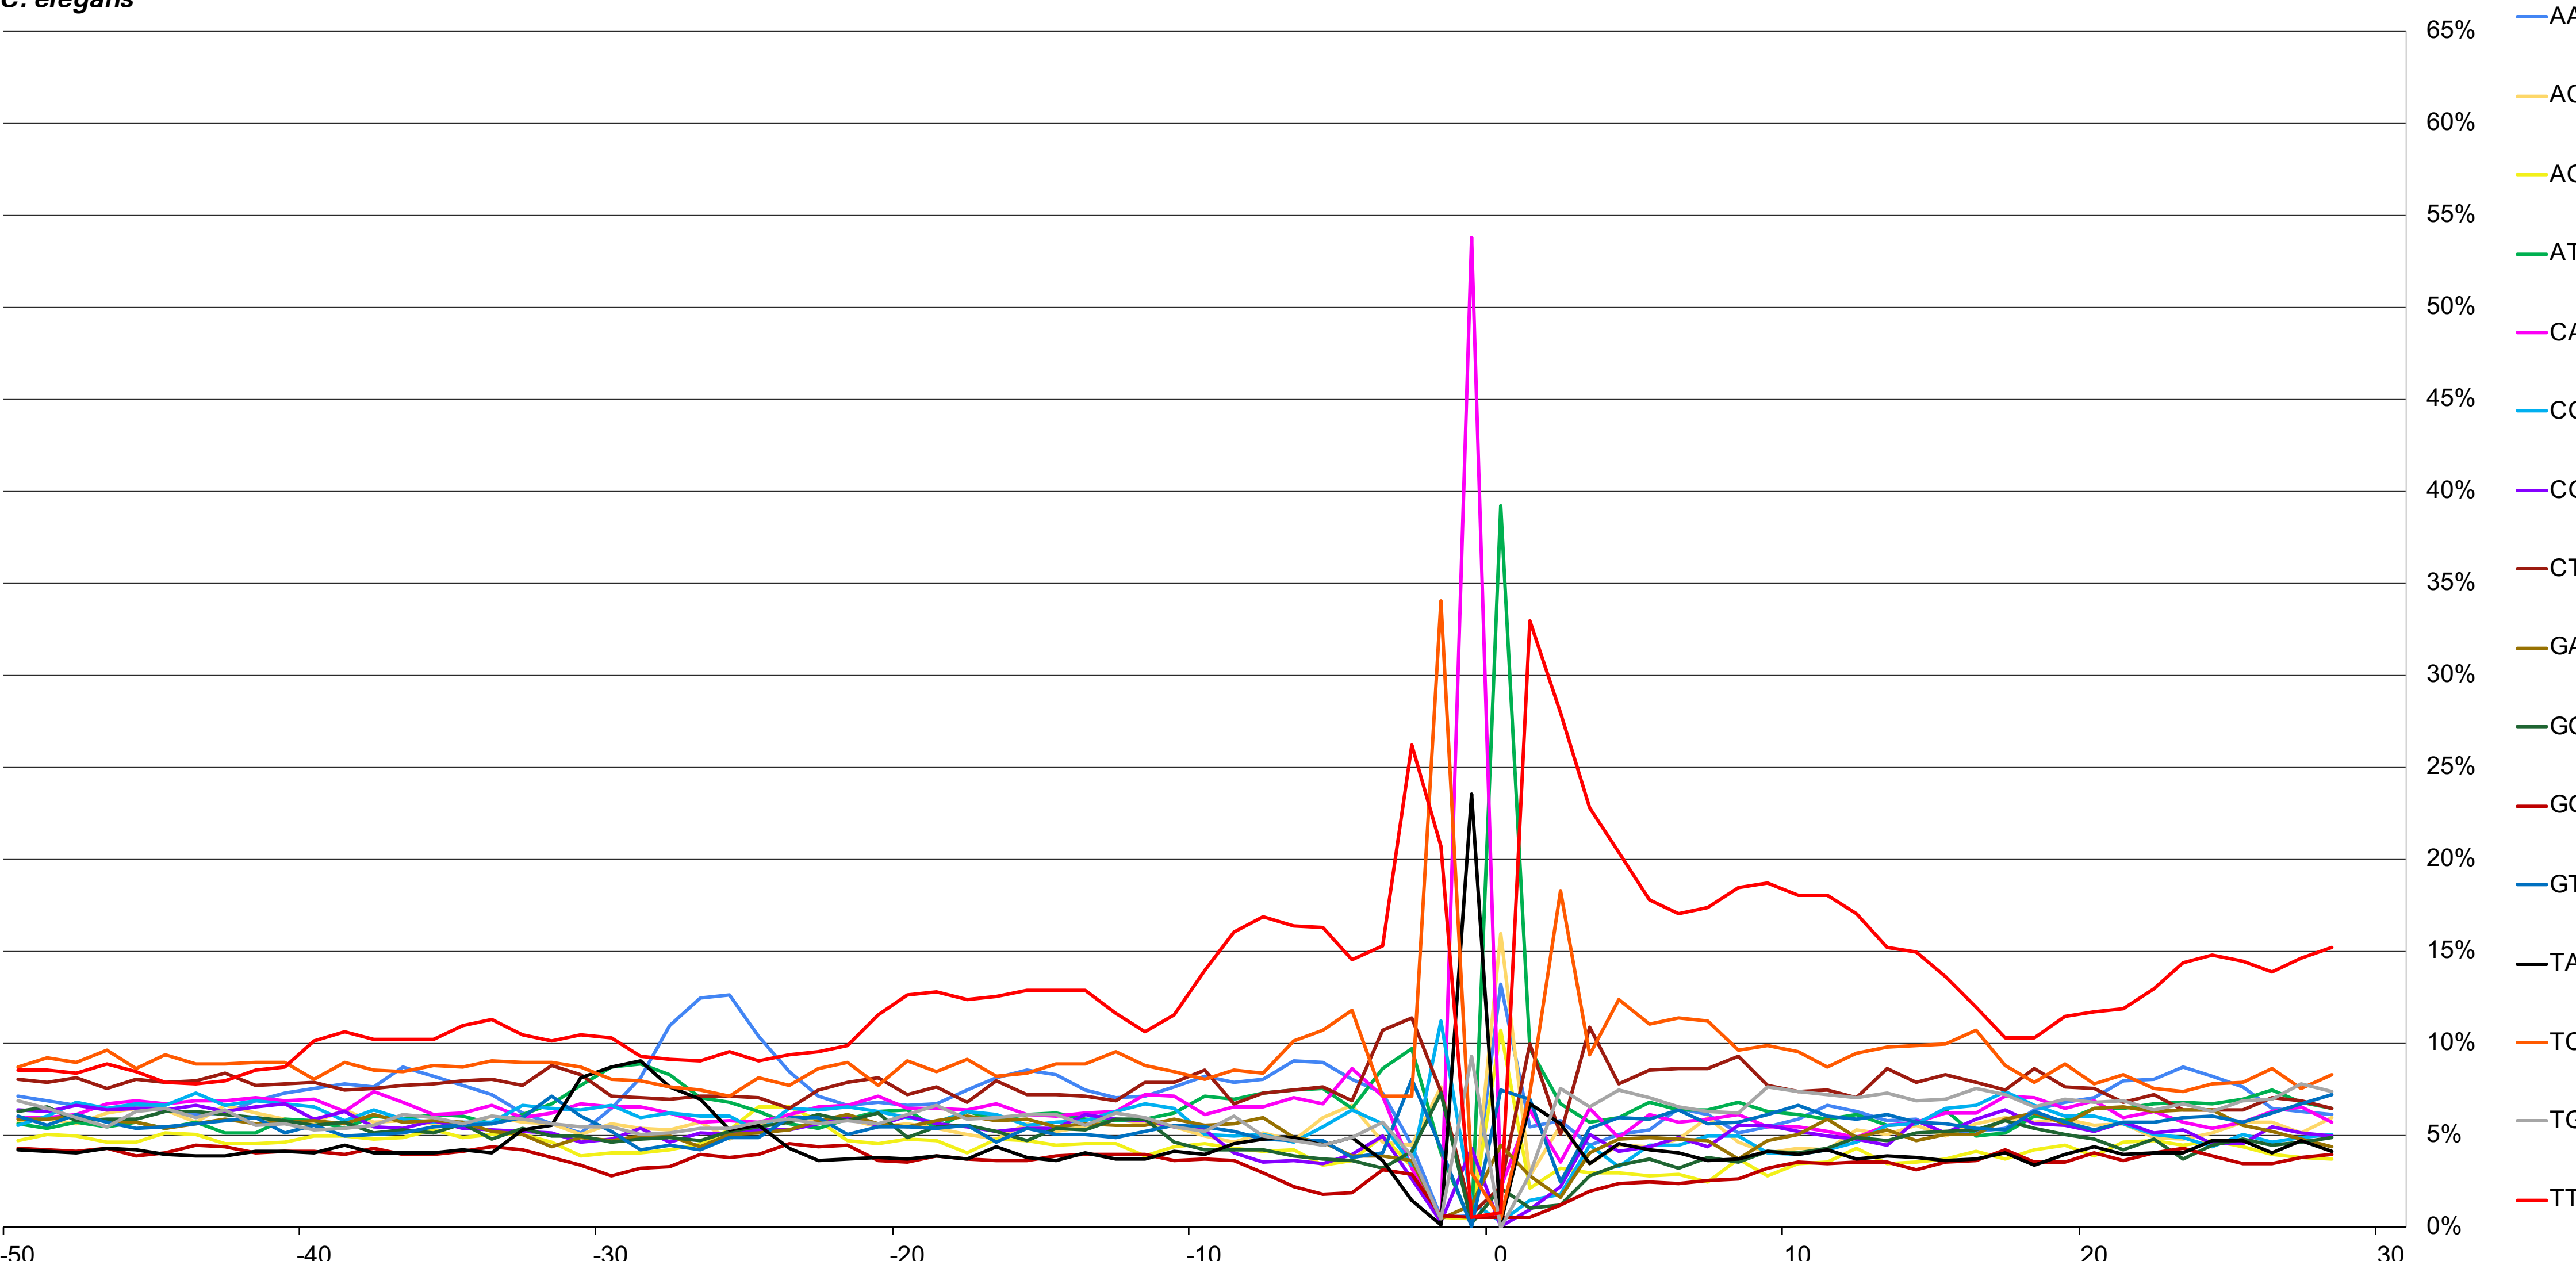

*A. thaliana*

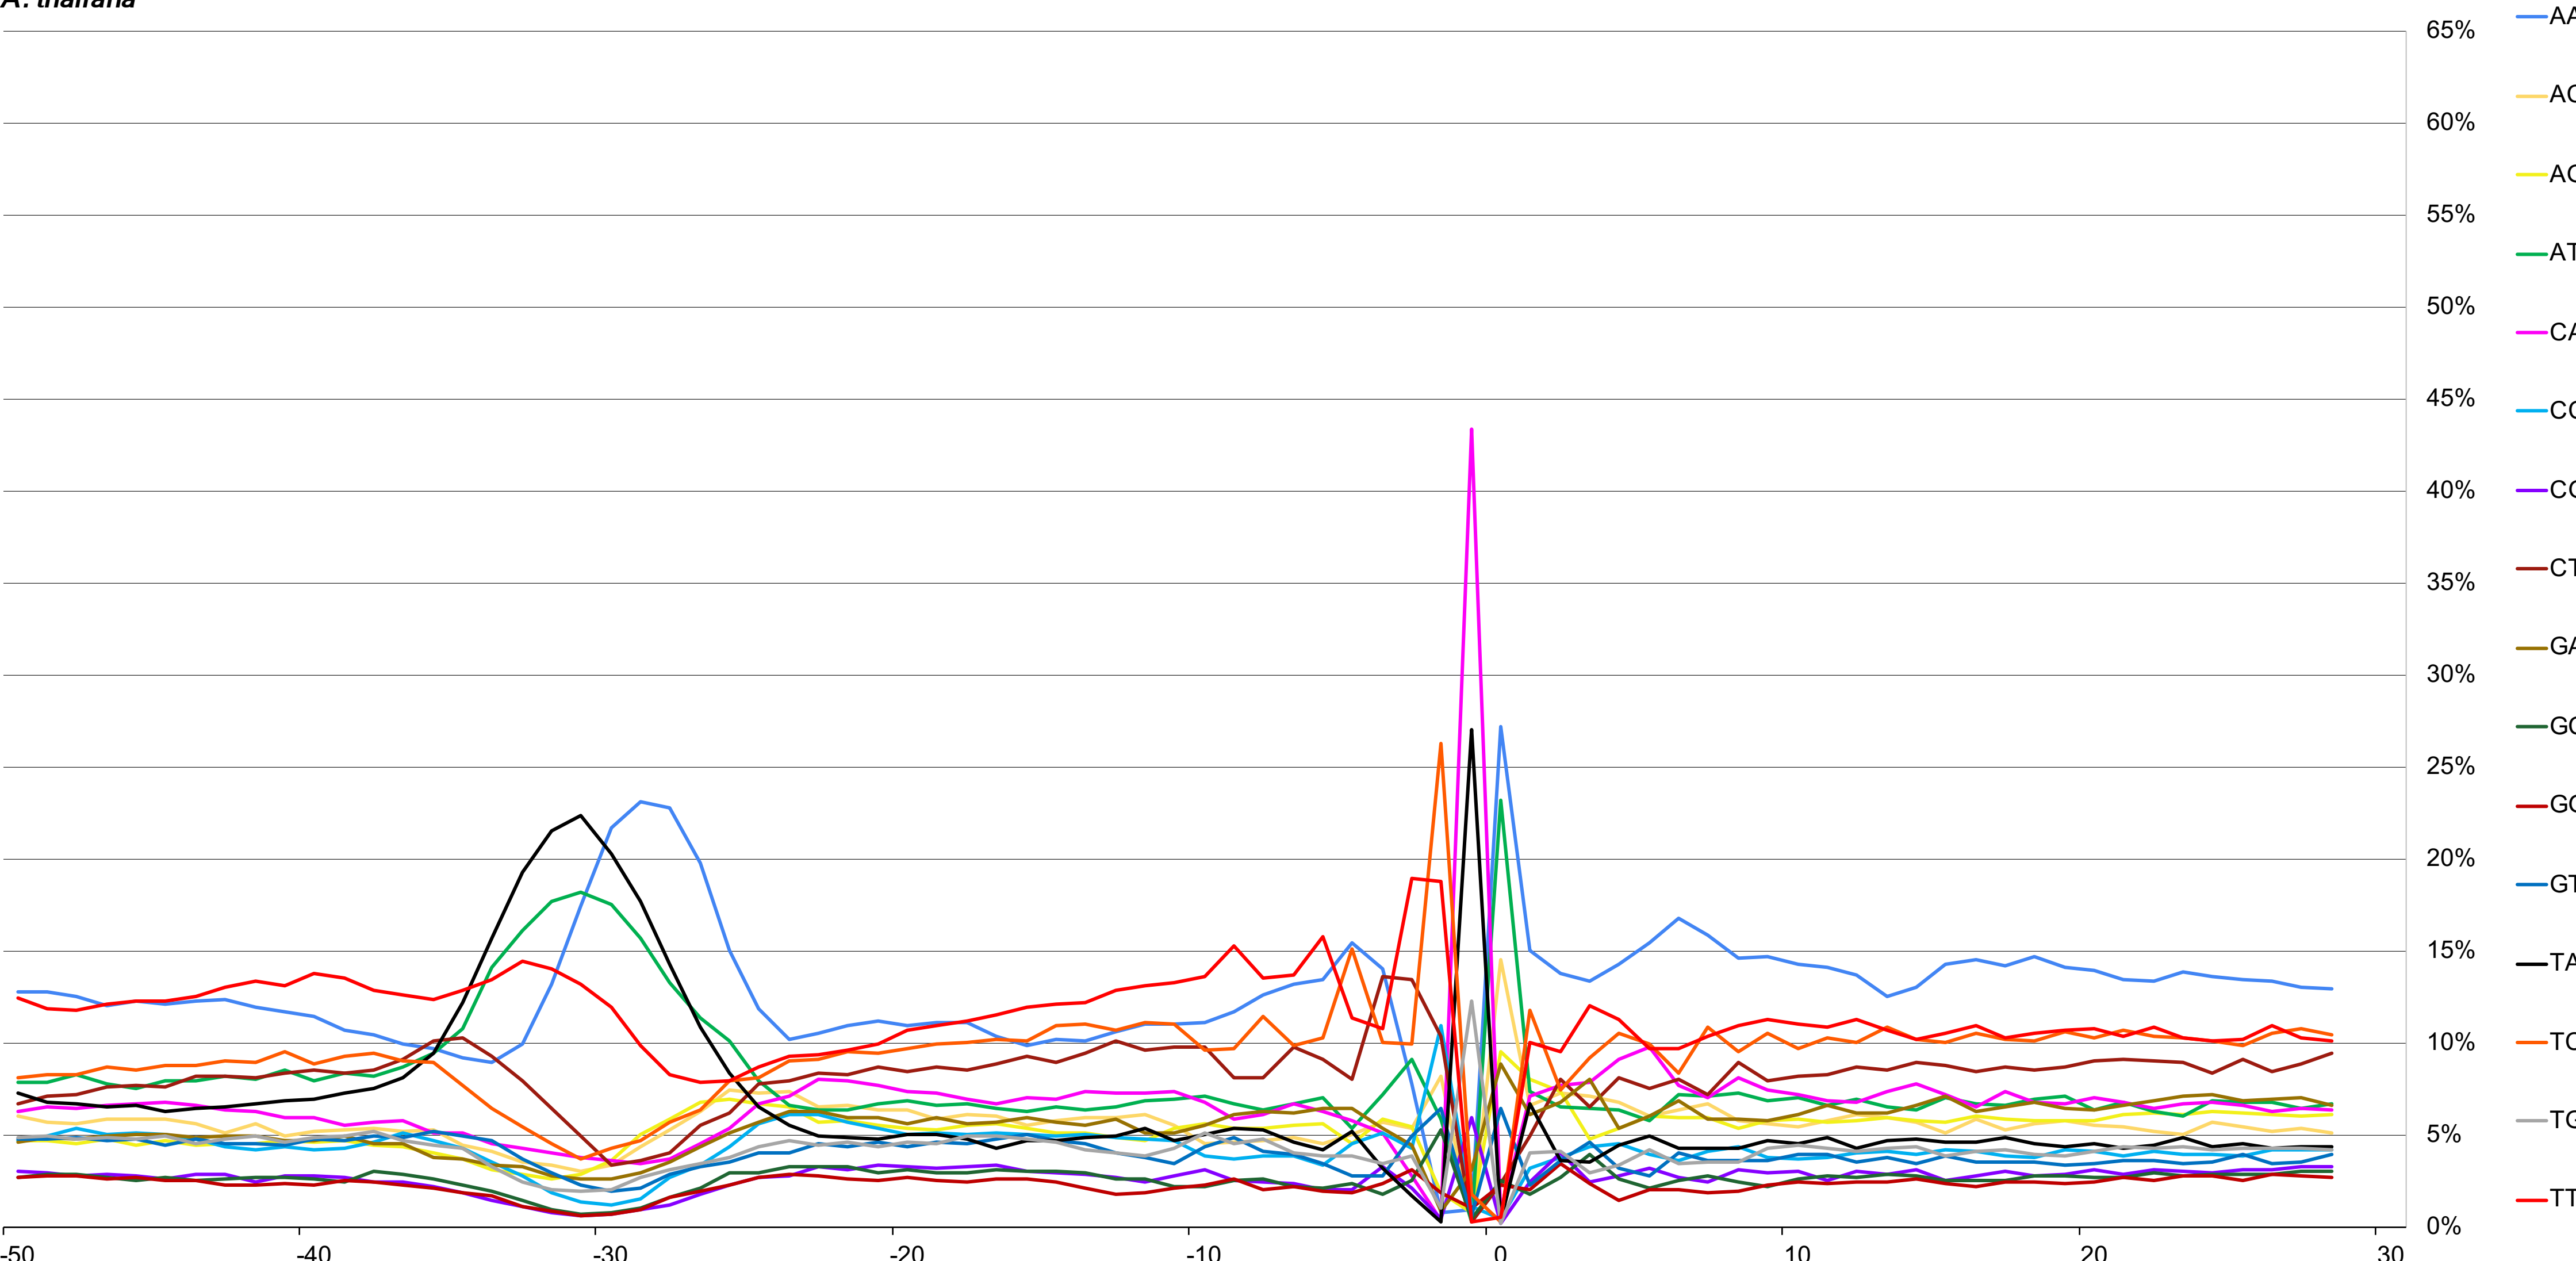

*Z. mays*

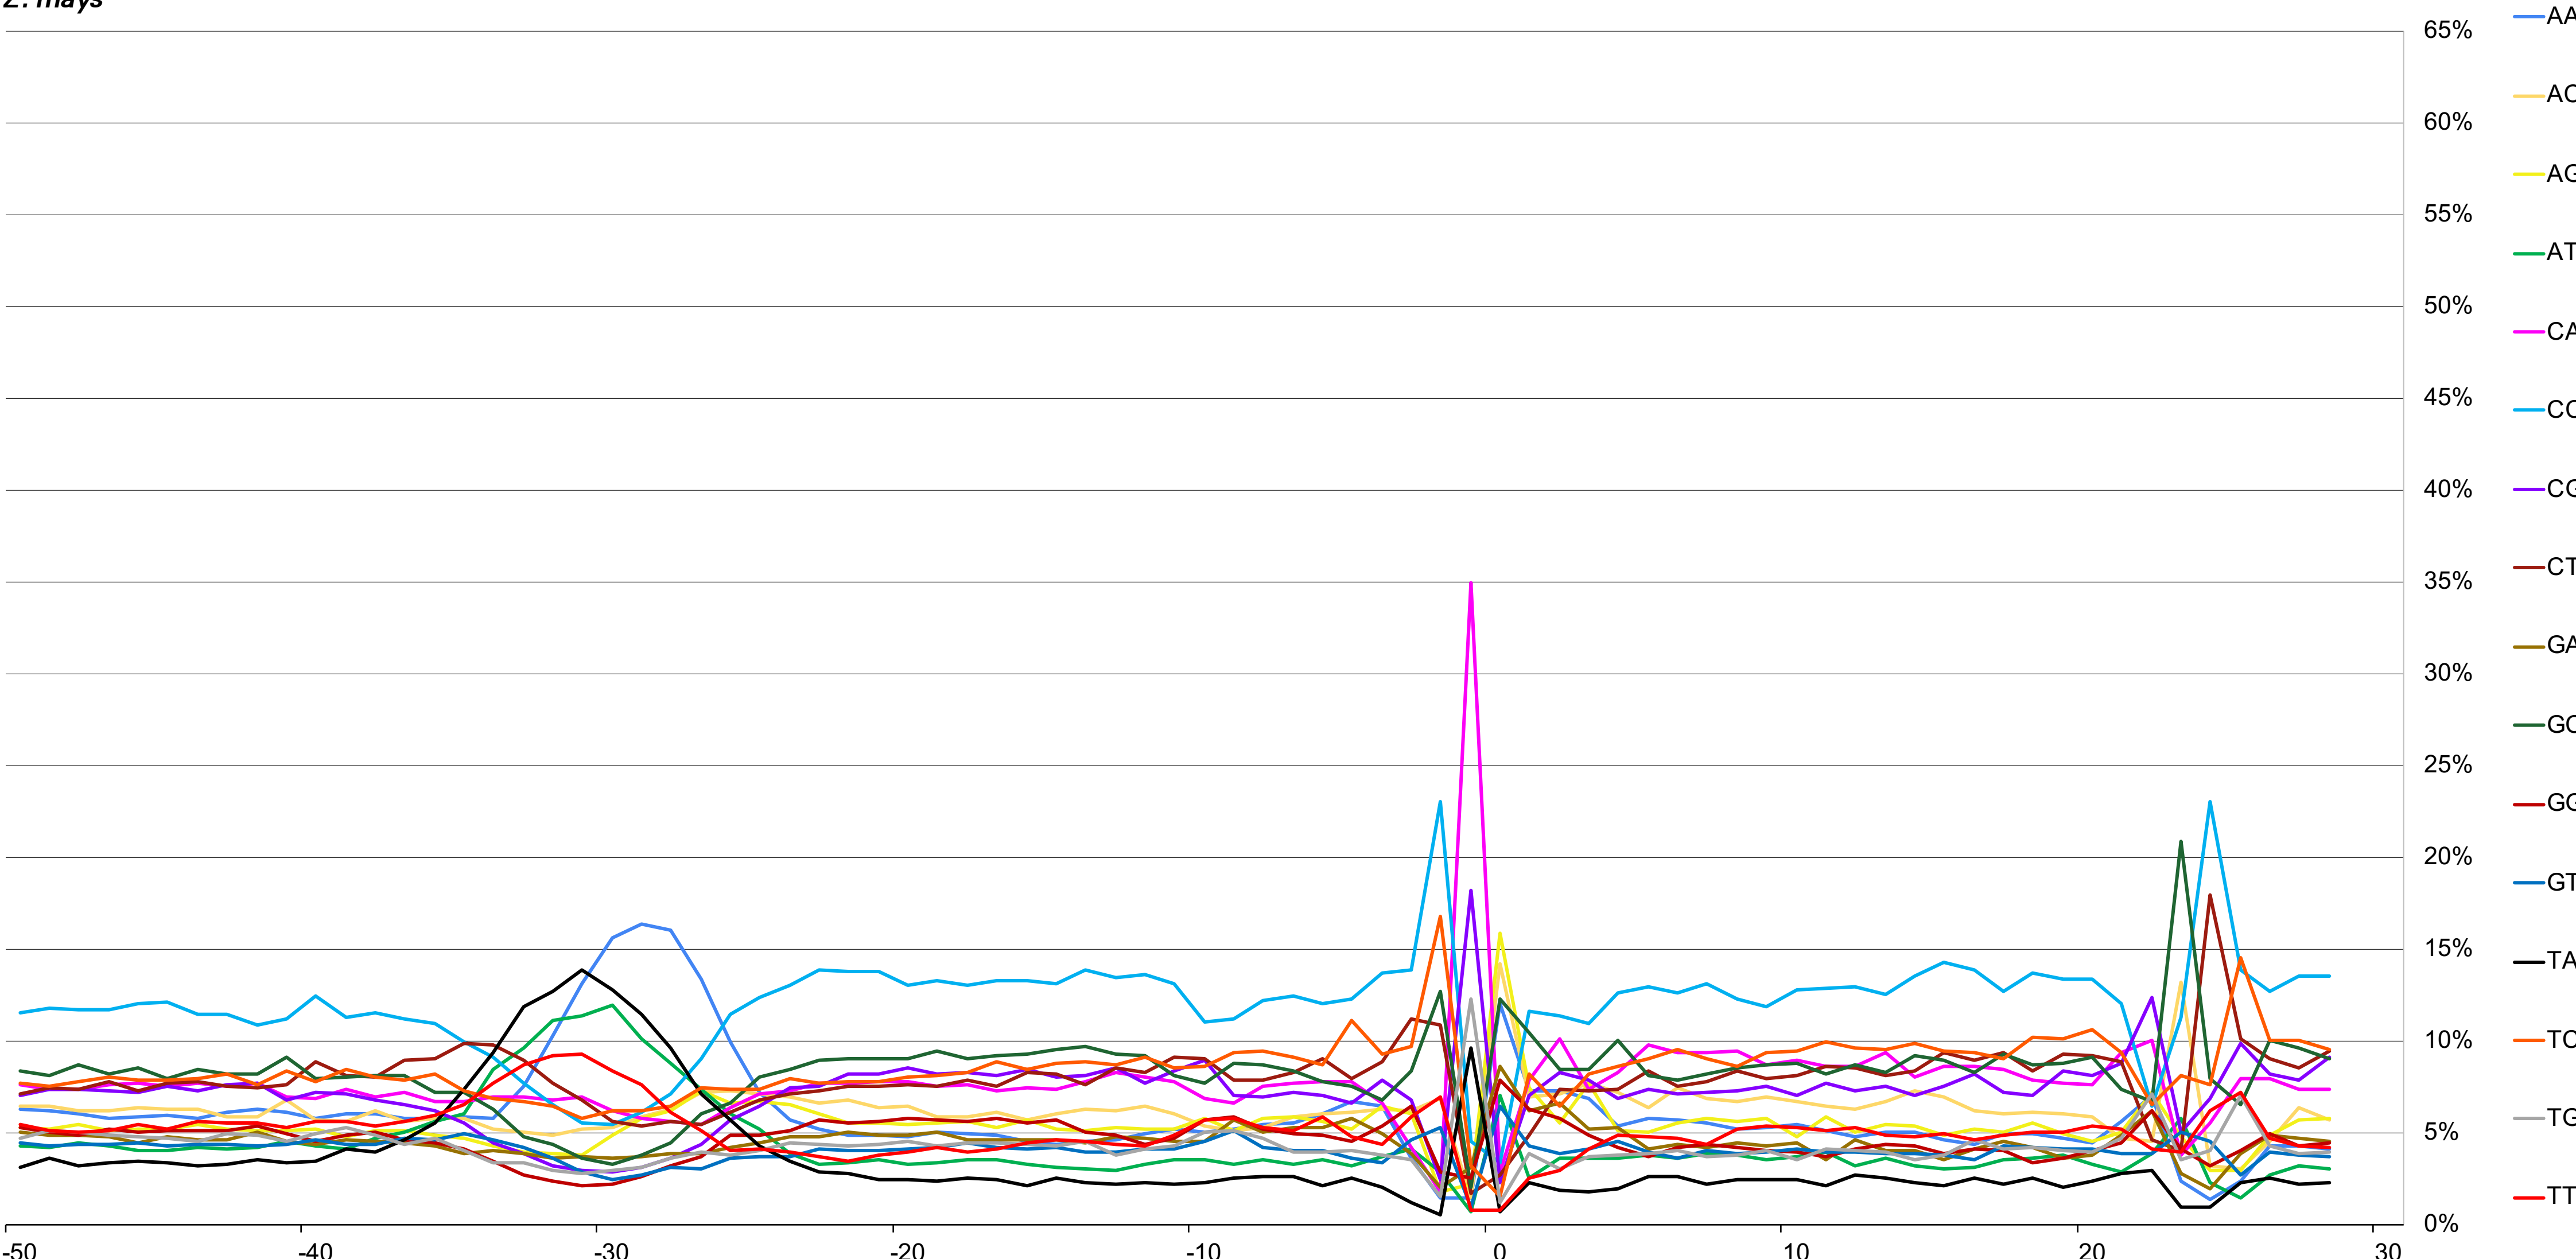

*S. cerevisiae*

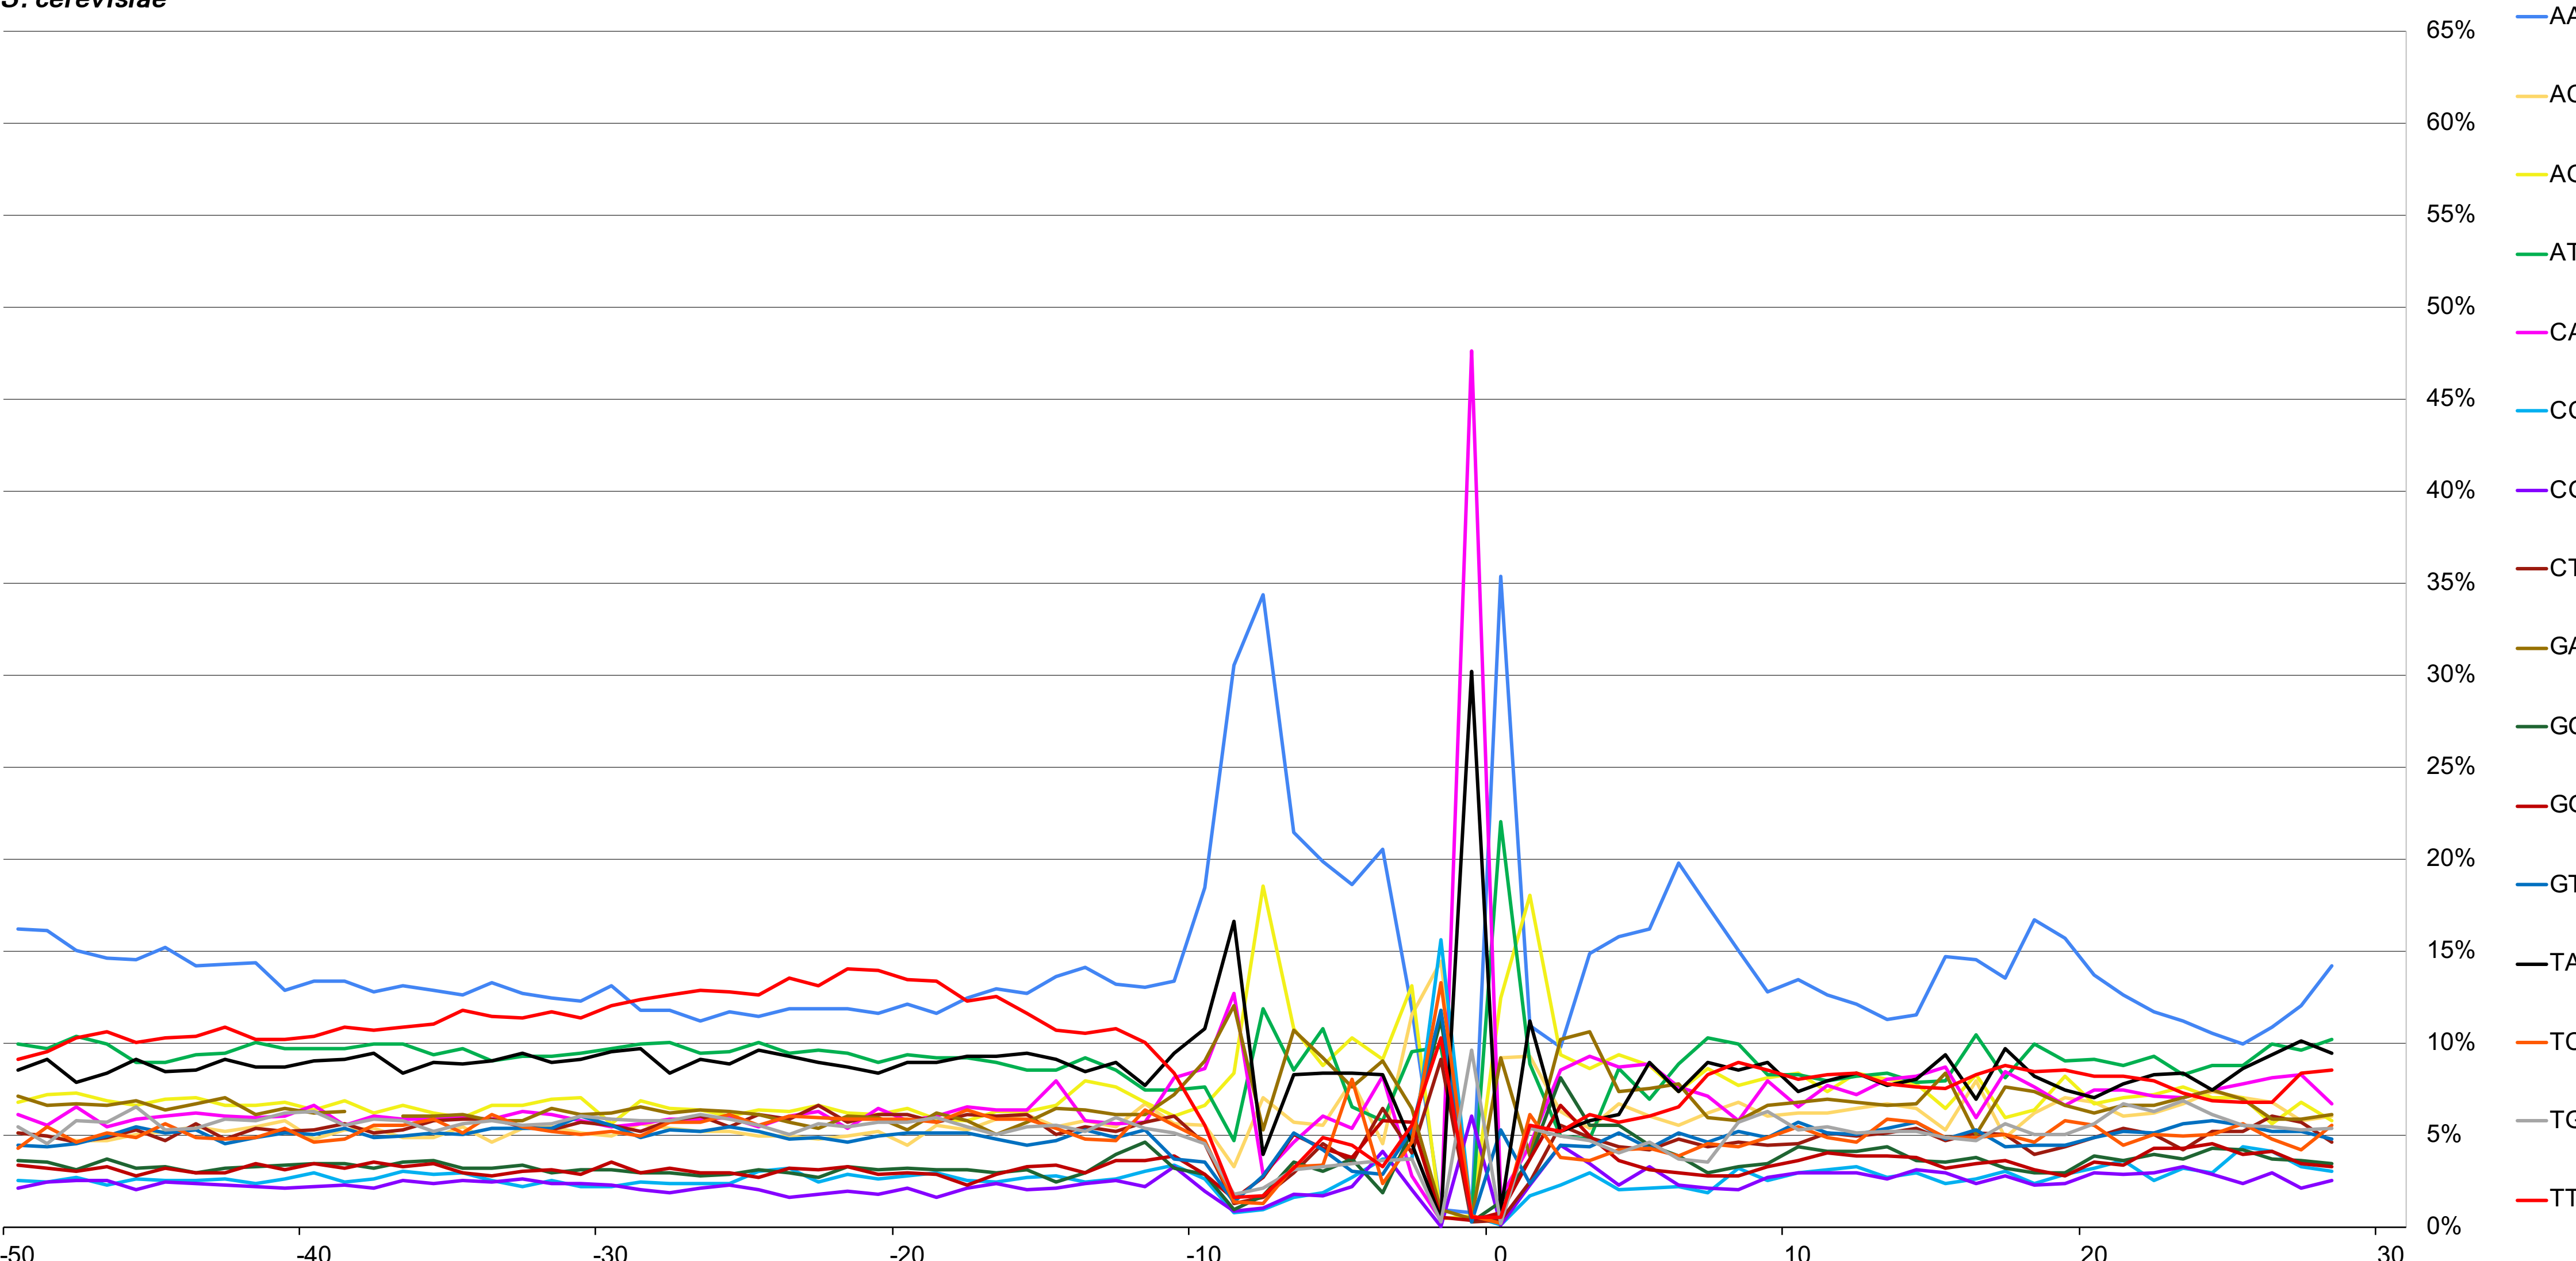



*S. pombe*

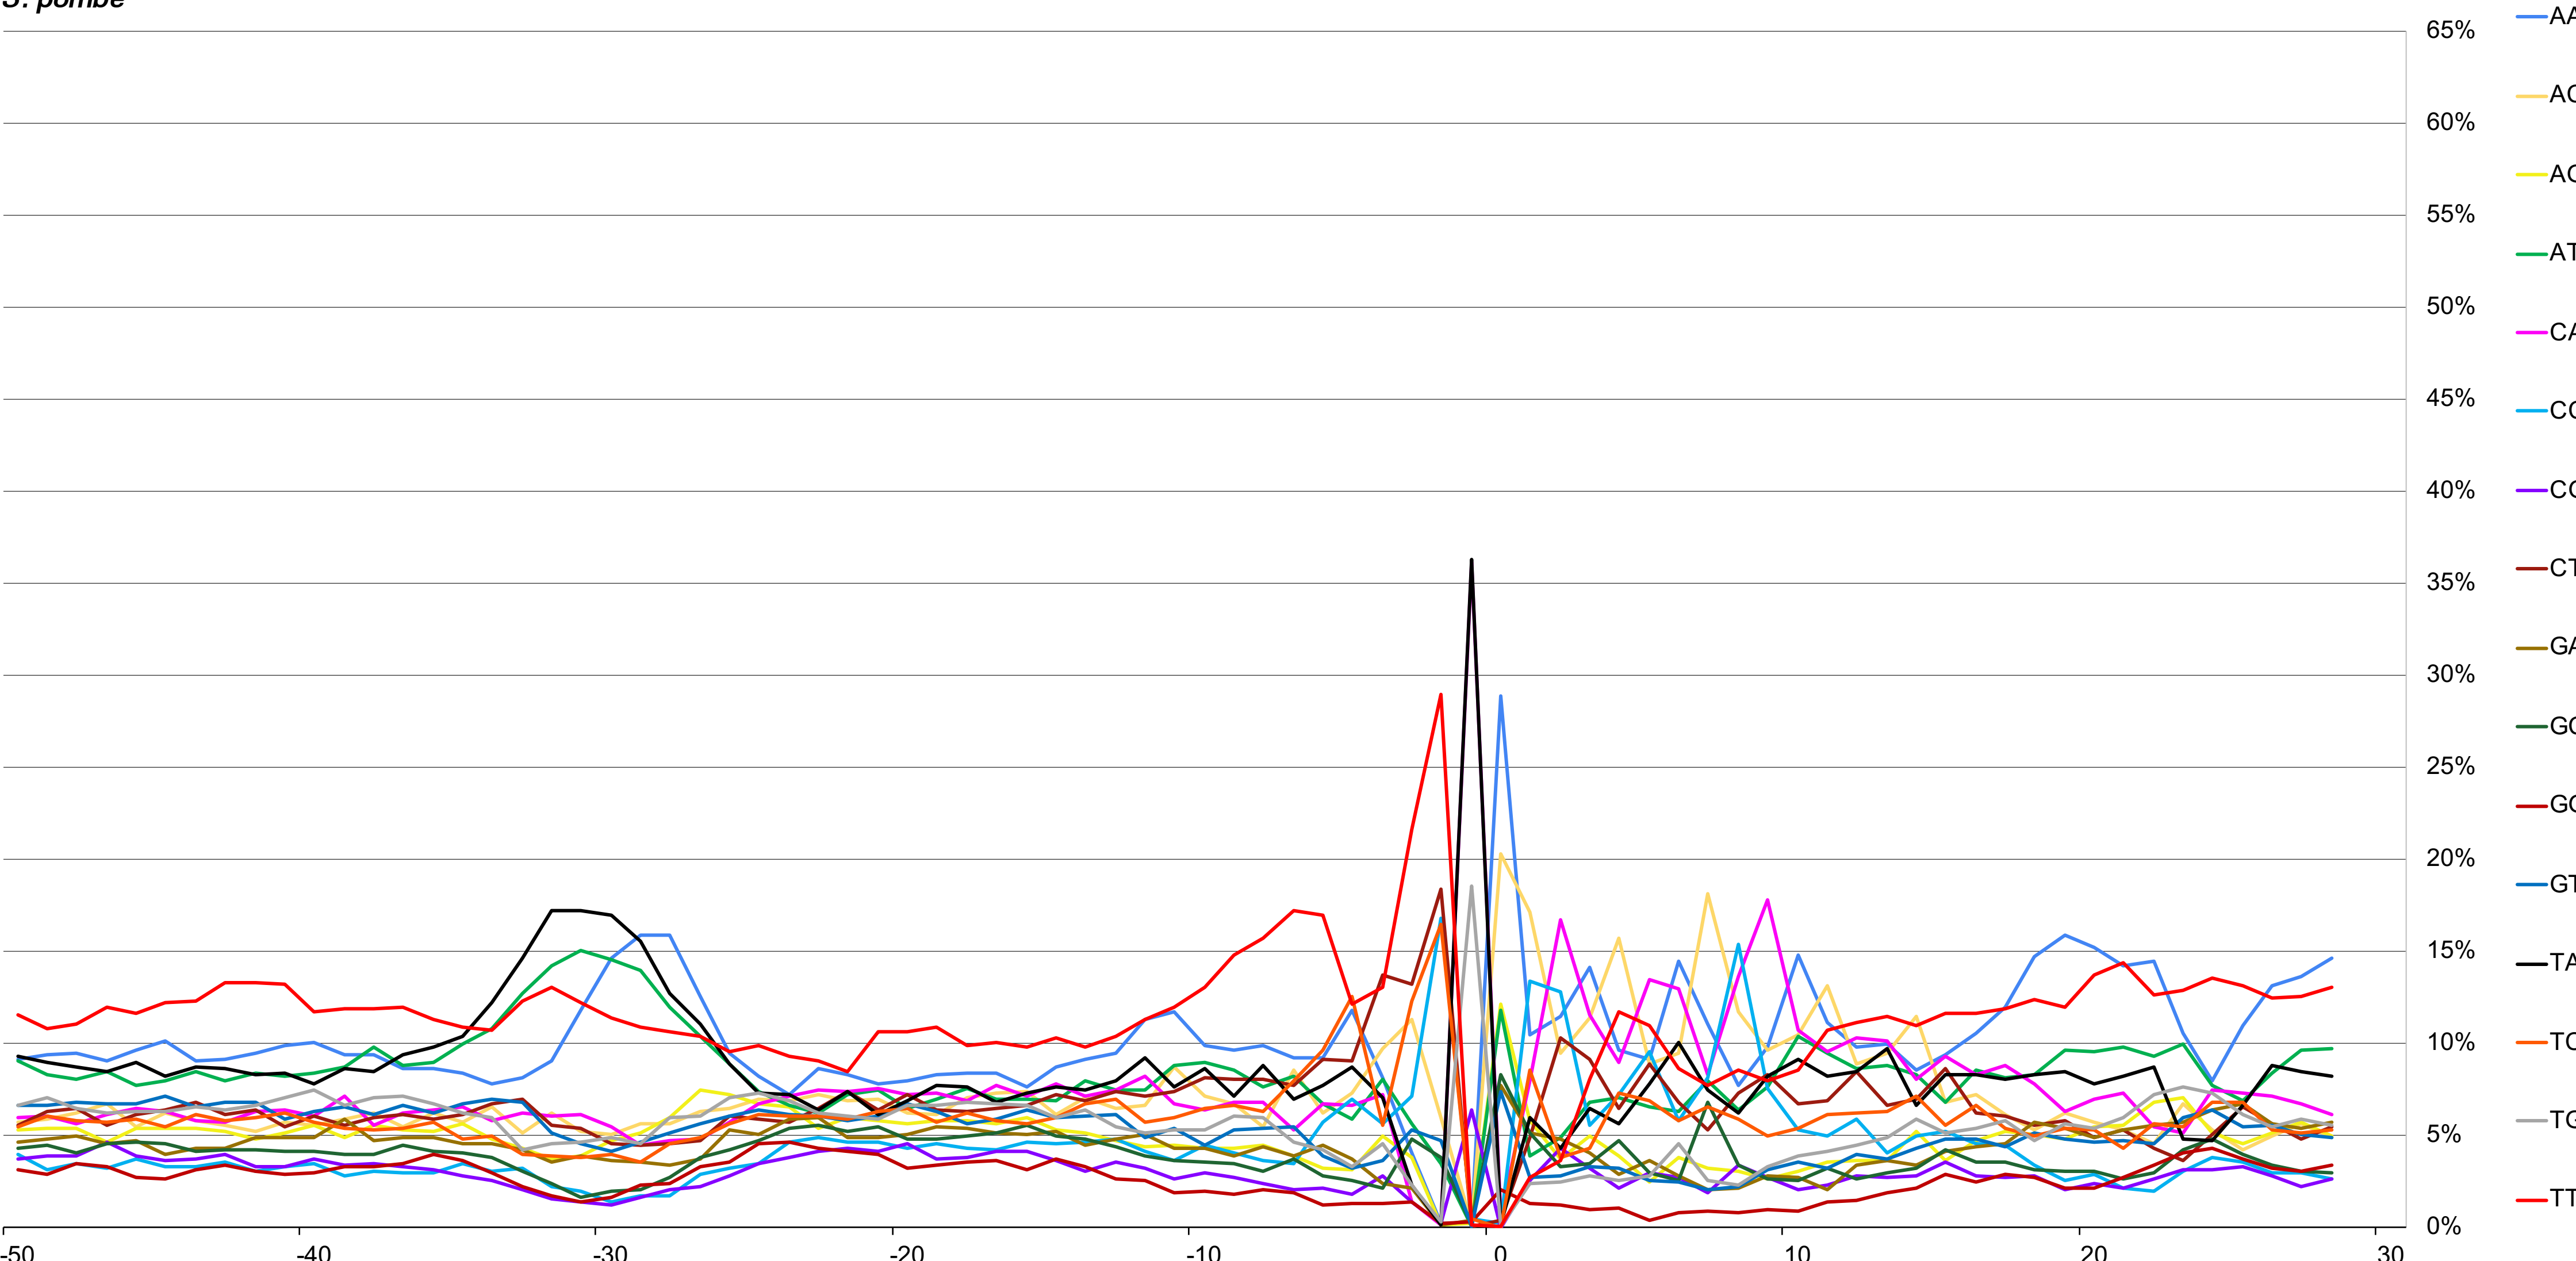

*P. falciparum*

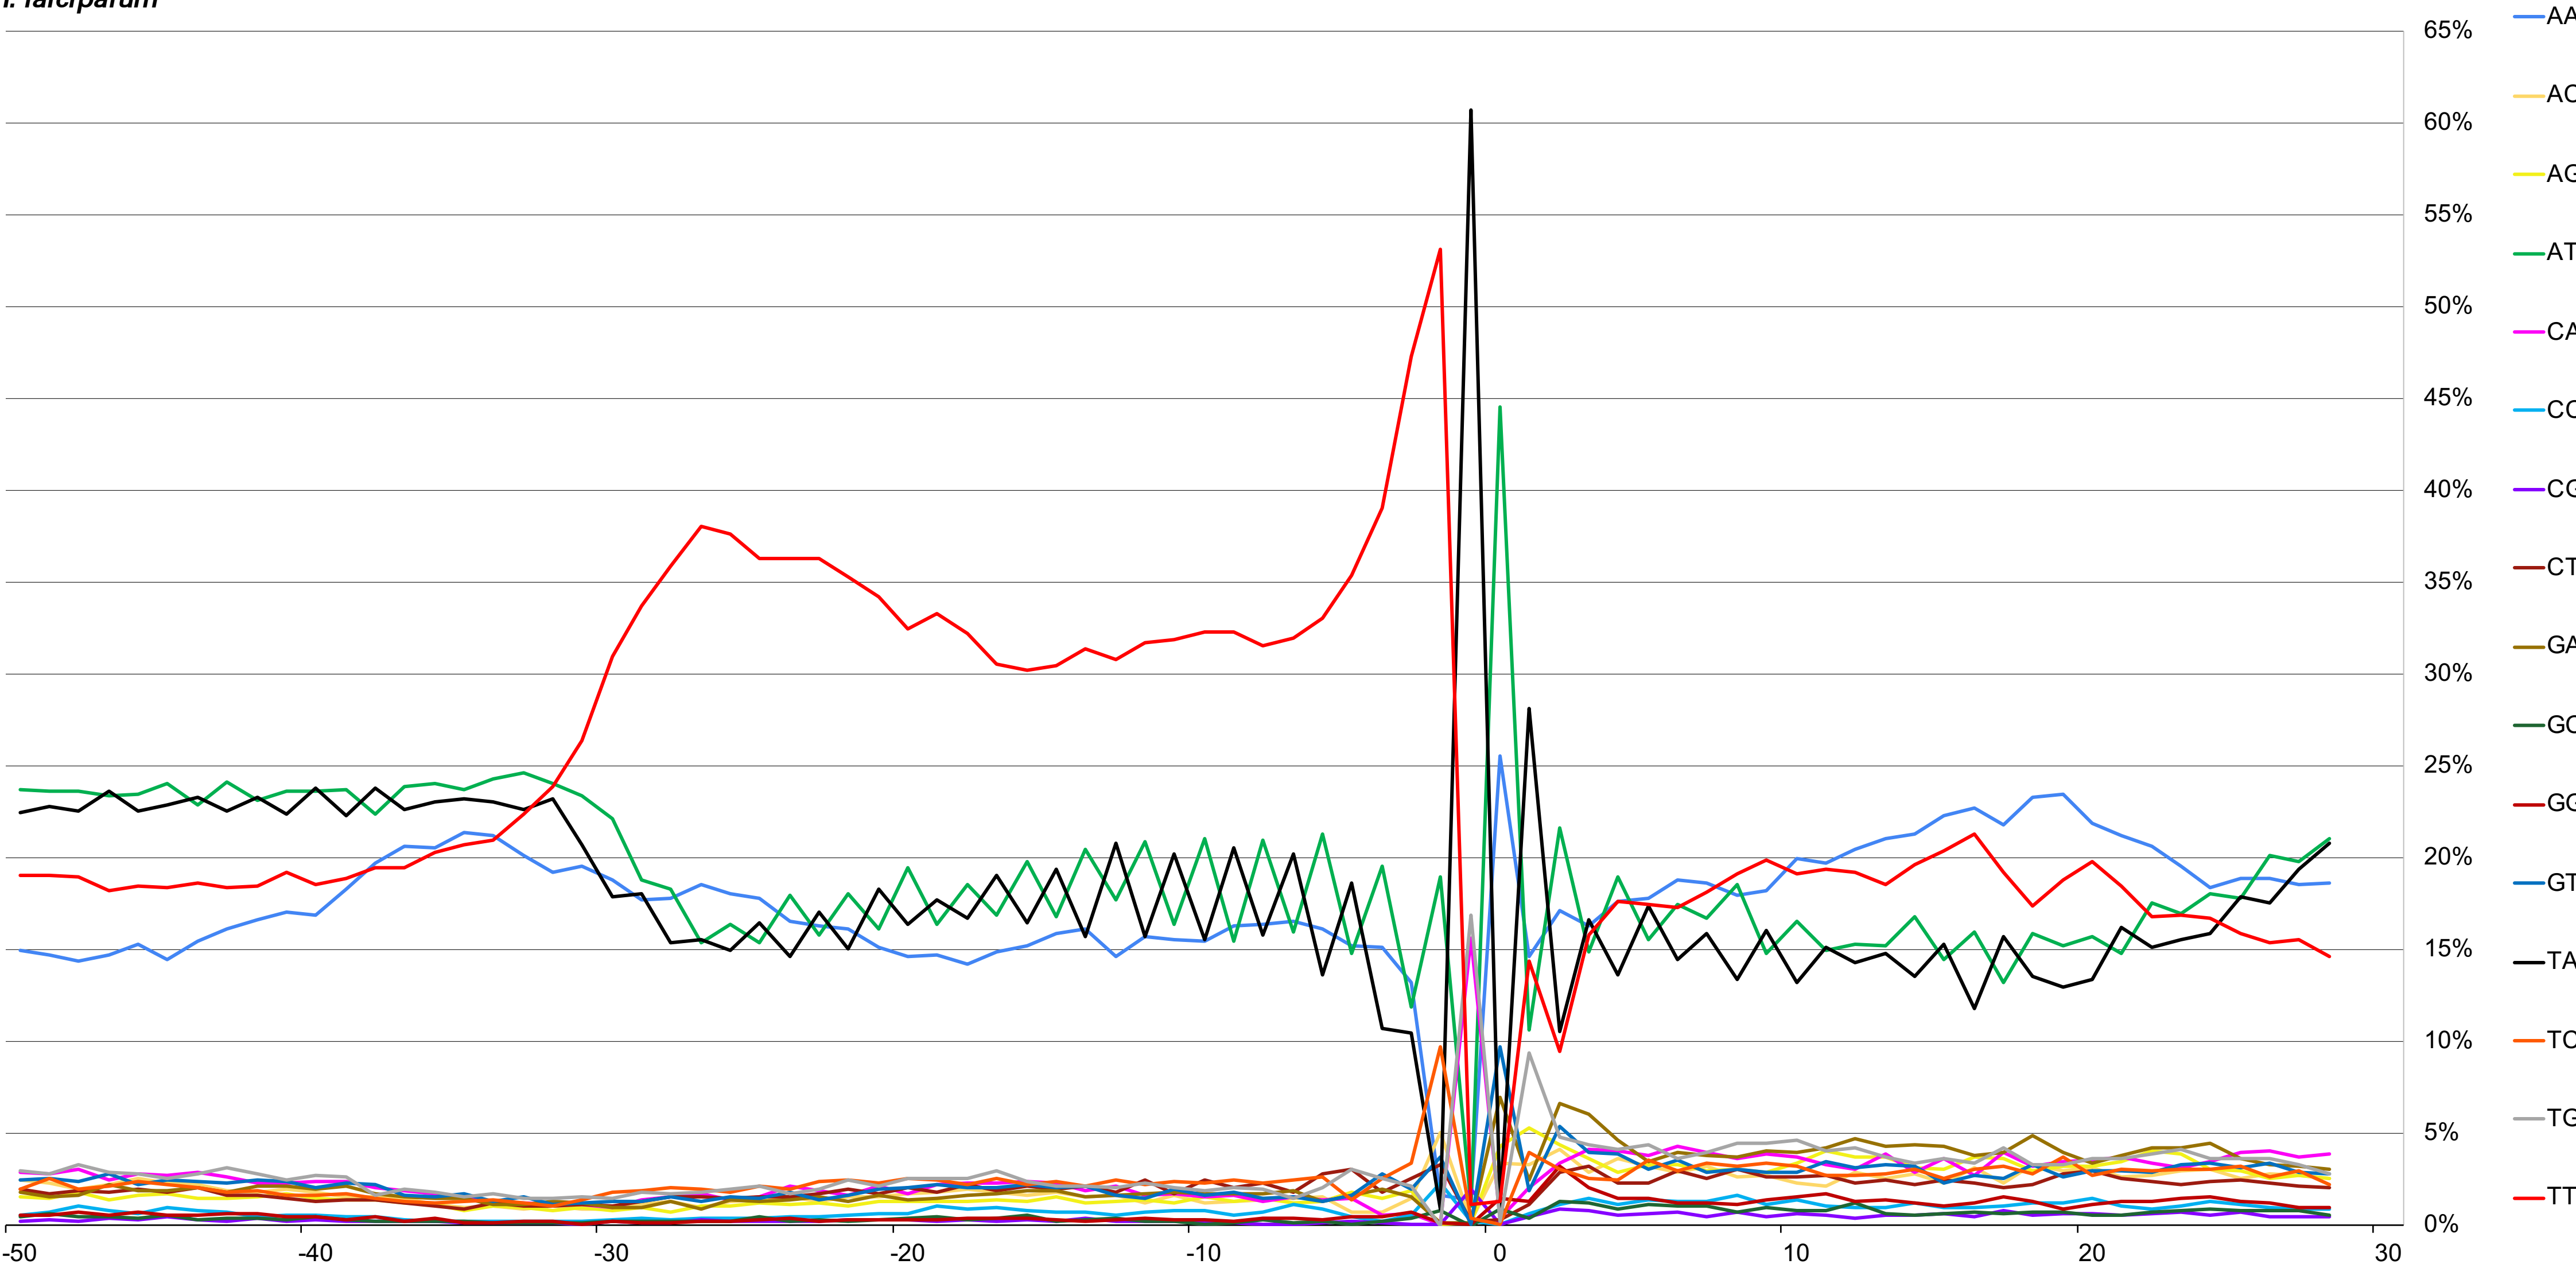

Supplement: s1 [file s1]
