# Supplementary figures and images for: Evolutionary Invariant of the Structure of DNA Double Helix in RNAP II Core Promoters
Source: MDPI journal article supplement (doi:10.3390/ijms231810873), 2022-09-17

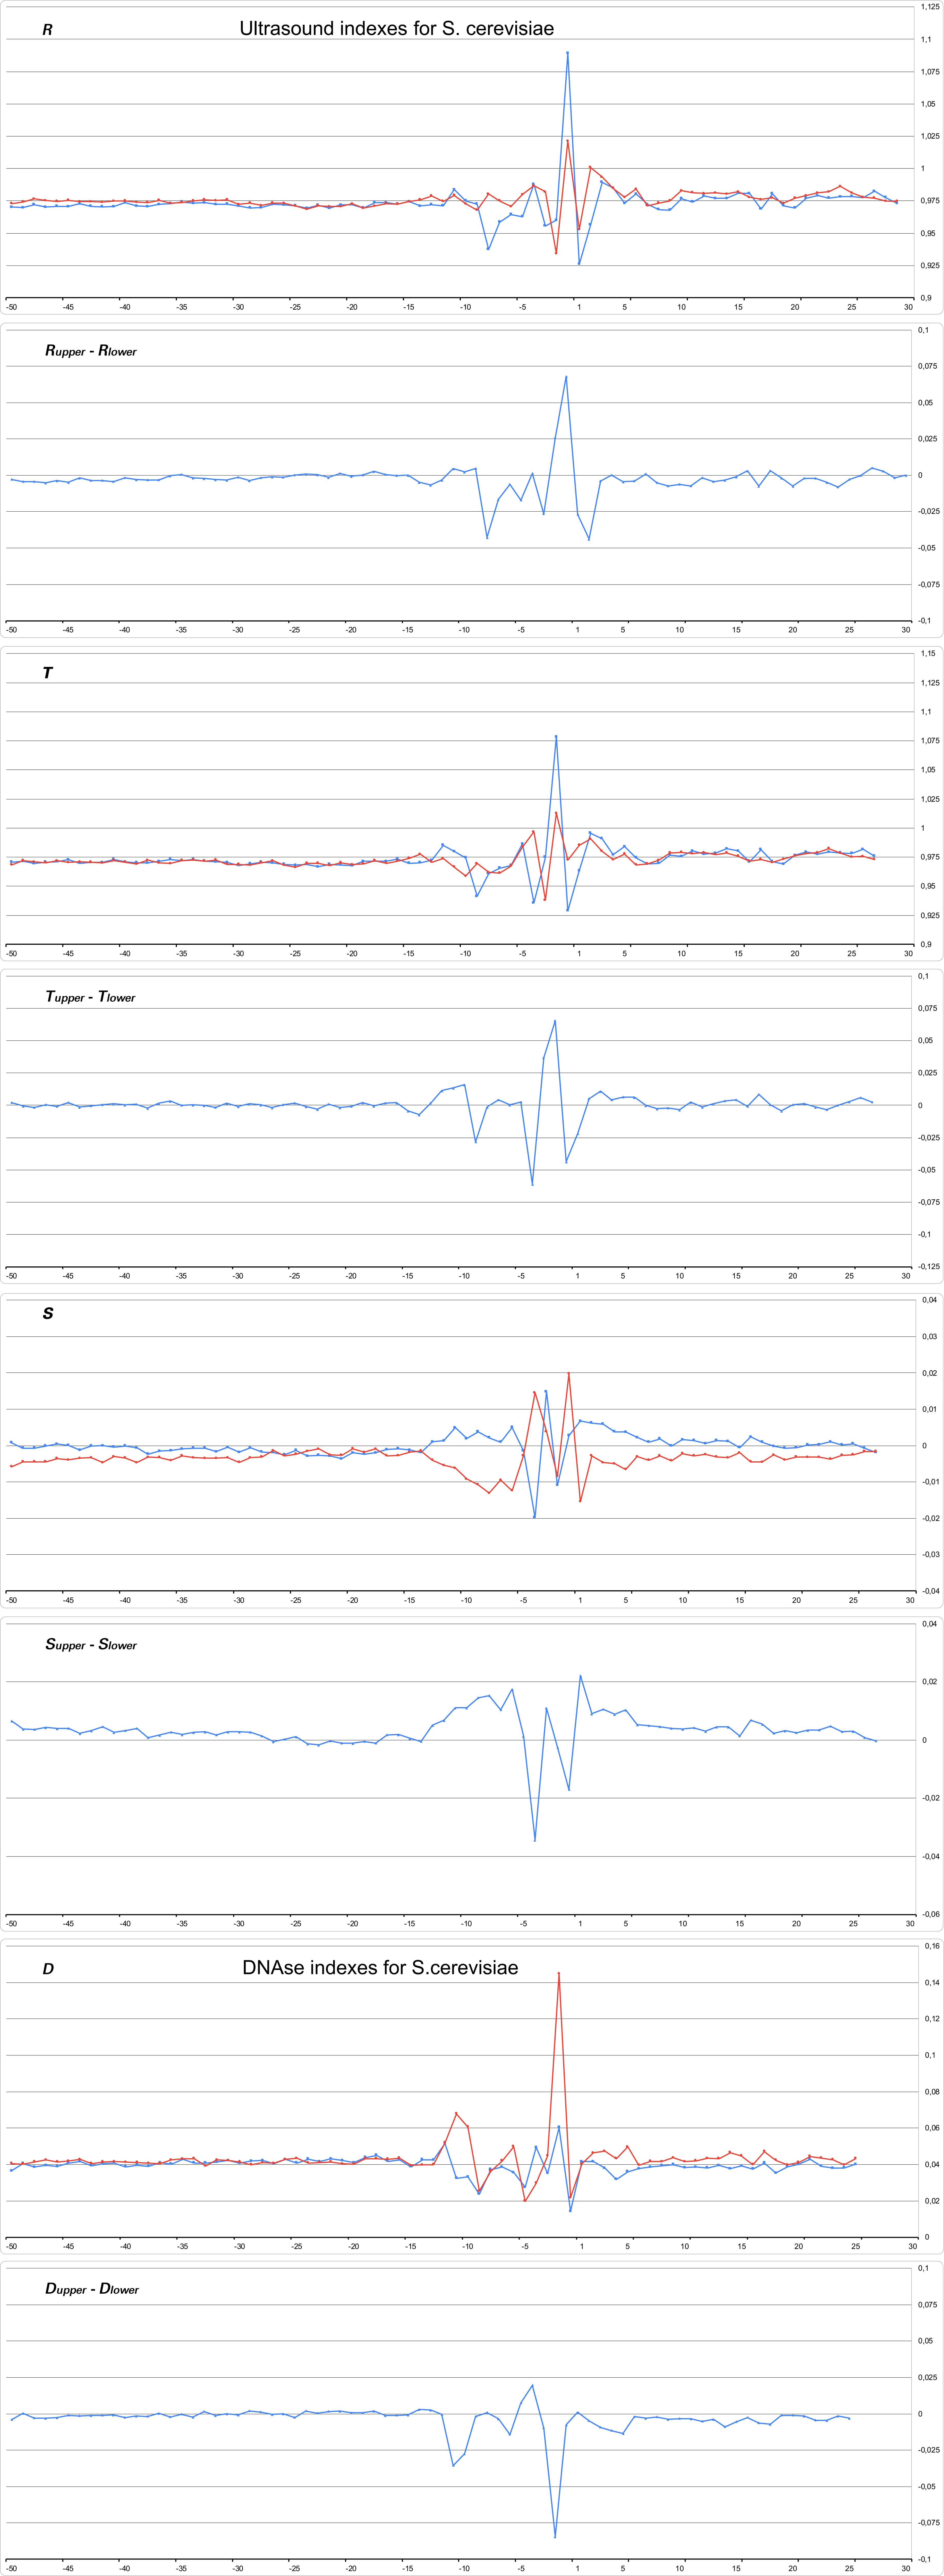

Supplement: s1 [file s1]

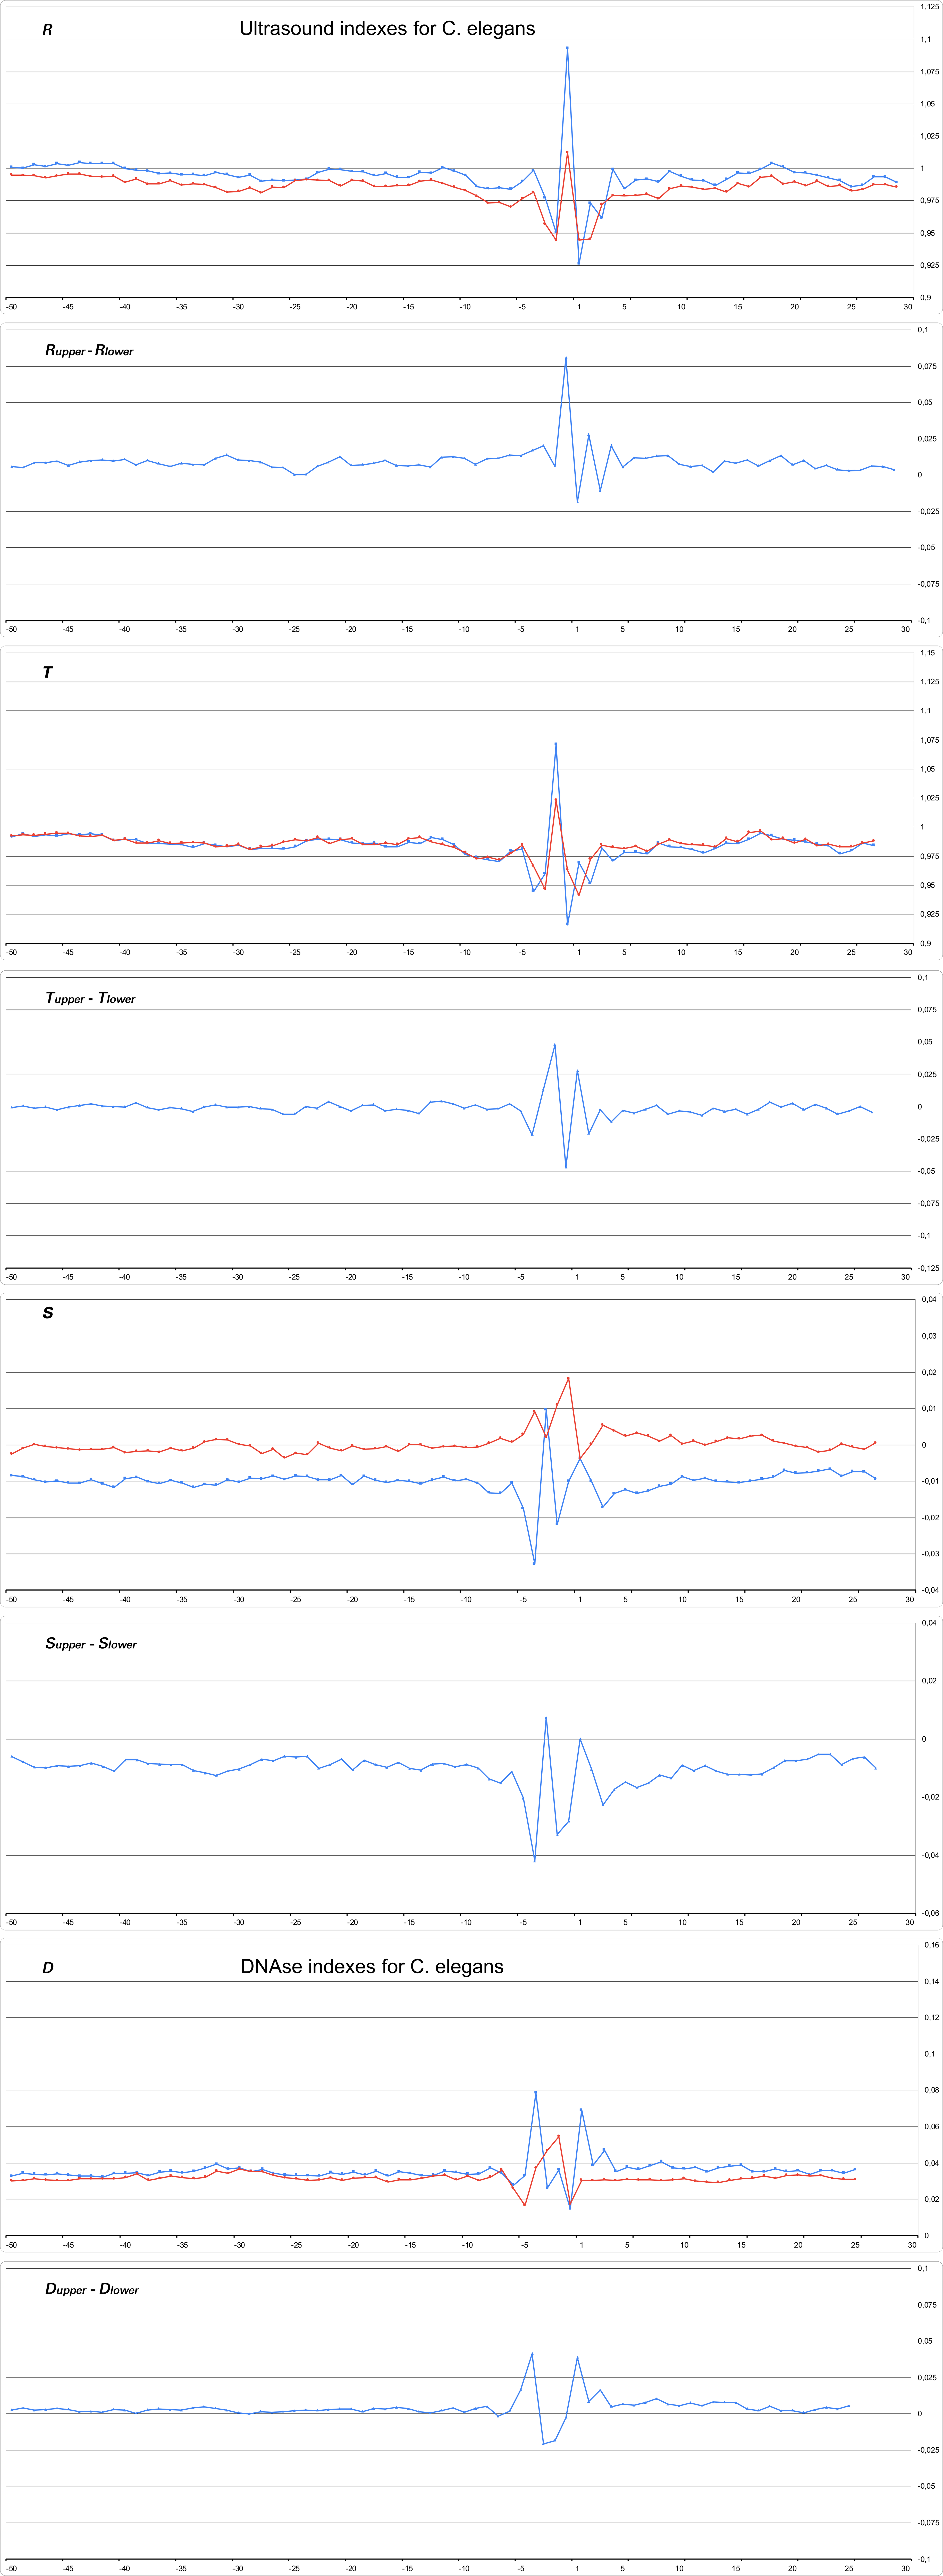

Supplement: s1 [file s1]

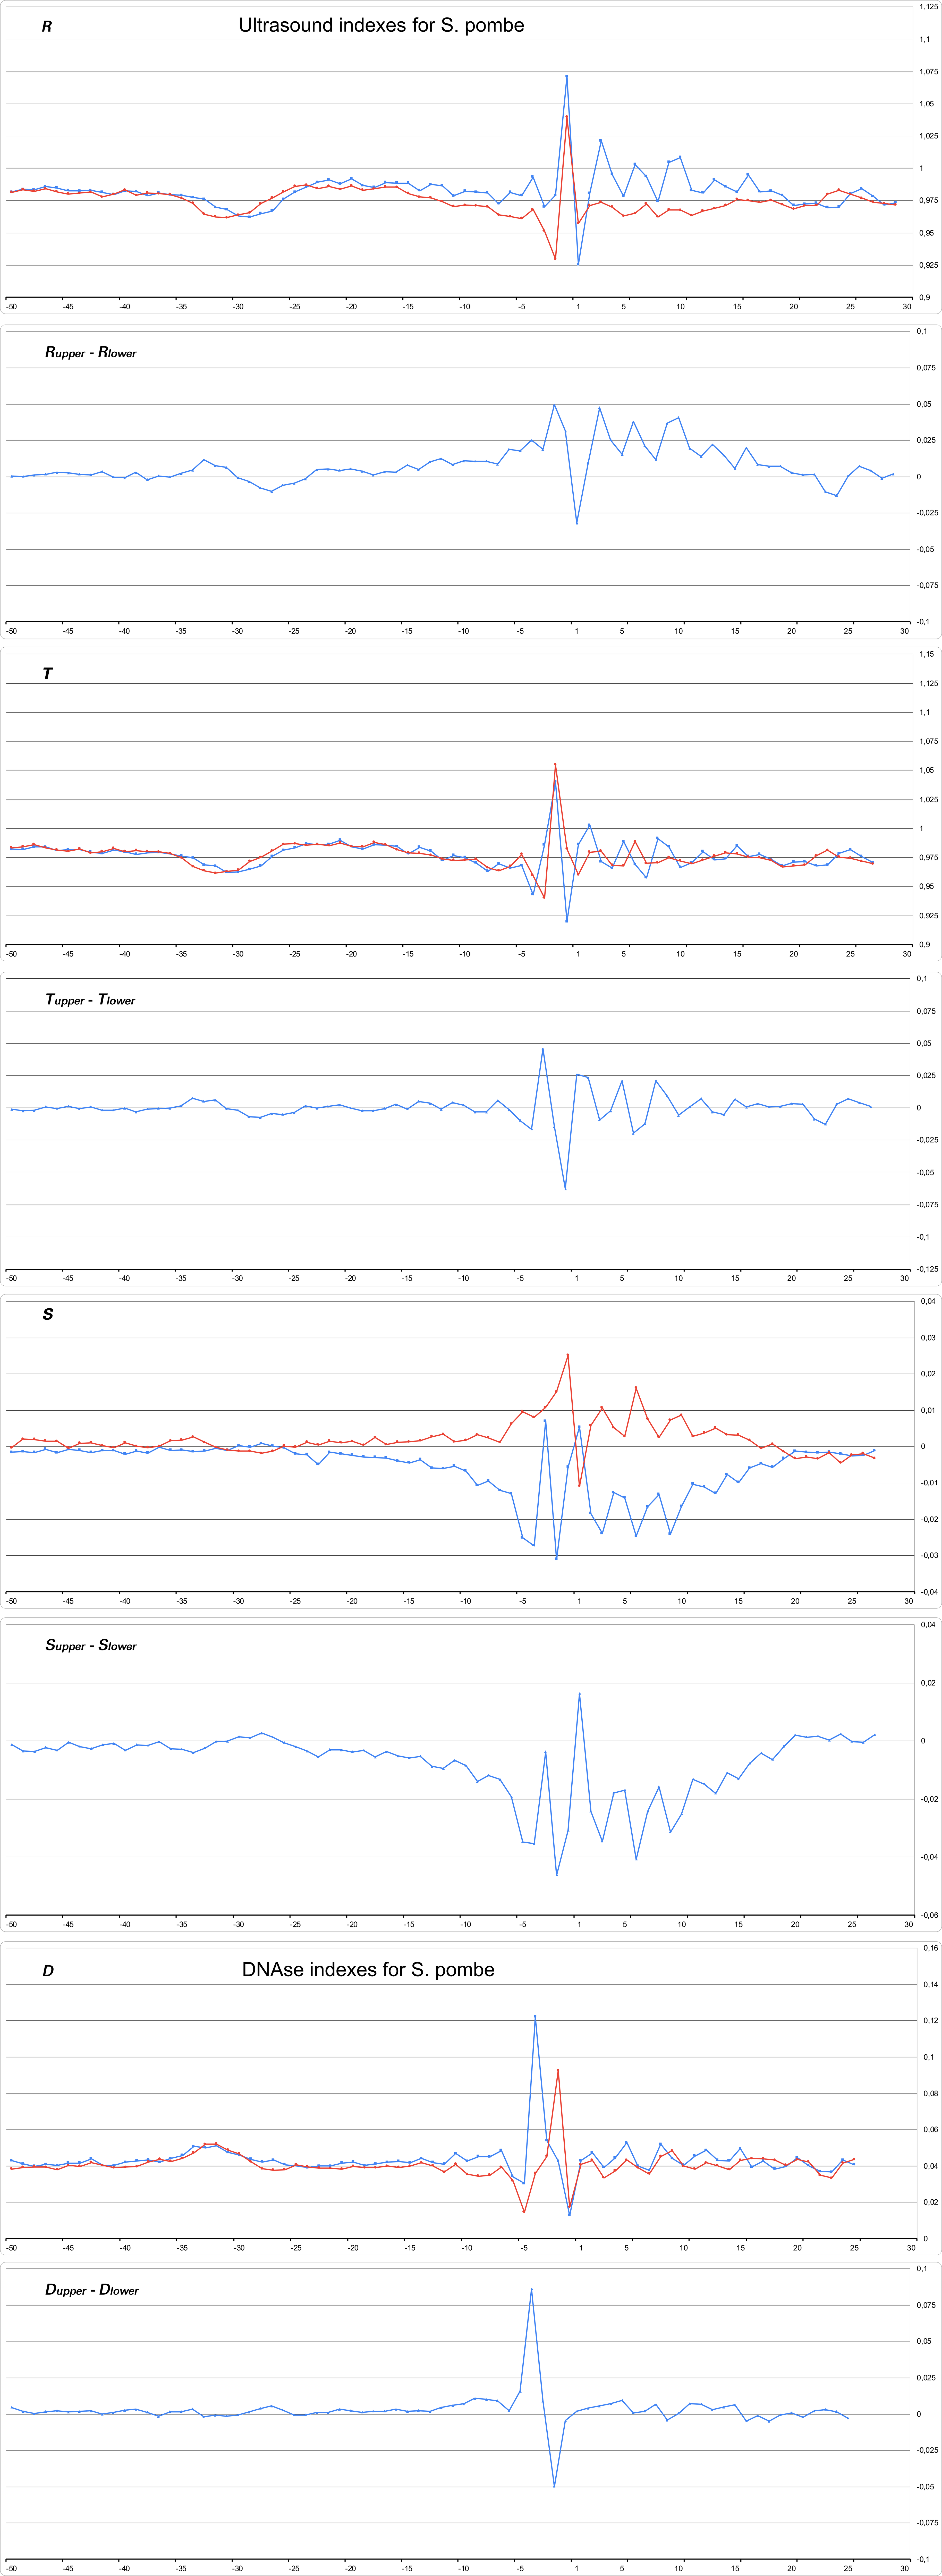

Supplement: s1 [file s1]

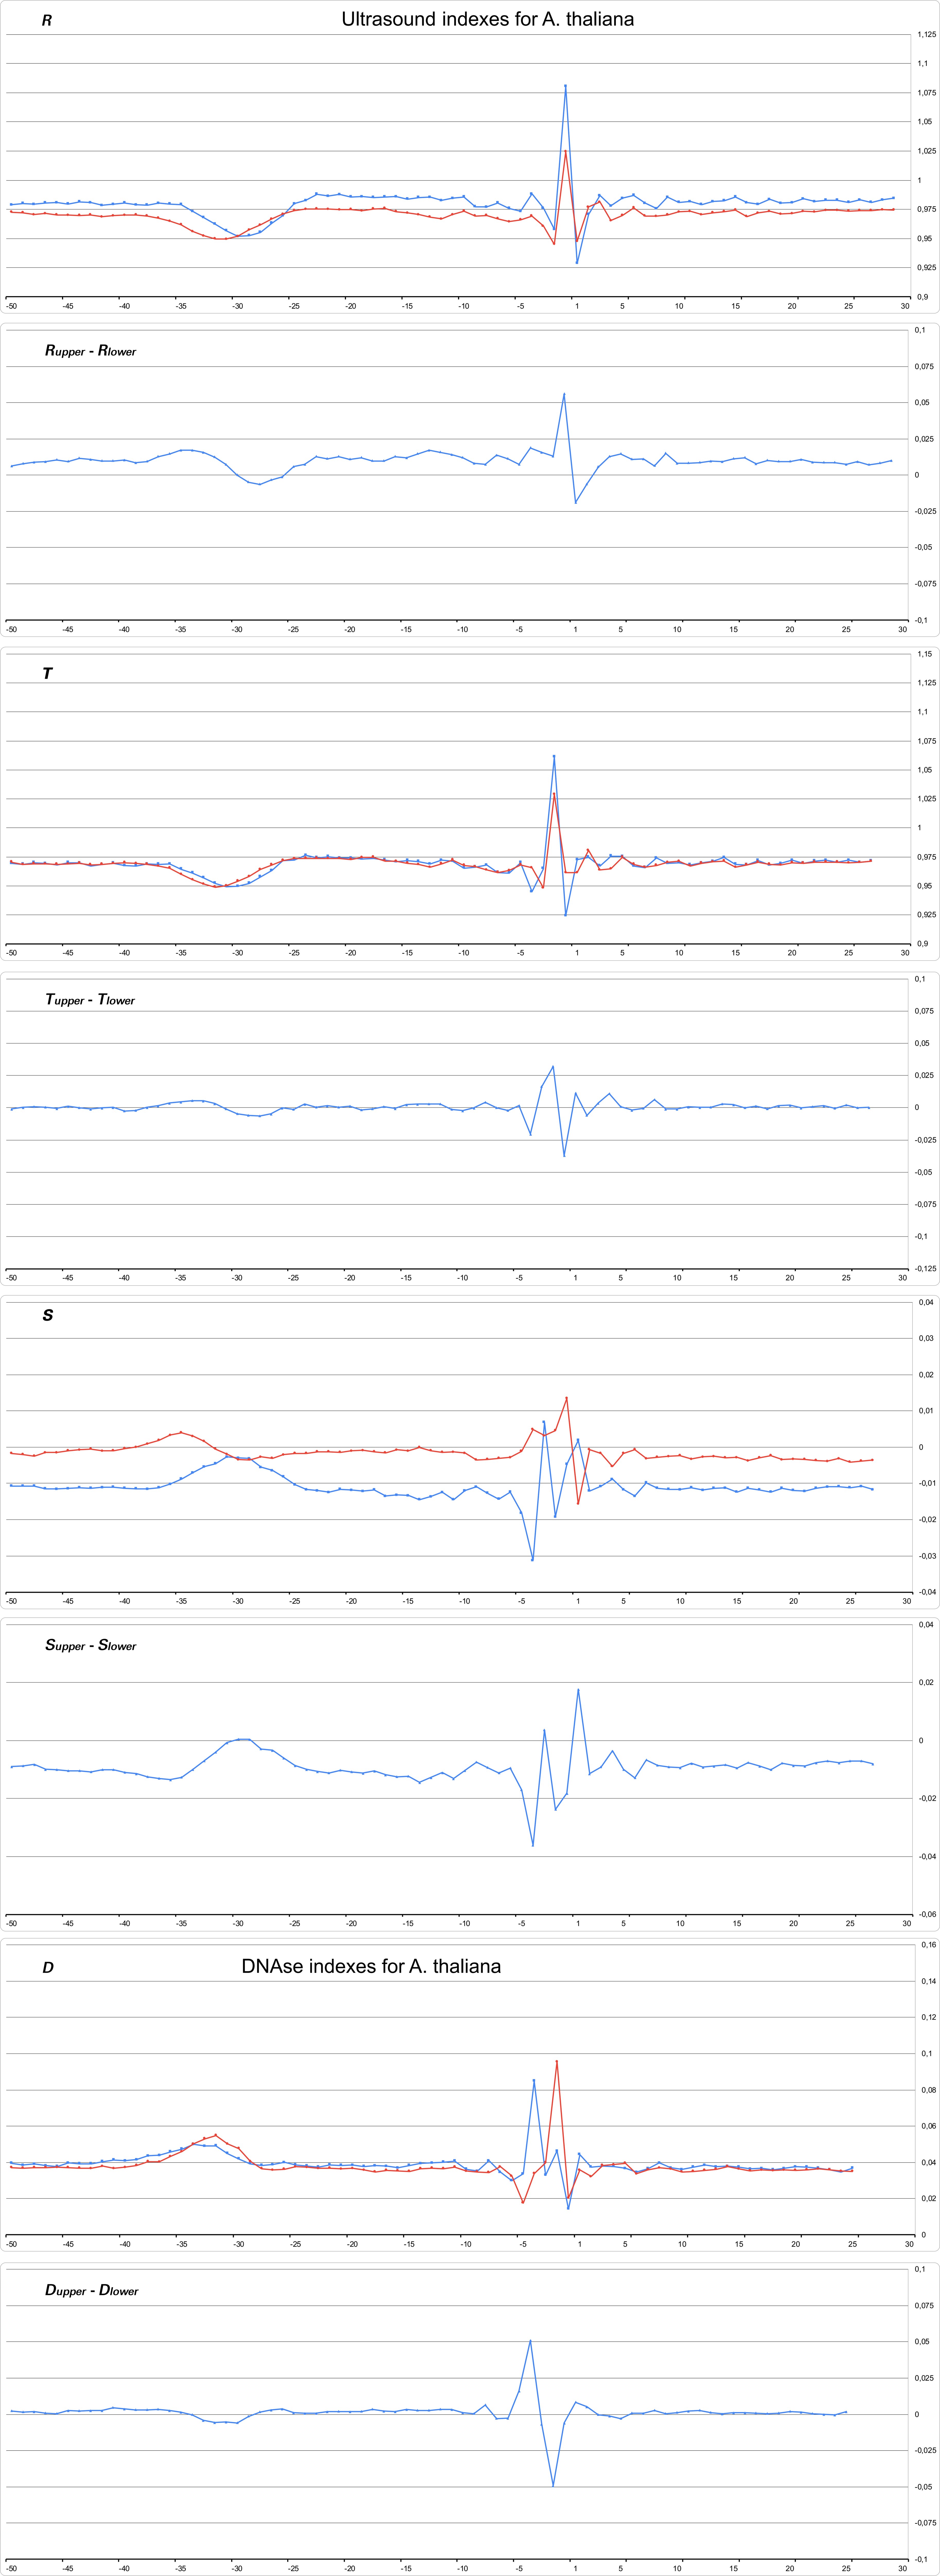

Supplement: s1 [file s1]

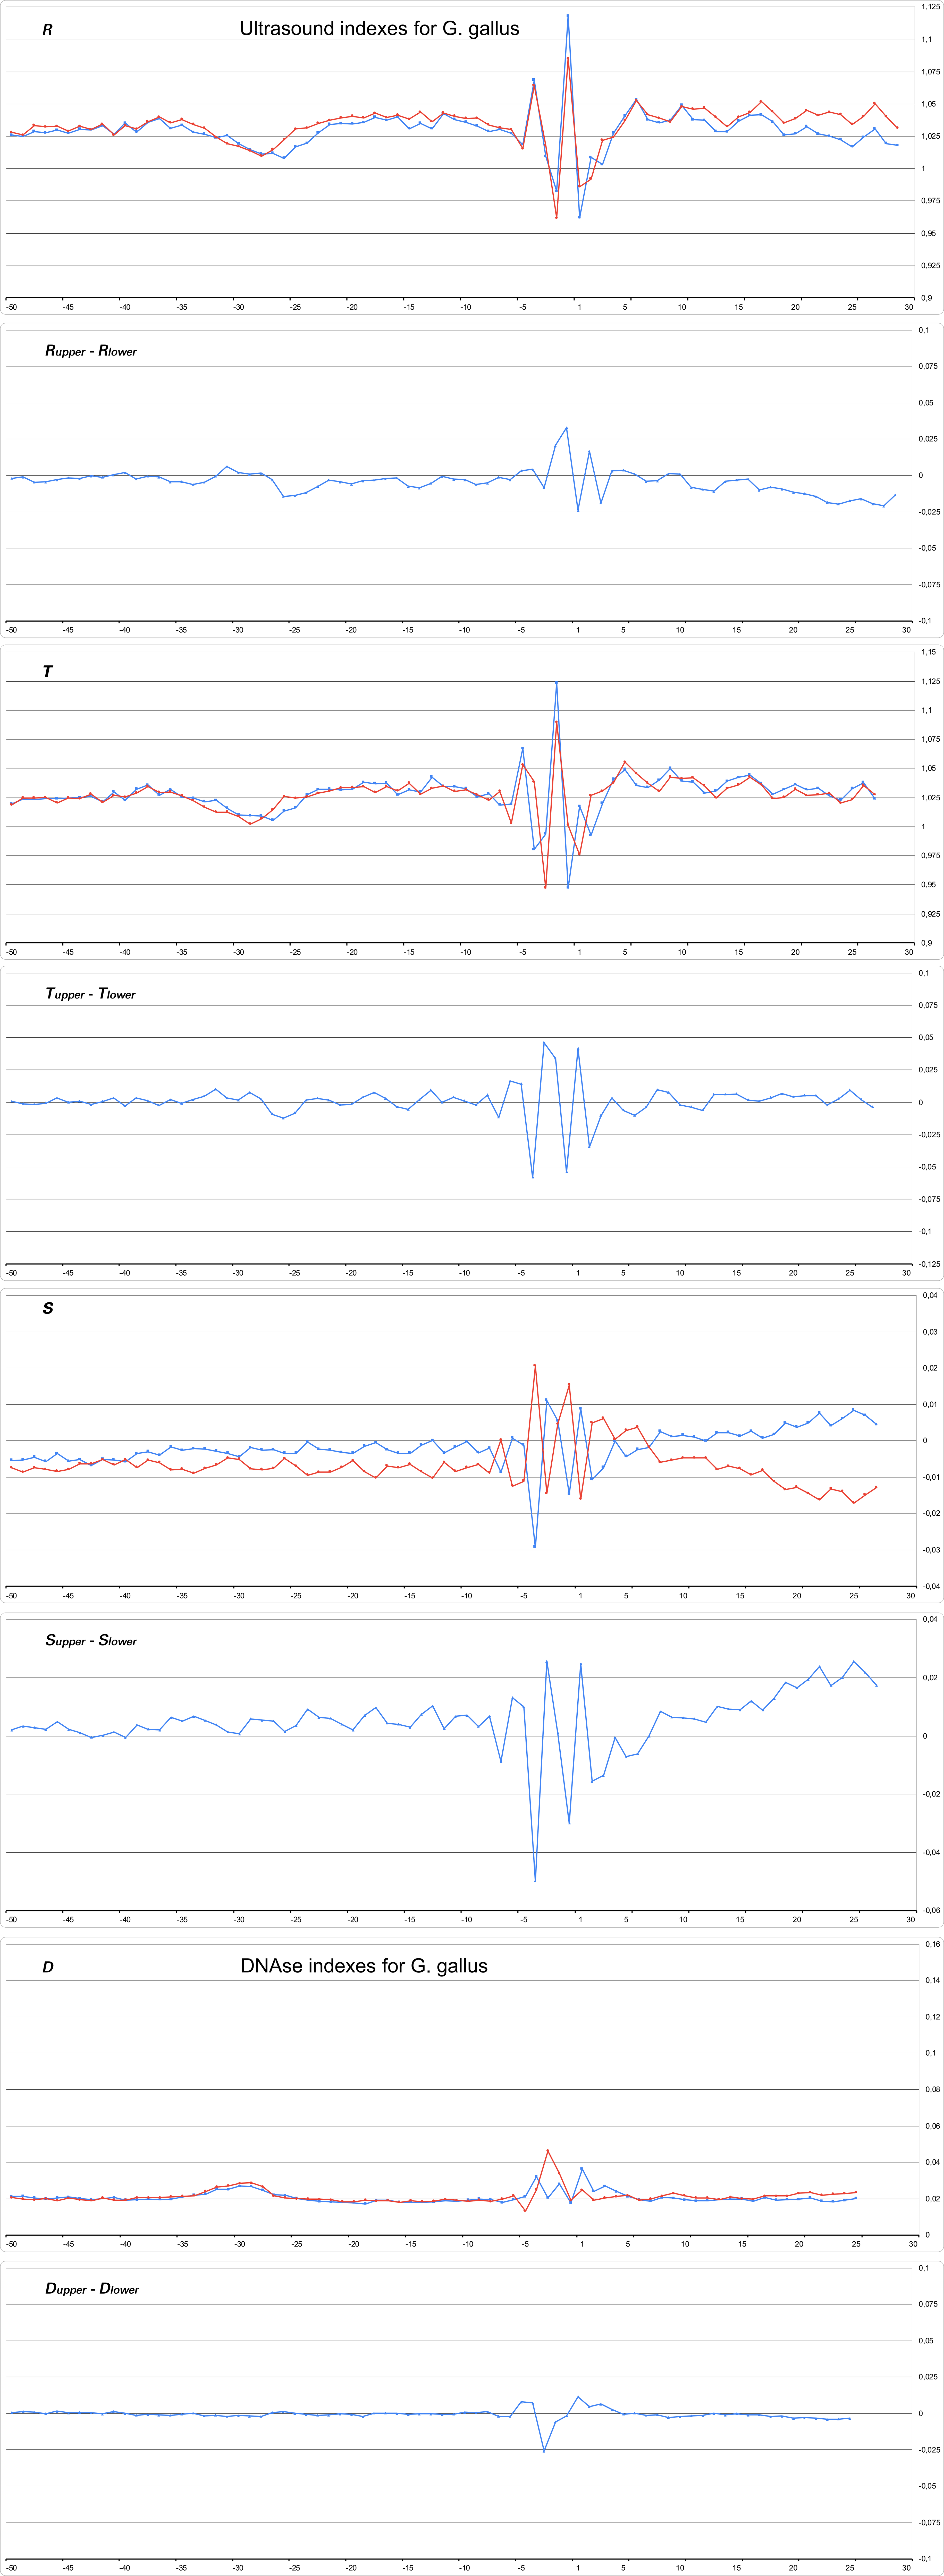

Supplement: s1 [file s1]

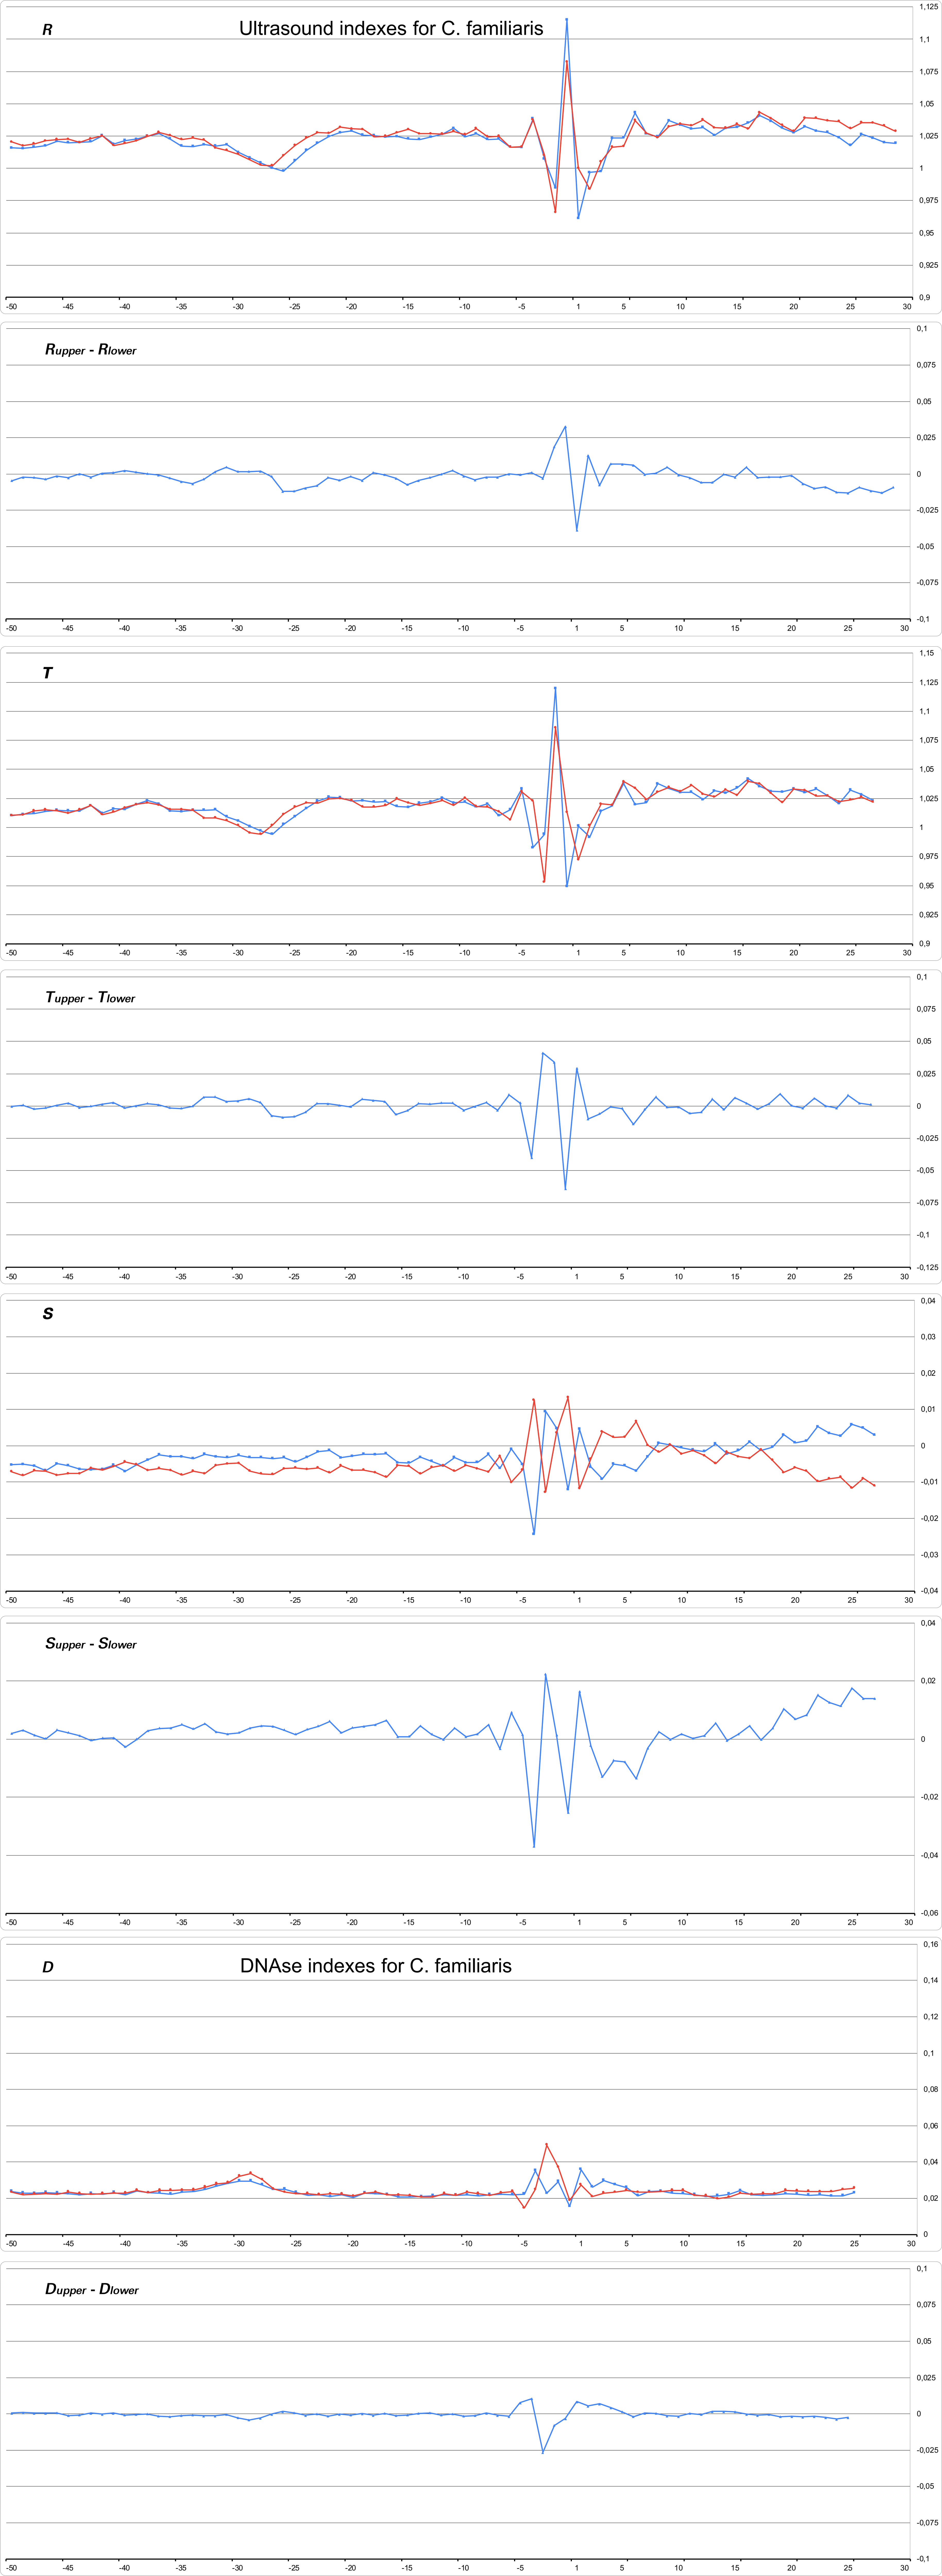

Supplement: s1 [file s1]

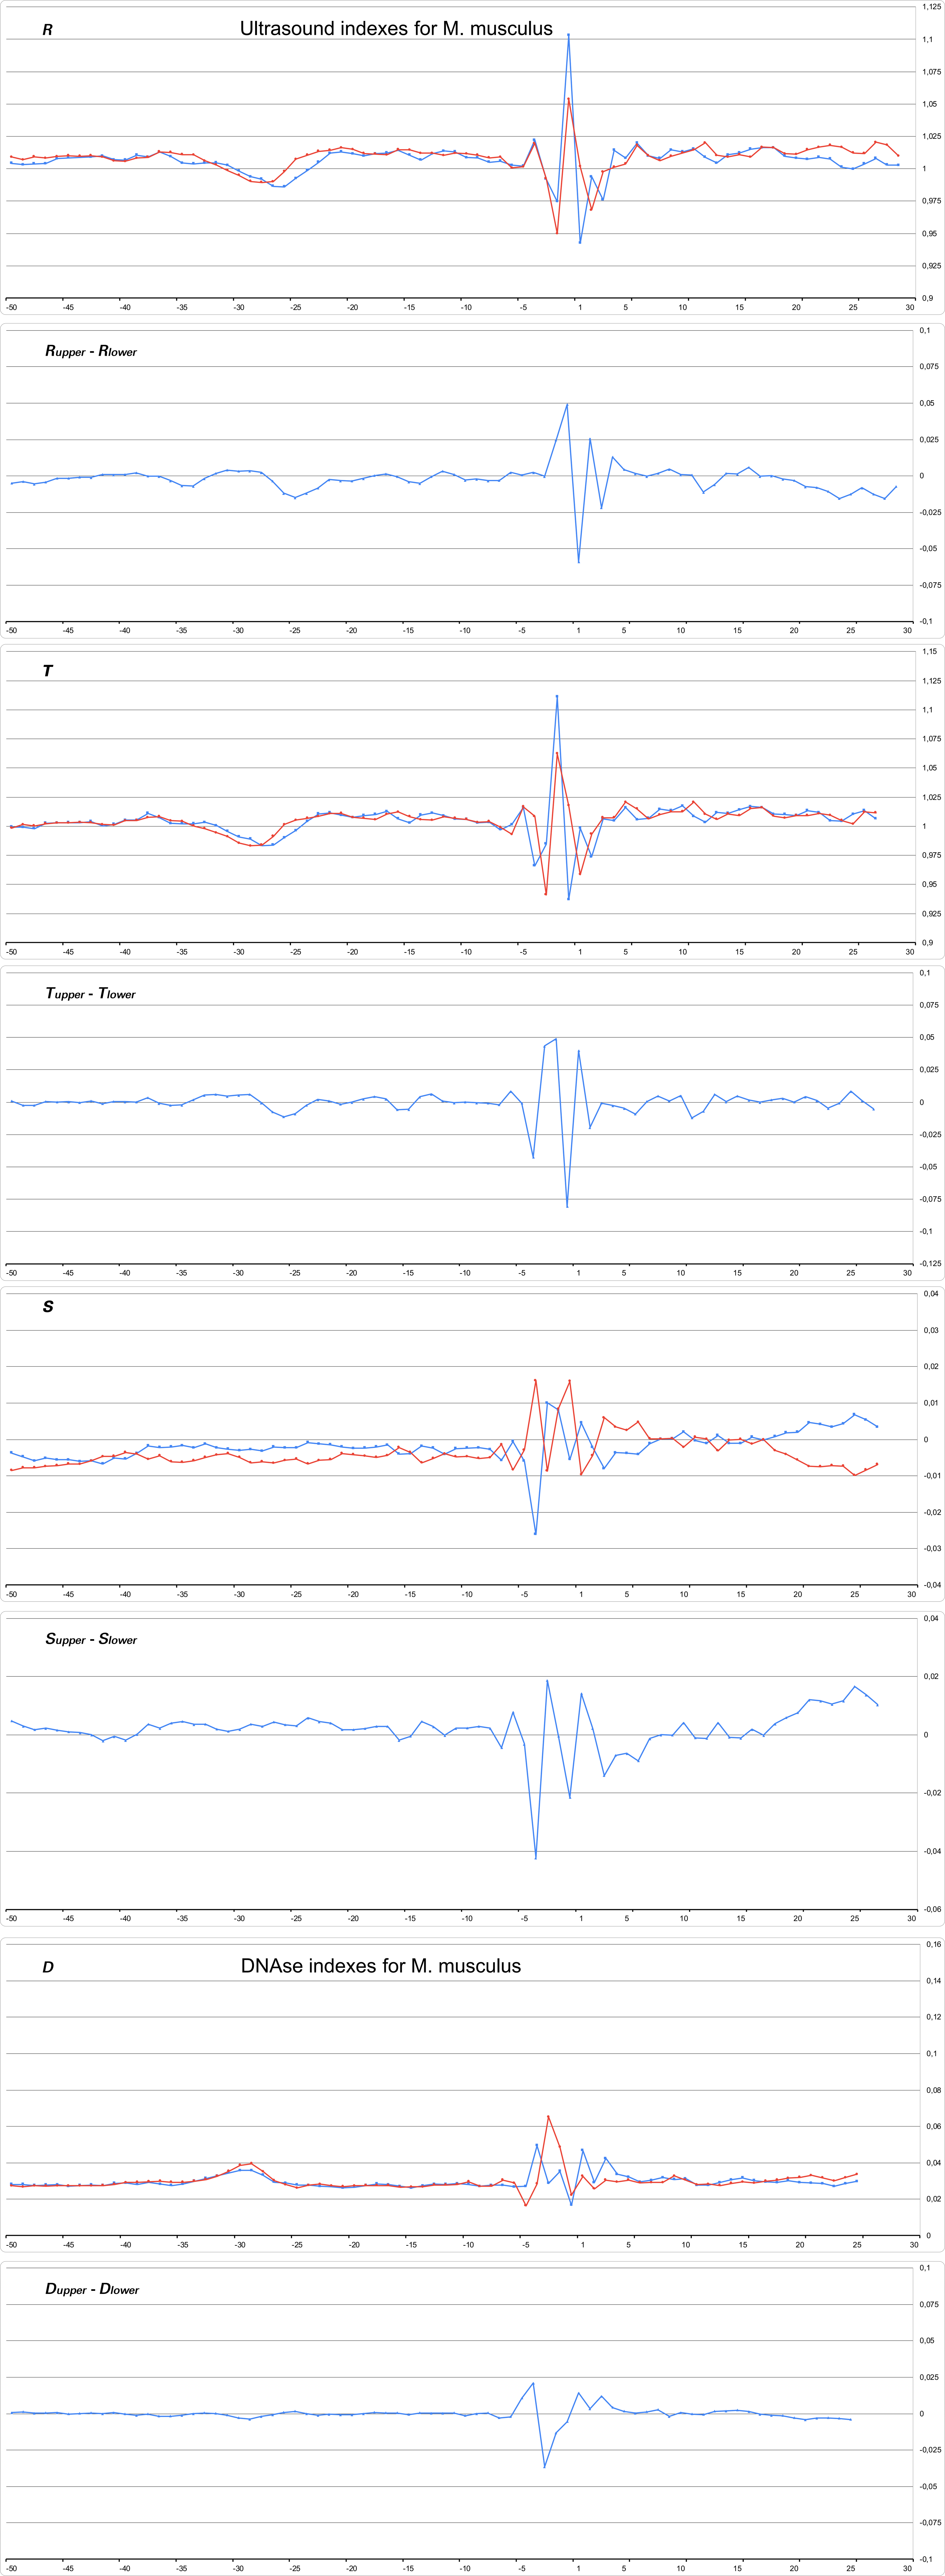

Supplement: s1 [file s1]

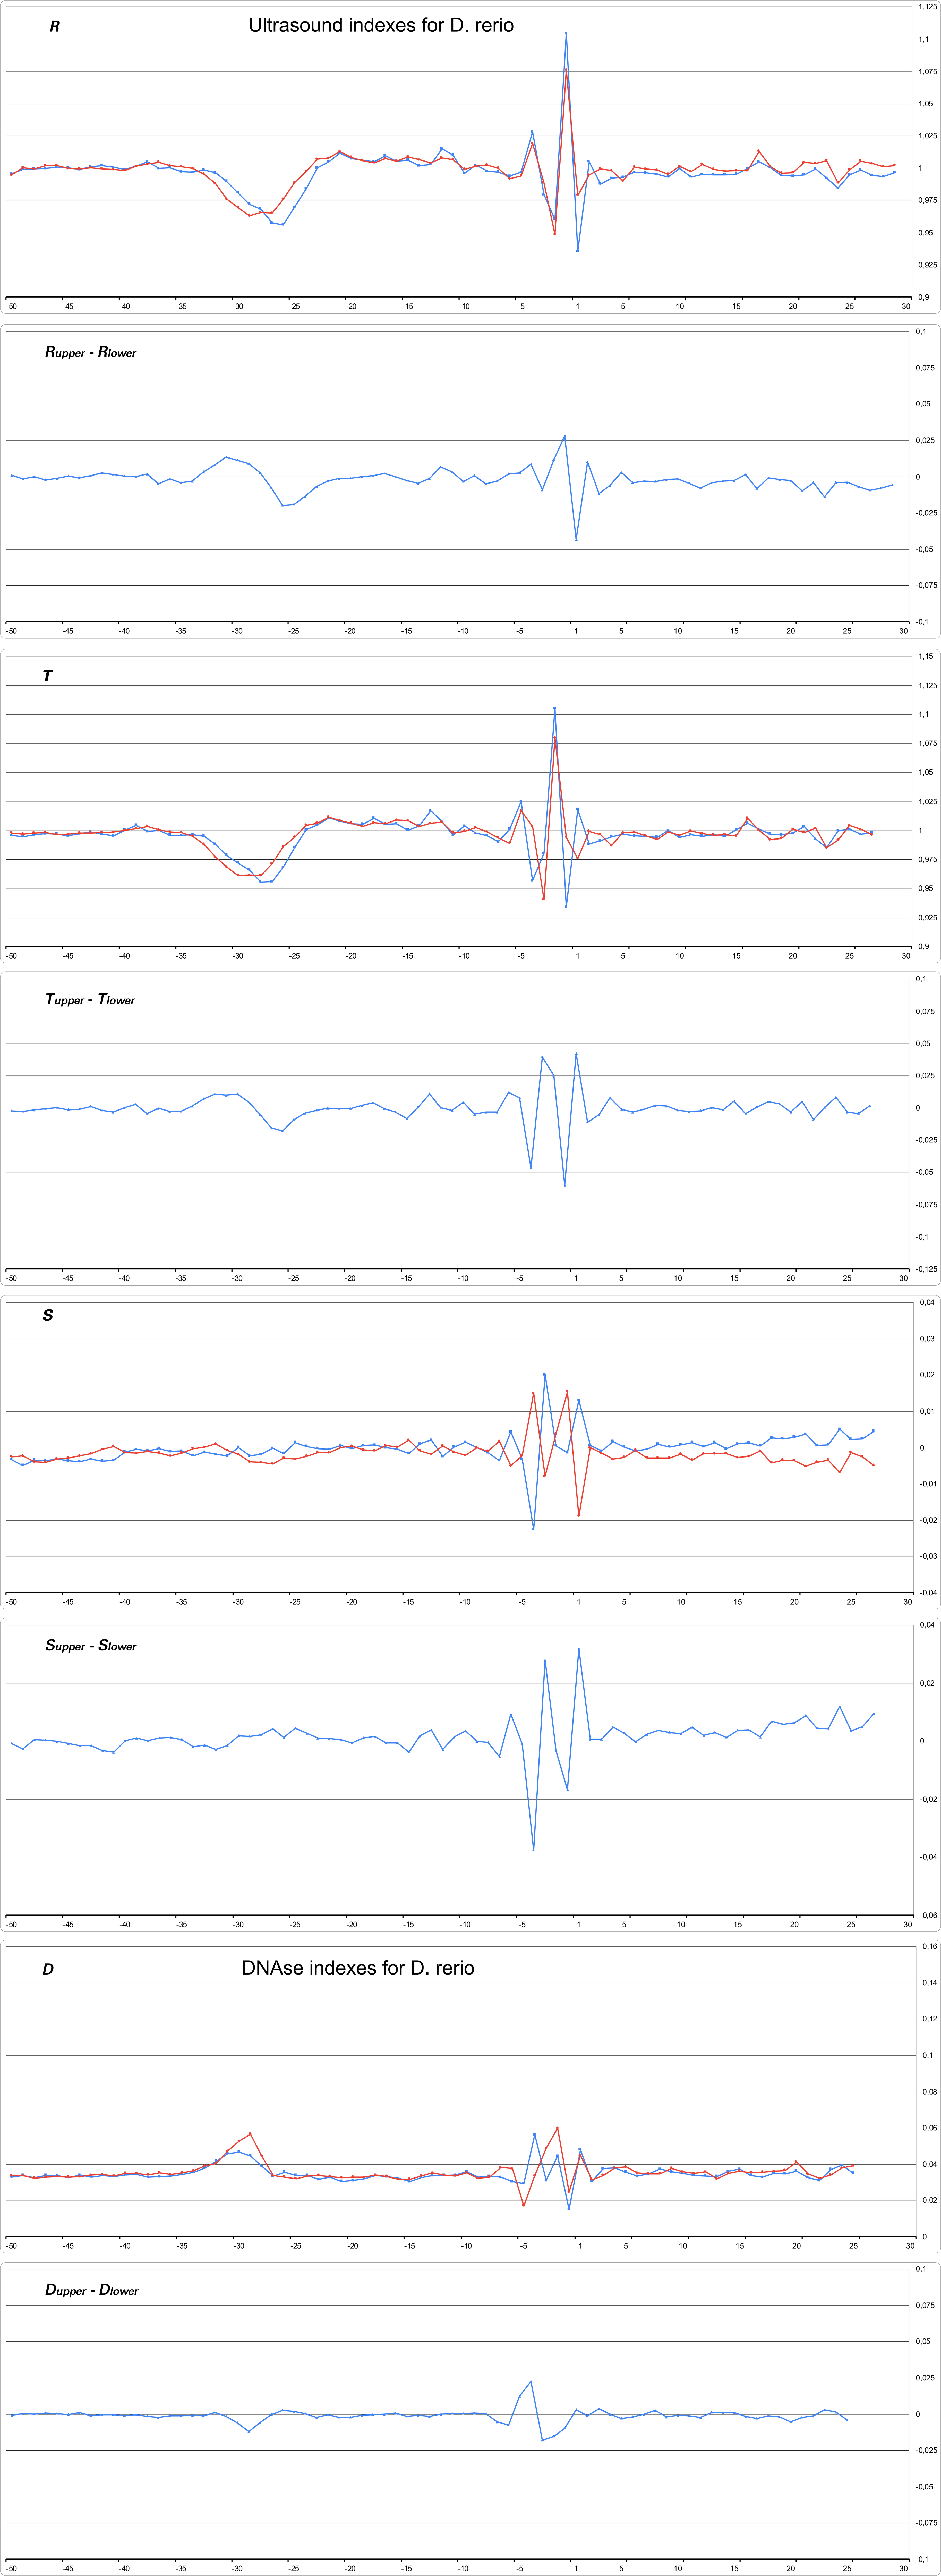

Supplement: s1 [file s1]

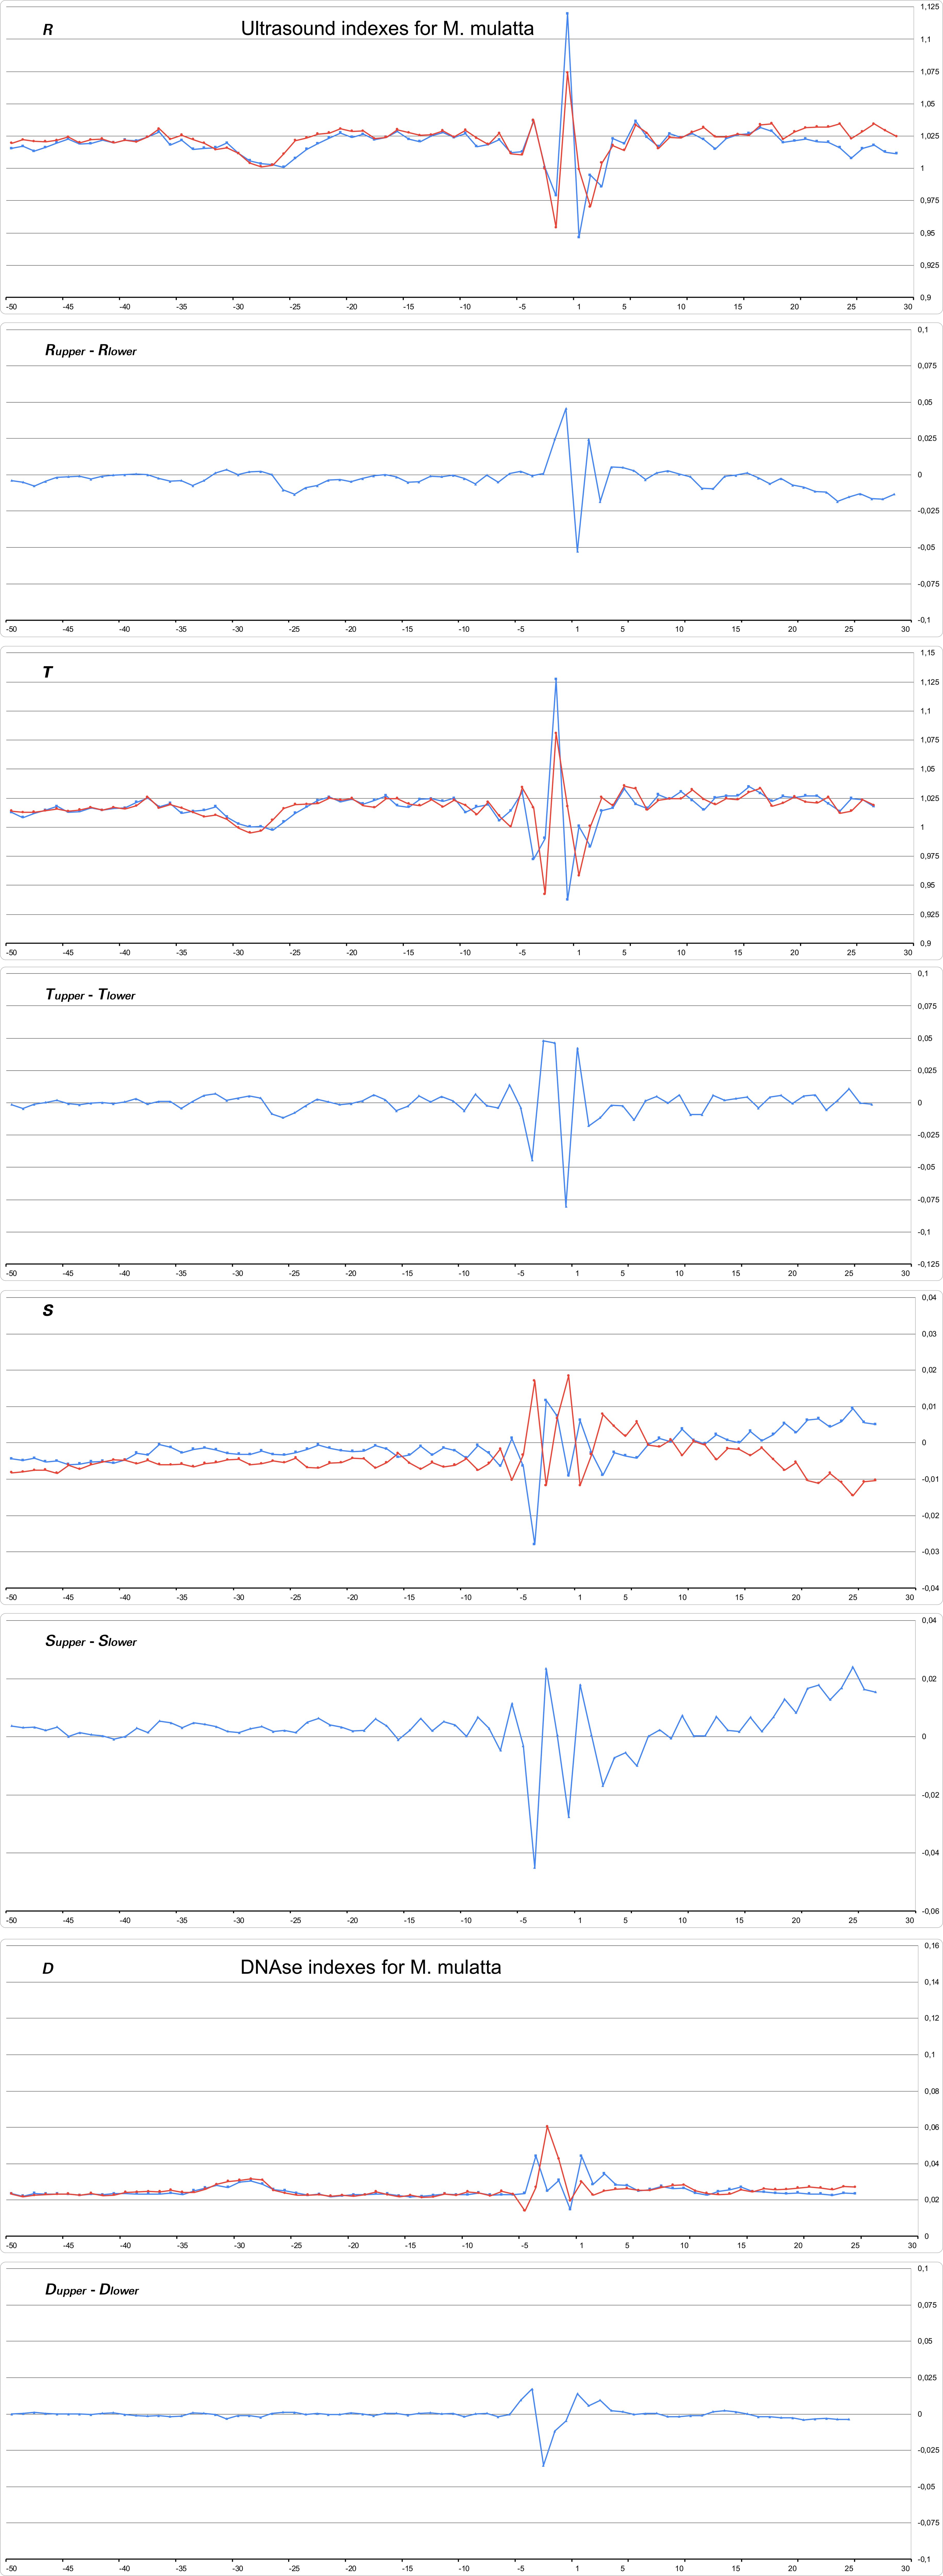

Supplement: s1 [file s1]

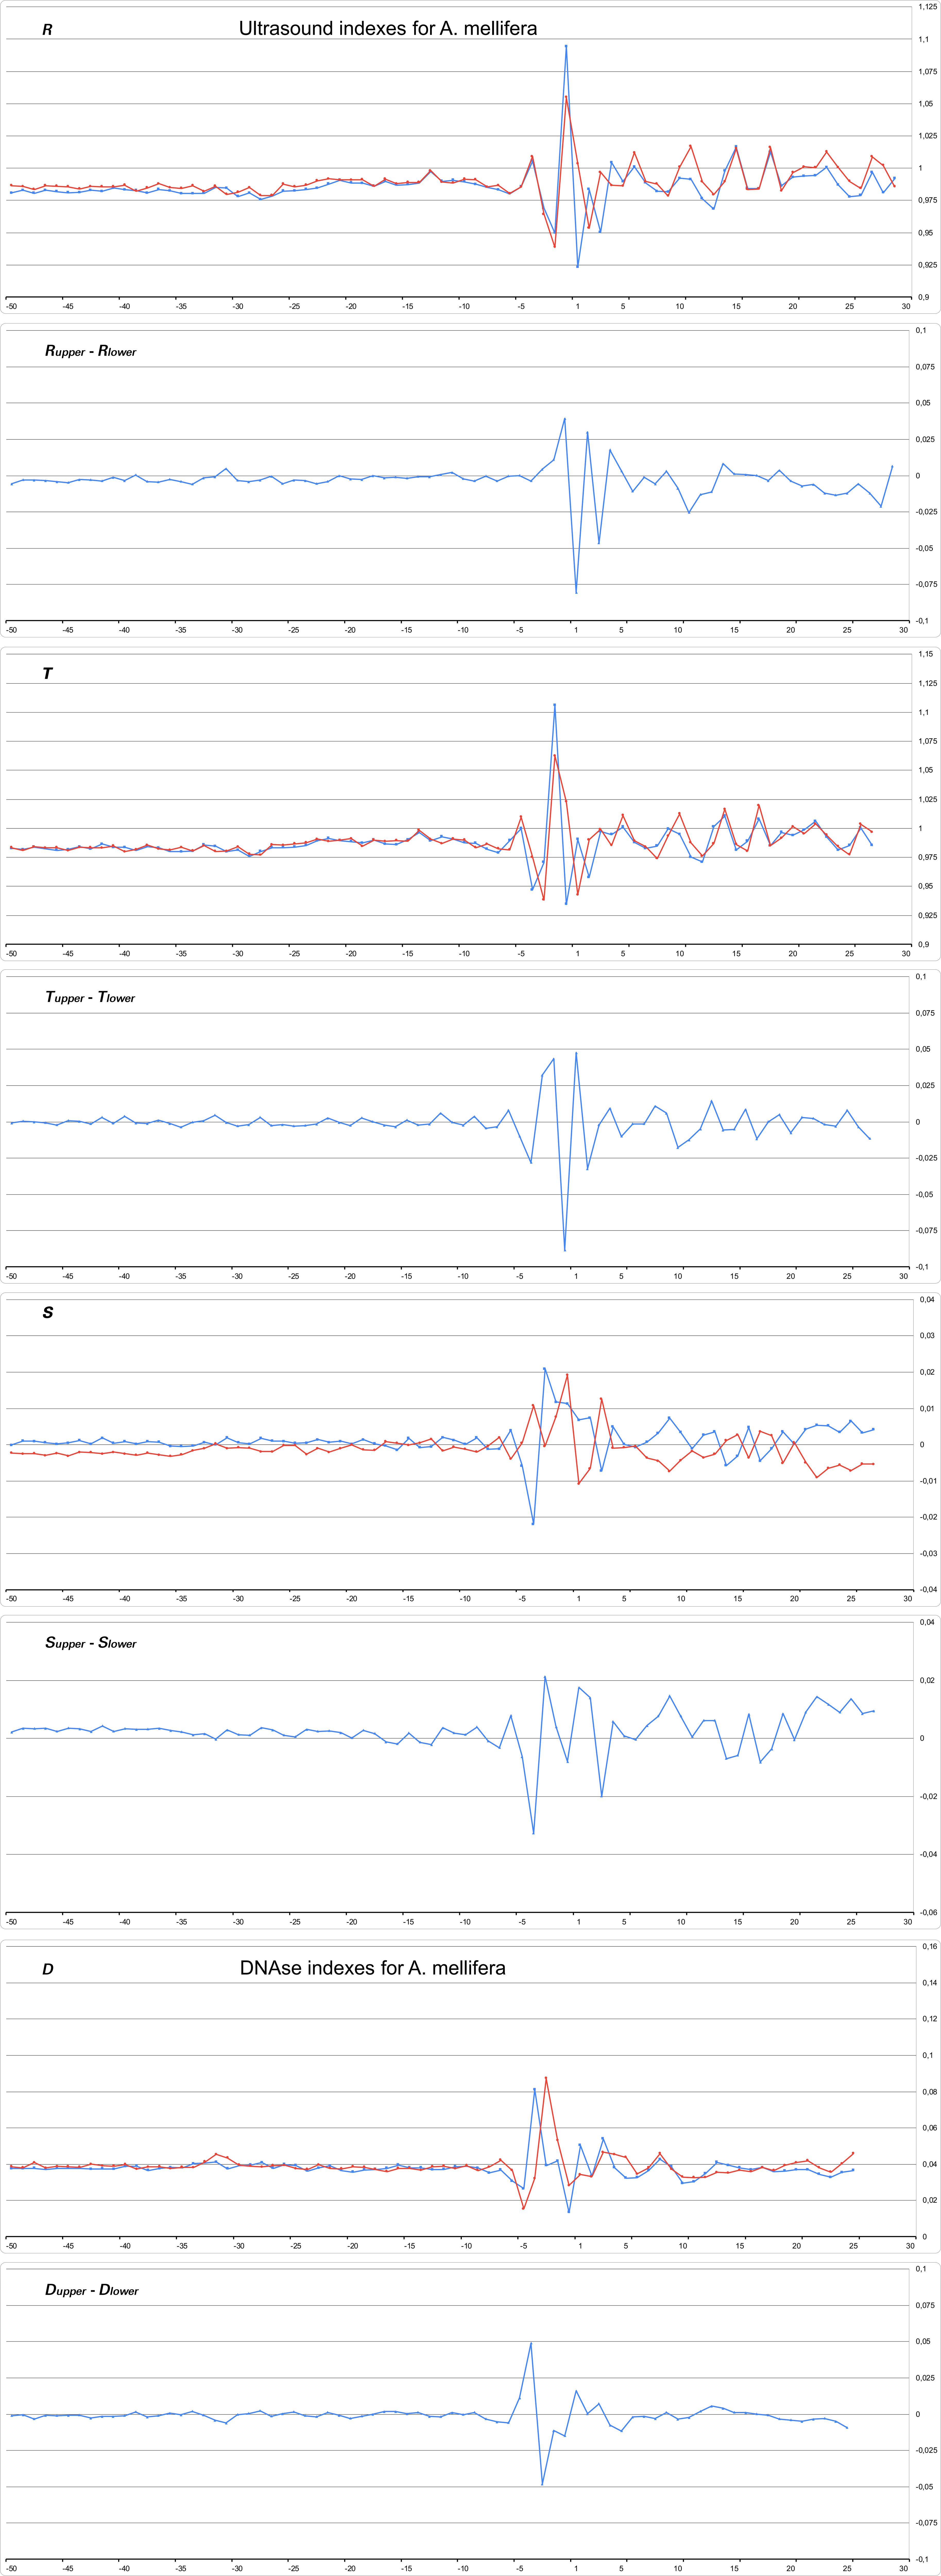

Supplement: s1 [file s1]

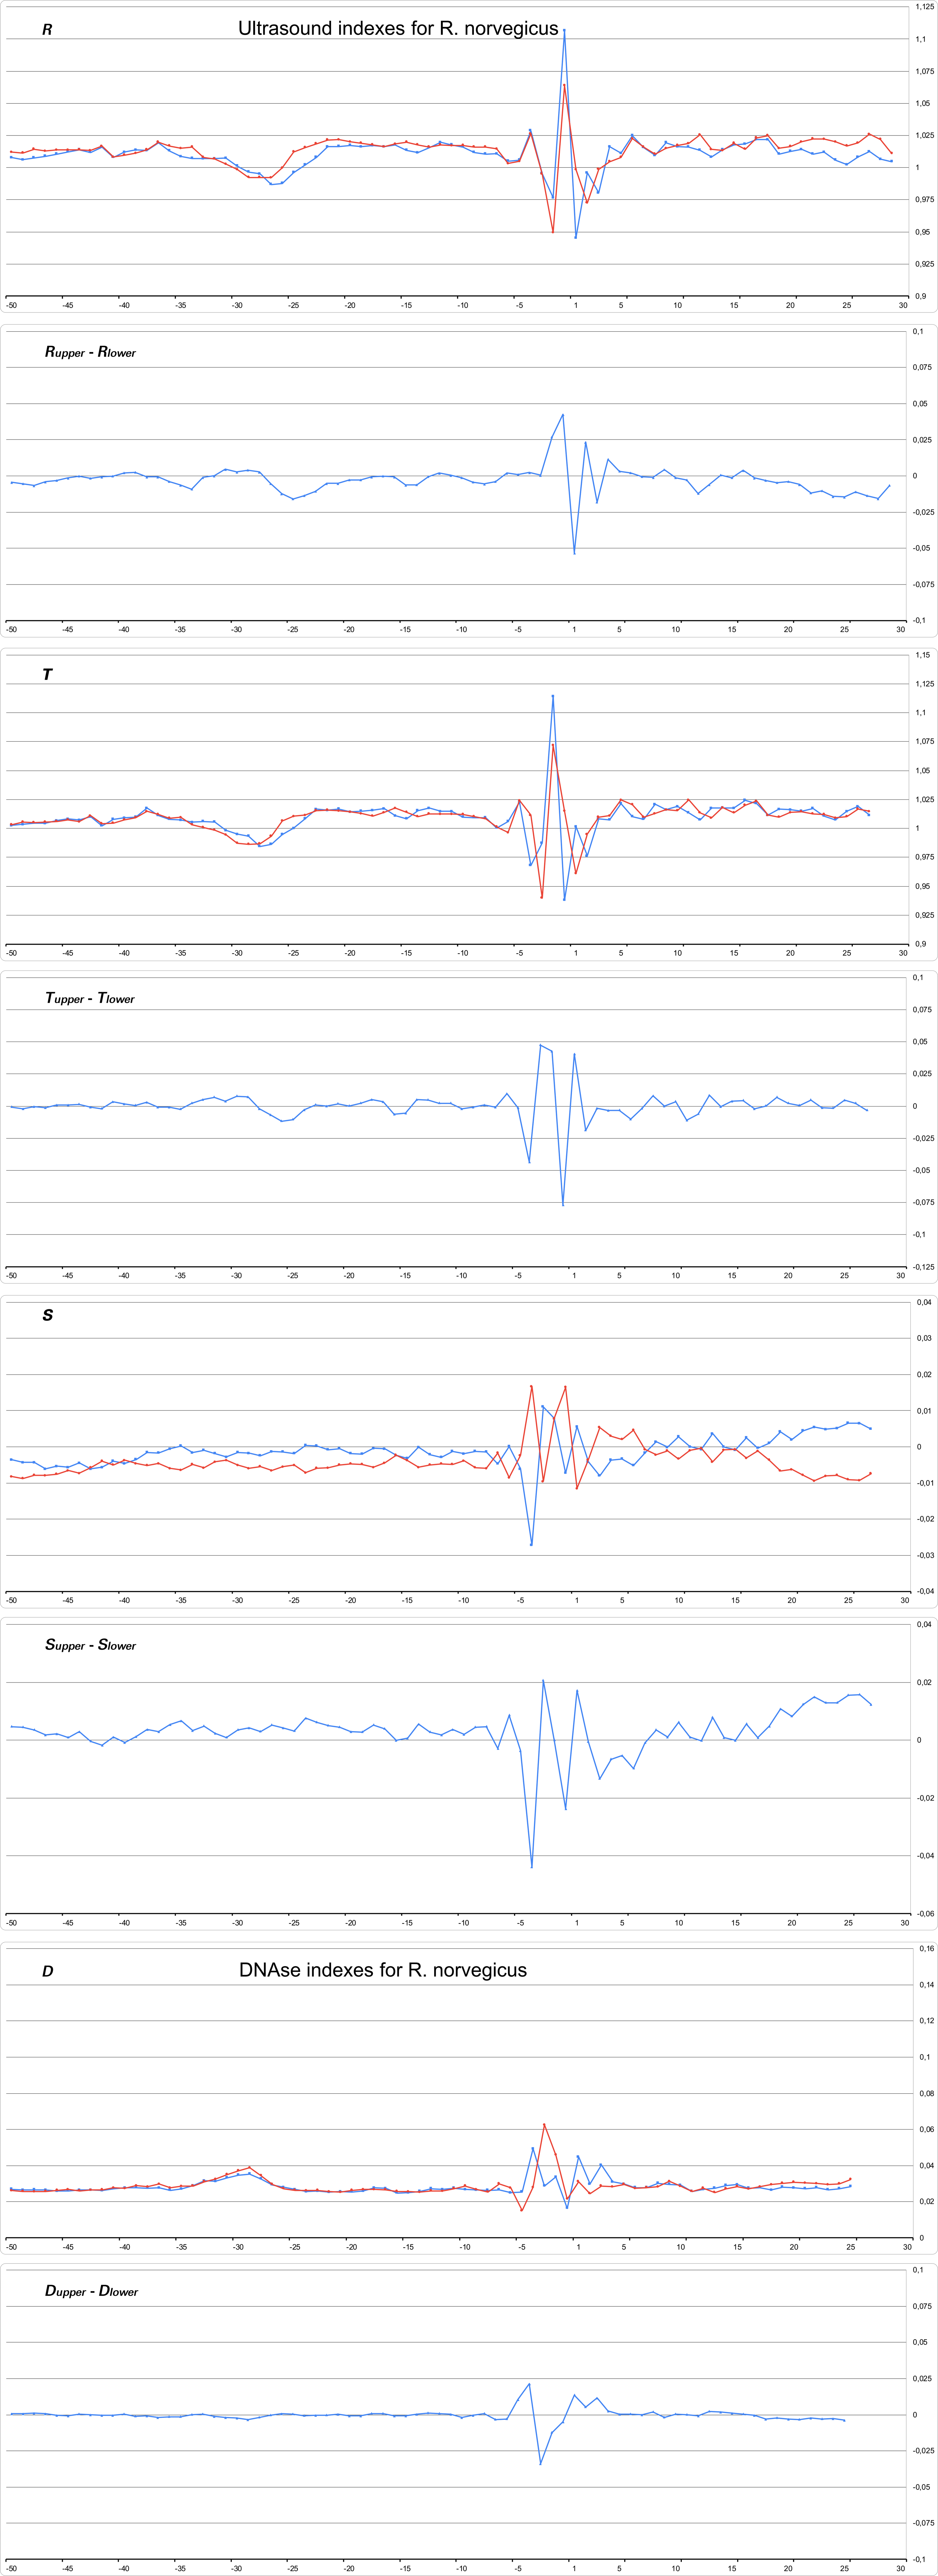

Supplement: s1 [file s1]
